1 FULL TITLE: *Phlebotomus papatasi* sand fly salivary protein diversity and  
2 immune response potential in Egypt and Jordan populations

3 SHORT TITLE: *Phlebotomus papatasi* salivary protein diversity in ecotopes of  
4 Egypt and Jordan

5 Catherine M. Flanley<sup>1</sup>, Marcelo Ramalho-Ortigao<sup>2</sup>, Iliano V. Coutinho-Abreu<sup>3</sup>, Rami Mukbel<sup>4</sup>,  
6 Hanafi A. Hanafi<sup>5</sup>, Shabaan S. El-Hossary<sup>5</sup>, Emadeldin Y. Fawaz<sup>5</sup>, David F. Hoel<sup>6</sup>, Alexander  
7 W. Bray<sup>1</sup>, Gwen Stayback<sup>1</sup>, Douglas A. Shoue<sup>1</sup>, Shaden Kamhawi<sup>3</sup>, Scott Emrich<sup>7</sup>, Mary Ann  
8 McDowell<sup>1\*</sup>

9 <sup>1</sup> Department of Biological Sciences, Eck Institute for Global Health, University of Notre Dame,  
10 Notre Dame, IN, United States of America

11 <sup>2</sup> Department of Preventive Medicine and Biostatistics, F. Edward Hebert School of Medicine,  
12 Uniformed Services University of the Health Sciences, Bethesda, Maryland, United States of  
13 America

14 <sup>3</sup> Laboratory of Malaria and Vector Research, NIAID-NIH, Rockville, Maryland, United States  
15 of America

16 <sup>4</sup> Faculty of Veterinary Medicine, Jordan University of Science and Technology, Irbid, Jordan

17 <sup>5</sup> Vector Biology Research Program, U.S. Naval Medical Research Unit No. 3, Cairo, Egypt

18 <sup>6</sup> Lee County Mosquito Control District, 15191 Homestead Road, Lehigh Acres, FL 33971

19 <sup>7</sup> Min H. Kao Department of Electrical Engineering and Computer Science, University of  
20 Tennessee, Knoxville, Tennessee, United States of America

21 \* Corresponding author

22 Email: [mcdowell.11@nd.edu](mailto:mcdowell.11@nd.edu)

23 **Abstract**

24 *Phlebotomus papatasi* sand flies inject their hosts with a myriad of pharmacologically active  
25 salivary proteins to assist with blood feeding and to modulate host defenses. These salivary  
26 proteins have been studied for their role in cutaneous leishmaniasis disease outcome with  
27 different salivary proteins attenuating or exacerbating lesion size. Studies have shown that while  
28 co-administered sand fly saliva exacerbates *Leishmania major* infections in naïve mice, animals  
29 pre-exposed to saliva are protected, with the infection attenuated via a delayed-type  
30 hypersensitivity immune reaction. These studies highlight the potential of the salivary  
31 components to be used as a vaccine. One protein in particular, *P. papatasi* salivary protein 15  
32 (PpSP15) has been intensively studied because of its ability to protect mice against *Le. major*  
33 challenge. The number of antigenic molecules included in vaccines is restricted thus  
34 emphasizing the role of population genetics to identify molecules, like PpSP15, that are  
35 functionally significant, conserved across populations and do not experience selection. Three  
36 distinct ecotope study sites, one in Egypt (Aswan) and two in Jordan (Swaimah and Malka),  
37 were chosen based on their elevation, rainfall, vegetation, differing reservoir species, and the  
38 presence or absence of *Le. major*. The objective of this work was to analyze the genetic  
39 variability of nine of the most abundantly expressed salivary proteins including PpSP12,  
40 PpSP14, PpSP28, PpSP29, PpSP30, PpSP32, PpSP36, PpSP42, and PpSP44 and to predict their  
41 ability to elicit an immune response. Two proteins, PpSP12 and PpSP14, demonstrated low  
42 genetic variability across the three sand fly populations represented in this study, with multiple  
43 predicted MHCII epitope binding sites, identified by alleles present in the human populations  
44 from the study sites. The other seven salivary proteins revealed greater allelic variation across  
45 the same sand fly populations indicating that their use as vaccine targets may prove to be  
46 challenging.

## 47 **Author Summary**

48 *Phlebotomus papatasi* sand flies vector *Leishmania major* parasites, one of the causative agents  
49 of cutaneous leishmaniasis (CL). Approximately 0.7-1.2 million cases of CL occur each year. CL  
50 produces disfiguring skin lesions for which no vaccine currently exists. Hematophagous vector  
51 salivary proteins are pharmacologically active molecules that modulate inflammation,  
52 vasoconstriction, and blood clotting for females that require a sanguineous meal for oviposition.  
53 Salivary proteins from multiple phlebotomine sand fly species have been widely studied and  
54 scrutinized to characterize their function in blood feeding facilitation as well as their ability to  
55 exacerbate or attenuate *Leishmania* infections and their potential as vaccine candidates. A  
56 successful sand fly salivary protein-based vaccine to combat CL largely depends on the genetic  
57 variability, expression profiles, and human immune response to the salivary proteins selected  
58 from geographically distant sand fly populations. The purpose of this study was to analyze these  
59 parameters in nine abundantly expressed *P. papatasi* salivary proteins from three distinct  
60 ecotopes in Egypt and Jordan in order to assess their potential as vaccine targets

## 61 **Introduction**

62 Leishmaniasis is a group of neglected diseases caused by *Leishmania* parasites, vectored  
63 by phlebotomine sand flies and endemic in 98 countries [1]. Different *Leishmania* species can be  
64 or are uniquely associated with distinct clinical outcomes, ranging from cutaneous lesions to fatal  
65 visceral disease. Sand flies on the other hand may be specific or not for the transmission of  
66 *Leishmania* spp. *Phlebotomus papatasi* sand flies are specific vectors of *Leishmania major*, one  
67 of the causative agents of cutaneous leishmaniasis (CL) [2]. Approximately 0.7-1.2 million cases  
68 of CL occur each year [1]. CL produces scarring skin lesions and current treatments can be toxic,  
69 expensive, require multiple administrations, and can be difficult to access [2]. Although

70 significant effort has been expended, there currently is no efficacious vaccine for human  
71 populations.

72 Salivary proteins of hematophagous insects are pharmacologically active molecules that  
73 modulate inflammation, vasoconstriction, and blood clotting [3]. In *P. papatasi* infected with *Le.*  
74 *major*, parasites are regurgitated into the host's skin during probing or feeding, along with a  
75 cocktail of salivary proteins, where an infection can be established. Salivary proteins from  
76 various phlebotomine sand fly species have been characterized with regards to their function in  
77 blood feeding and their effectiveness as markers of exposure [4–6]. Sand fly salivary proteins  
78 can exacerbate or attenuate *Leishmania* infections [7–9], and have been suggested as potential as  
79 vaccine candidates [10,11].

80 It has been previously determined that exposure to uninfected *P. papatasi* bites confers  
81 some level of protection against *Le. major* in murine models, presumably via stimulation of a  
82 delayed-type hypersensitivity immune response at the site of inoculation [12]. Over thirty  
83 different salivary proteins are inoculated into a host with each *P. papatasi* bite [13]. One  
84 particular salivary protein, PpSP15, induces a Th-1 mediated immune response with a hallmark  
85 increase in IFN- $\gamma$  in mice [8], and vaccination of nonhuman primates with the *P. duboscqi*  
86 orthologous PdSP15 resulted in a significant decrease in parasite load and lesion size, though full  
87 protection was not established [10]. Conversely, in naïve hosts, sand fly saliva exacerbates  
88 disease progression by downregulating the host's immune response while polarizing the immune  
89 response to favor Th2 cytokine production [8,14–16].

90 Several questions remain concerning the role of sand fly salivary proteins in the  
91 epidemiology of leishmaniasis, particularly those pertaining to cross species protection and  
92 genetic variability. Cross-protective effects of saliva from different phlebotomine species is

93 another current area of vaccine development research. A cross-protective effect against *Le. major*  
94 was demonstrated in mice pre-exposed to uninfected *P. papatasi* sand fly bites and subsequently  
95 challenged with *Le. major* plus either *P. papatasi* or *P. duboscqi* salivary gland homogenate [17].  
96 Both pre-exposed groups revealed smaller lesion sizes and a decreased parasitic load compared  
97 to the unexposed controls [17]. A similar study was conducted with New World sand fly species  
98 where hamsters inoculated with *Lu. longipalpis* salivary gland homogenate or a DNA plasmid  
99 coding for the highly expressed *Lu. longipalpis* salivary protein LJM19, were protected against  
100 challenge with either *Le. braziliensis* and *Lu. longipalpis* salivary gland homogenate, as well as  
101 *Le. braziliensis* and *Lu. intermedia* salivary gland homogenate [18].

102 Immunodominant sand fly salivary proteins have also been exploited in epidemiological  
103 studies as markers of exposure and risk for *Leishmania* transmission. Anti-saliva antibodies  
104 correlate to intensity of exposure with higher anti-saliva antibody titers indicating greater  
105 exposure to sand fly bites and a greater probability of transmission [16,19,20]. A disadvantage of  
106 measuring antibodies against whole sand fly saliva is the possibility of cross-reactivity between  
107 different sand fly species as they may share a significant number of salivary protein antigens.  
108 Ideally, a single species-specific salivary protein could be identified to determine exposure and  
109 transmission risk (reviewed in [21]). PpSP32, an immunodominant 32 kDa protein present in *P.*  
110 *papatasi* saliva, has been validated as an exposure screening tool in Tunisia and Saudi Arabia  
111 with no cross-reactivity detected when tested against *P. perniciosus*, a vector of *Le. infantum*,  
112 which is also commonly found in sympatry with *P. papatasi* [4,6,22].

113 Genetic variability among populations of sand flies will influence the success of any  
114 salivary protein-based vaccine. Specifically, highly polymorphic salivary proteins and those  
115 under positive selection should be cautiously considered for further vaccine development.

116 PpSP15, sampled from sand fly populations in Egypt, Jordan, Saudi Arabia, Israel, and Sudan  
117 demonstrated minimal selection with a high degree of conservation at the amino acid level  
118 validating PpSP15 as a potential vaccine candidate [23,24]. Here we analyzed the genetic  
119 variability of nine highly expressed *P. papatasi* salivary proteins including PpSP12, PpSP14,  
120 PpSP28, PpSP29, PpSP30, PpSP32, PpSP36, PpSP42, and PpSP44 from three representative *P.*  
121 *papatasi* populations from Egypt and Jordan.

122 As a geographically widespread species, *P. papatasi* is prevalent in the Mediterranean  
123 Basin, especially the Middle East and North Africa, with an ability to adapt to a variety of  
124 habitats that exhibit different climates, elevations, vegetation, and host species. As a result of  
125 adaptation to ecological variation, it is expected that sand flies and their salivary proteins face  
126 selective pressures that could influence vector competency and disease outcomes [25]. *P.*  
127 *papatasi* population genetics studies have demonstrated that although pockets of genetic  
128 variability exist between populations, evidence suggests that the species as a whole remains  
129 relatively homogeneous [26–31].

130 Even so, it remains vitally important to continually monitor salivary protein genetic  
131 variability to ensure the most appropriate salivary proteins are chosen as vaccine targets. A  
132 successful sand fly salivary protein-based vaccine to combat CL also depends on expression  
133 profiles and human (host) immune response to these salivary proteins, ideally selected from  
134 geographically distant sand fly populations. Egypt and Jordan are classified as endemic areas for  
135 CL, with certain regions designated as hyperendemic in Jordan, with *Le. major* causing the  
136 majority of CL cases but *Le. tropica* incriminated in Jordan as well [32,33]. The purpose of this  
137 study was to analyze 9 abundantly expressed *P. papatasi* salivary proteins as potential vaccine  
138 targets that are conserved across populations from distinct ecotopes in Egypt and Jordan and

139 demonstrate the potential to elicit an immune response, similar to PpSP15 [24]. We recommend  
140 that PpSP12 and PpSP14 also be considered for further vaccine development as we show that  
141 they are conserved across populations while also have potential to elicit an immune response.  
142 We caution of the use of a highly variable protein like PpSP28 for further development.

## 143 **Methods**

### 144 **Sand flies**

145 *P. papatasi* were collected from one field site in each of the following locations: Aswan,  
146 Egypt (GPS coordinates N 24°10', E 32°52'), Malka, Jordan (GPS coordinates 31°48', E  
147 35°35'), and Swaimeh, Jordan (N 32°40', E 35°45'), in 2006 and 2007 (Fig 1). Both CO<sub>2</sub> baited  
148 (Aswan) and non-baited (Malka and Swaimeh) CDC-style light traps collected sand flies  
149 between the hours of 18:00 and 06:00. Three trappings were attempted each year in 2006 and  
150 2007: early (June), middle (August), and late (September). One collection occurred in Malka in  
151 late (September) 2006 while three collections occurred in Swaimeh and Aswan in late  
152 (September) 2006, early (June), and middle (August) 2007. Sand flies remained alive until  
153 dissection and were euthanized in soapy water. Flies were individually identified by microscopic  
154 examination of female spermathecae according to Lane [34], and only non-parous females were  
155 used in the analysis presented. Parity was assessed according to Anez [35].

156

### 157 **Fig 1. *Phlebotomus papatasi* study collection sites.**

158 Map adopted from Wikimedia Commons by Styx under public domain [36].

159

160 *P. papatasi* from Aswan (PPAW) were collected from a small village near the Nile River  
161 that permits artificial irrigation for the cultivation of crops like corn (*Zea mays*), wheat (*Triticum*

162 *aestivum*), mangoes (*Mangifera indica*), and date palms (*Phoenix dactylifera*). Dogs, goats, and  
163 cattle are kept and raised in the village as well. The village sits at 117 m above sea level.  
164 Temperatures typically fall between 24° C and 45° C with minimal rainfall. Sand flies are  
165 abundant in this village though *Le. major* is absent [37]. *P. papatasi* collected from Swaimeh  
166 (PPJS) inhabit an area endemic for zoonotic *Le. major* due to the presence of *Psammomys*  
167 *obesus*, the reservoir host [38]. This low elevation area (~350m below sea level) experiences a  
168 Saharan Mediterranean climate with rainfall less than 50mm that occurs from November to  
169 April. Temperatures maximally range from 35-40° C in summer months and minimally range  
170 from 8-12° C in the winter. The sandy, rocky, salty soil supports halophytic and tropical flora  
171 species such as chenopods [39]. *P. papatasi* collected from Malka (PPJM) inhabit a rocky  
172 landscape with a typical Mediterranean climate. Malka is located at an elevation of 670 m.  
173 During the collection time in 2006, only *Le. tropica* was present in the region and *Le. major* was  
174 absent hypothesized due to the absence of *Ps. obesus* [40].

## 175 **Sample preparation**

176 Dissected, *P. papatasi* female heads with both salivary glands intact were placed in 1.5  
177 ml centrifuge tubes with 50 µL RNA later (Ambion, Austin, TX, USA) and homogenized with  
178 an RNase-free pestle and hand-held homogenizer. Samples were stored at 4° C for up to 48  
179 hours, shipped on dry ice, and then stored at -80° C until analyzed. Table 1 outlines the number  
180 of individuals from each site for each salivary protein.

181 **Table 1. *Phlebotomus papatasi* salivary protein amplicon lengths and number of individual**  
182 **sand flies per collection site.**

183

| Salivary Protein | Amplicon length (bp) | All | PPAW | PPJM | PPJS |
|------------------|----------------------|-----|------|------|------|
| PpSP12           | 291                  | 96  | 26   | 29   | 41   |



|        |     |     |    |    |    |
|--------|-----|-----|----|----|----|
| PpSP14 | 246 | 119 | 29 | 44 | 46 |
| PpSP28 | 554 | 111 | 26 | 30 | 55 |
| PpSP29 | 651 | 126 | 46 | 38 | 42 |
| PpSP30 | 183 | 70  | 20 | 28 | 22 |
| PpSP32 | 568 | 130 | 42 | 45 | 43 |
| PpSP36 | 637 | 82  | 25 | 22 | 35 |
| PpSP42 | 614 | 109 | 27 | 45 | 37 |
| PpSP44 | 675 | 121 | 35 | 44 | 42 |

184  
185 Amplicon lengths = base pairs. PPAW: Aswan, Egypt; PPJM: Malka, Jordan; PPJS: Swaimeh,  
186 Jordan.

### 187 **RNA extraction and cDNA synthesis**

188 Total RNA was extracted from the heads and salivary glands of individual *P. papatasi*  
189 samples using the RNeasy Mini RNA isolation kit (Qiagen, Valencia, CA, USA). cDNAs were  
190 synthesized using Invitrogen reagents (Invitrogen, Carlsbad, CA, USA), per manufacturer's  
191 specifications and briefly outlined in Coutinho-Abreu et al 2011 [41] and Ramalho-Ortigão et al  
192 2015 [24].

### 193 **Sequence analyses**

194 cDNAs produced from the total RNA of individual *P. papatasi* were amplified by PCR.  
195 Primers used to amplify each salivary protein can be found in S1 Table. PCR products were  
196 purified by twice washing in 150  $\mu$ L DNase/RNase-free water (Invitrogen, Carlsbad, CA, USA)  
197 in Multiscreen PCR cleaning plates (Millipore, Burlington, Massachusetts, USA) with vacuum  
198 application (10 psi). Purified PCR products were resuspended in 50  $\mu$ L sterile water. Leading  
199 and lagging strands were sequenced and poor-quality sequences were excluded from the  
200 analyses. Forward and reverse chromatograms were inspected and consensus sequences were  
201 aligned using MEGA [42] and manually corrected. The resulting sequences were deposited in  
202 GenBank (<http://ncbi.nlm.nih.gov>) and accession numbers can be found in S1 Table.

### 203 **Multi-copy assessment of salivary proteins**

204 We looked for copy number variation relative to currently assembled *P. papatasi* loci by  
205 following the approach of Miles *et al.* [43]. In short, paired sequences from the two individual  
206 entries with the most reads (SRR1997534 and SRR199776) were downloaded from SRA. After  
207 initial overall quality checking using FastQC [44], these paired reads were then aligned to the  
208 Ppap reference assembly using BWA 0.5.9r16 [45]. Next, based on the resulting alignments  
209 (SAM output), reads were placed into non-overlapping 300 bp bins such that each bin contained  
210 all reads whose alignment started in its corresponding 300 bp interval. Unlike Miles *et al.* [43]  
211 there were no known “core genome” coordinates that excluded repeat regions for computing a  
212 less biased average count for normalization. Therefore, discrete counts in each bin were  
213 normalized based on the average count across all scaffolds, median count, and average count  
214 excluding terminal 2 kb of scaffolds (1 kb on 5’ and 3’ of scaffolds). Although normalization  
215 slightly differed, the results in terms of under (less than 0.5 average/median) and over (more than  
216 2 average/median) remained the same within and between the two samples considered. Because  
217 of under assembly of heterologous regions, the final normalization value was computed based on  
218 the empirical distribution of read bin counts with the value with the greatest number of entries  
219 near the computed overall average. Significance was derived using a Poisson model  
220 parameterized with this estimate as lambda using the Lander-Waterman model of sequence  
221 sampling [46], and a Bonferroni correction was applied to correct for multiple comparisons.

## 222 **Population analyses**

223 Both interpopulation and intrapopulation analyses were performed using DnaSP v.6 [47].  
224 Interpopulation parameters assessed included: fixation indexes such as  $F_{st}$  [48,49] and  $G_{st}$  [50],  
225 as well as  $H_s$  and  $K_s$  indexes [51]. Other parameters assessed included: neutral evolution  
226 hypothesis [52] and neutrality tests Tajima’s  $D$  [53] and Fu and Li’s  $D$  and  $F$  [54]. The  $K_a/K_s$

227 ratio ( $\omega$ ) for the whole salivary protein as well as a sliding window analysis of 70 codons each  
228 was calculated.

229 Weblogos [55] pictorially depict the relative frequencies of polymorphic nucleotides and  
230 amino acids. The height of the bases indicate relative frequency and conservation is depicted by  
231 the overall weight of the stack. Network 5 [56] generated median joining networks exhibiting  
232 haplotype relationships.

### 233 **Secondary structure and T-cell epitope predictions**

234 Secondary structure predictions for each salivary protein were generated using a  
235 secondary structure prediction tool (<http://bioinf.cs.ucl.ac.uk/psipred>) with default parameters  
236 based on the consensus sequence for all individual amino acid sequences from DnaSP. Two  
237 different predictions tools predicted the promiscuous HLA-class II binding sites and human T-  
238 cell epitopes: IEDB analysis resource T-cell epitope prediction tools  
239 ([http://tools.immuneepitope.org/main/html/tcell\\_tools.html](http://tools.immuneepitope.org/main/html/tcell_tools.html)) [57,58] and ProPred MHC class II  
240 binding prediction server (<http://www.imtech.res.in/raghava/propred/>) [59]. For the 51 HLA  
241 alleles tested in ProPred, thresholds included a promiscuous search set to 3%. For the 27 HLA  
242 alleles tested in IEDB, only predicted peptides with a Consensus percentile rank of 0.10 or below  
243 are included as the top 10% of peptides with the strongest predicted binding affinity.

### 244 **Results**

245 Using previously published PpSP15 [24] data as a guide to help highlight the proteins  
246 presented in this study, we would prioritize PpSP12 and PpSP14 for vaccine development  
247 according to our in-depth analyses presented below. The remaining seven salivary proteins may  
248 be valid vaccine components; however, the extent of the allelic variation present suggests that  
249 their development as vaccine components may prove challenging. Herein, we present data for

250 PpSP28 as a representative salivary protein with PpSP29, PpSP30, PpSP32, PpSP36, PpSP42,  
251 and PpSP44 provided in the supplemental materials.

## 252 **PpSP12 in-depth analyses**

253 **Nucleotide and amino acid genetic diversity.** The 291 bp *PpSP12* fragment produced 14  
254 polymorphic sites (Fig 2A). Two specific nucleotide positions indicate limited heterogeneity  
255 between the Jordan populations compared to the Egypt population. Position one shows  
256 conservation of adenine in both Jordan populations with variation present in the Egypt  
257 population. Conversely, in position 13 the conserved frequency of adenine is greater in the  
258 Aswan population in comparison to both Malka and Swaimah. All of the populations present  
259 similar heterogeneity at positions 6-9. Although heterogeneity exists in *PpSP12*, it is the lowest  
260 when comparing all 9 salivary proteins. The translated PpSP12 amino acid sequence has 6  
261 variable positions out of 97 total amino acids (Fig 2B). At position 2, arginine and lysine are  
262 both found in all populations. Both arginine and lysine are positively-charged and belong to the  
263 basic group of amino acids. They are frequently substituted for each other in nature [60]. The  
264 frequency of alanine and proline are relatively equal for all populations in position 4. Both of  
265 these amino acids are small in size, nonpolar, and hydrophobic. At position 3 and 5, the relative  
266 frequencies of lysine and asparagine are the same except the Aswan population at position 5 has  
267 a much higher frequency of lysine. Lysine is a positively charged polar amino acid and  
268 asparagine is polar but neutrally charged. Both are frequently found in protein active, or binding,  
269 sites [60].

## 270 **Fig 2. PpSP12 nucleotide and amino acid variation.**

271 (A) Weblogo illustrating the relative frequencies of nucleotide polymorphisms in wild caught *P.*  
272 *papatasi* populations from PPAW, PPJM, and PPJS. (B) Weblogo illustrating the relative

273 frequencies of amino acid polymorphisms in wild caught *P. papatasi* populations from PPAW,  
274 PPJM, and PPJS.

275 **Population genetics analysis.** A total of 96 mature cDNA sequences were analyzed for *PpSPI2*  
276 from Aswan (n=26), Malka (n=29), and Swaimeh (n=41). Twenty-nine haplotypes were  
277 identified with 14 variant sites. Of the 29 haplotypes, 22 were found in only one of the  
278 geographic study sites and 6 of the 7 shared haplotypes were found in 2 populations. One  
279 haplotype, H\_1, was present in all 3 populations and was the most common haplotype. The  
280 Aswan, Egypt, population had 5 unique haplotypes (H\_2, H\_3, H\_5, H\_8, H\_9) with 3 of those  
281 being private haplotypes (H\_5, H\_8, H\_9). The Malka, Jordan, population exhibited 9 unique  
282 haplotypes (H\_10, H\_13, H\_14, H\_15, H\_16, H\_18, H\_19, H\_20, H\_21) with 6 of the 9 being  
283 private haplotypes (H\_10, H\_14, H\_15, H\_18, H\_19, H\_20). The Swaimeh, Jordan, population  
284 demonstrated 8 unique haplotypes (H\_22 to H\_29) with 3 private haplotypes (H\_22, H\_24,  
285 H\_25). A variety of population genetics parameters were assessed (Table 2) indicating genetic  
286 homogeneity for *PpSPI2* across the three populations. Tajima's D and Ka/Ks analysis indicated  
287 that this protein is not undergoing positive selection but rather it is either neutral or possibly  
288 experiencing purifying selection (Table 2). Furthermore, population structure is not indicated as  
289 Fst uncovered little genetic variability in pairwise comparisons (Table 3). The *PpSPI2* median-  
290 joining network does not demonstrate any notable clustering separating the different populations  
291 from one another (Fig 3). Although there are 29 total haplotypes, the haplotypes are  
292 differentiated from one another by only one mutation. The Ka/Ks ratio, a diversifying selection  
293 index, was 0.293 or less across the sliding window analysis of the protein for all populations  
294 indicating purifying or stabilizing selection of this protein (Table 4).

295

296 **Table 2. PpSP12 population genetics analyses for *P. papatasi* populations**

| Population                                       | All Data                                          | PPAW                                | PPJM                                          | PPJS                                              |
|--------------------------------------------------|---------------------------------------------------|-------------------------------------|-----------------------------------------------|---------------------------------------------------|
| Number of Sequences                              | 96                                                | 26                                  | 29                                            | 41                                                |
| Number of Sites                                  | 291                                               | 291                                 | 291                                           | 291                                               |
| - Monomorphic                                    | 277                                               | 282                                 | 281                                           | 279                                               |
| - Polymorphic                                    | 14                                                | 9                                   | 10                                            | 12                                                |
| Singleton variable sites                         | 2                                                 | 1                                   | 0                                             | 1                                                 |
| - Site positions                                 | 64, 260                                           | 260                                 | -                                             | 64                                                |
| Parsimony informative sites                      | 11                                                | 8                                   | 10                                            | 11                                                |
| - Site positions                                 | 36, 54, 74, 75, 108, 117, 124, 126, 138, 150, 252 | 36, 54, 74, 108, 114, 117, 124, 252 | 54, 74, 75, 108, 114, 117, 124, 126, 150, 252 | 36, 54, 74, 75, 108, 114, 117, 124, 126, 138, 252 |
| Segregating sites (S)                            | 14                                                | 9                                   | 10                                            | 12                                                |
| Total number of mutations (Eta)                  | 16                                                | 10                                  | 11                                            | 12                                                |
| Total number of synonymous changes               | 10                                                | 5                                   | 7                                             | 7                                                 |
| - Site positions                                 | 36, 54, 75, 108, 114, 114, 114, 126, 138, 150,    | 36, 54, 108, 114, 114               | 54, 75, 108, 114, 114, 126, 150               | 6, 54, 75, 108, 114, 126, 138                     |
| Total number of replacement changes              | 6                                                 | 5                                   | 4                                             | 5                                                 |
| - Site positions                                 | 64, 74, 117, 124, 252, 260                        | 74, 117, 124, 252, 260              | 74, 117, 124, 252                             | 64, 74, 117, 124, 252                             |
| Number of haplotypes                             | 29                                                | 9                                   | 14                                            | 14                                                |
| Haplotype diversity (Hd)                         | 0.723                                             | 0.58145                             | 0.81307                                       | 0.68473                                           |
| - Standard deviation of Hd                       | 0.034                                             | 0.076                               | 0.034                                         | 0.055                                             |
| Nucleotide diversity (Pi)                        | 0.01063                                           | 0.00864                             | 0.01139                                       | 0.01089                                           |
| - Standard deviation of Pi                       | 0.00067                                           | 0.00135                             | 0.00105                                       | 0.00102                                           |
| Theta (per site) from Eta                        | 0.00943                                           | 0.00760                             | 0.00817                                       | 0.00828                                           |
| Theta (per site) from S (Theta-W)                | 0.00825                                           | 0.00684                             | 0.00742                                       | 0.00828                                           |
| - Standard deviation of theta (no recombination) | 0.00279                                           | 0.00288                             | 0.00300                                       | 0.00310                                           |
| - Standard deviation of                          | 0.00220                                           | 0.00228                             | 0.00235                                       | 0.00239                                           |

|                                              |          |         |          |         |
|----------------------------------------------|----------|---------|----------|---------|
| theta (free recombination)                   |          |         |          |         |
| Theta (per site) from Pi                     | 0.01078  | 0.00874 | 0.01157  | 0.01105 |
| Average number of nucleotide differences (k) | 3.094    | 2.51357 | 3.31579  | 3.16893 |
| Theta estimated from Eta                     | 2.743    | 2.21297 | 2.376    | 2.411   |
| Fu and Li's D test statistic                 | -0.72468 | 0.15876 | 0.84321  | 0.86940 |
| - Statistical significance                   | NS       | NS      | NS       | NS      |
| Fu and Li's F test statistic                 | -0.38441 | 0.27545 | 1.10728  | 1.02795 |
| - Statistical significance                   | NS       | NS      | NS       | NS      |
| Tajima's D                                   | 0.33033  | 0.38568 | 1.12200  | 0.85937 |
| - Statistical significance                   | NS       | NS      | NS       | NS      |
| Synonymous sites Tajima's D(Syn)             | -0.19687 | 0.57799 | 0.16187  | 0.43992 |
| - Statistical significance                   | NS       | NS      | NS       | NS      |
| Nonsynonymous sites Tajima's D(Nonsyn)       | 0.98069  | 0.07503 | 2.14787  | 1.10242 |
| - Statistical significance                   | NS       | NS      | NS       | NS      |
| Silent sites Tajima's D(Sil)                 | -0.19687 | 0.57799 | 0.16187  | 0.43992 |
| - Statistical significance                   | NS       | NS      | NS       | NS      |
| Tajima's D (Nonsyn/Syn) ratio                | -4.98139 | 0.12982 | 13.26885 | 2.50597 |
| $\omega$ (Ka/Ks)                             | ---      | 0.222   | 0.284    | 0.242   |

297 NS= $p > 0.10$ ; NS<sup>1</sup>= $0.10 > p > 0.05$ ; \*= $p < 0.05$

298

299 **Table 3. *PpSPI2* pairwise comparisons of genetic differentiation estimates.**

| POP 1 | POP 2 | Hs      | Ks      | Gst     | Fst      | Dxy     | Da      |
|-------|-------|---------|---------|---------|----------|---------|---------|
| PPAW  | PPJM  | 0.70381 | 2.93656 | 0.05362 | 0.06720  | 0.01074 | 0.00072 |
| PPAW  | PPJS  | 0.64501 | 2.91461 | 0.01242 | 0.03412  | 0.01011 | 0.00034 |
| PPJM  | PPJS  | 0.73758 | 3.22977 | 0.02492 | -0.00011 | 0.01114 | 0.00000 |

300

301 **Fig 3. Median-joining network for PpSP12 *P. papatasi* haplotypes.**

302 Circle size and circle color indicates frequency and geographical location of haplotypes,  
303 respectively. Haplotype numbers are written next to the corresponding circle H\_XX. Red  
304 numbers between haplotypes indicate number of mutations between haplotypes.

305 **Table 4. PpSP12 sliding window analysis.**

| Ka/Ks          |       |       |       |
|----------------|-------|-------|-------|
| Sliding Window | PPAW  | PPJM  | PPJS  |
| 1-70           | 0.000 | 0.000 | 0.013 |
| 71-140         | 0.293 | 0.256 | 0.213 |
| 141-210        | 0.000 | 0.000 | 0.000 |
| 211-280        | ----  | ----  | ----  |
| 281-291        | 0.000 | 0.000 | 0.000 |

306 Ka/Ks were plotted for every 70 codons. Values greater than one suggest the potential for  
307 positive selection. ---- indicates a lack of polymorphic data in the window to calculate a Ka/Ks  
308 value.

309 **Secondary structure & T-cell epitope predictions.** The mature amino acid sequence for  
310 PpSP12 predicted that only one polymorphic site (R60) was found in an  $\alpha$ -helix whereas the  
311 other six polymorphic sites were found in predicted coils (D57, K74, A77, K119, N122) (Fig 4).  
312 All 6 polymorphic sites are found in predicted MHC II T-cell epitope binding sites though this  
313 should not interfere with the potential for T-cell activation as the polymorphic sites are found in  
314 the middle of the predicted binding sites and surrounded by conserved regions. Of the 140 amino  
315 acids included in this analysis, 95 amino acids were predicted to be potential epitope recognition  
316 sites. The areas of the amino acid sequence with the highest predicted binding affinities occur



317 between the lysine residue at position 2 (K2) and the proline residue at position 23 (P23) as well  
318 as the tyrosine residue at position 110 (Y110) and the asparagine residue at position 138 (N138).  
319 Of the 78 total HLA alleles tested using the two software tools, all 51 alleles from ProPred  
320 identified potential binding sites though certain alleles, such as DRB1\_03, DRB1\_11, and  
321 DRB1\_13, had greater binding affinities than the others. The alleles with the strongest binding  
322 affinity potential identified by IEDB software included DQA1\_0401/DQB1\_0402,  
323 DPA1\_0103/DPB1\_0201, and DRB1\_0301. The DQA1/DQB1 and DPA1/DPB1 alleles  
324 demonstrated a greater affinity for residues between K2 to A20 and DRB1\_0301 demonstrated a  
325 greater affinity for Y110 to F126, bookending the mature PpSP12.

326 **Fig 4. PpSP12 secondary structure, polymorphic sites, and MHC class II epitope**  
327 **predictions.**

328 The mature PpSP12 amino acid sequence predicted secondary structure. Yellow highlighted  
329 amino acids indicate the predicted MHC class II predicted promiscuous peptides. Individual  
330 amino acids underlined in black indicate unique polymorphic sites. Predicted secondary structure  
331 based on sequence accession #AGE83083[13].

332

333 **PpSP14 in-depth analyses**

334 **Nucleotide and amino acid genetic diversity.** The 246-bp *PpSP14* fragment produced 23  
335 polymorphic sites (Fig 5A). Similar to *PpSP12*, there exists limited heterogeneity between the  
336 populations studied. Position 11 demonstrates variation in all 3 populations with equal  
337 representation of adenine and guanine. In position 17, the Jordan populations have roughly equal  
338 rates of cytosine and guanine but the Egypt population has cytosine in the majority. Guanine  
339 dominates at position 21 in both Jordan populations but is equally represented with cytosine in

340 the Egypt population. The remaining 20 polymorphic sites present similar levels of heterogeneity  
341 across all 3 populations. The translated PpSP14 amino acid sequence has 14 variable positions  
342 out of 82 total amino acids (Fig 5B). At position 1 and 3, leucine, valine, and isoleucine are all  
343 easily substituted for one another since they are hydrophobic and prefer to be buried in the  
344 protein core. In position 5, the Aswan, Egypt, population demonstrates limited substitution of the  
345 asparagine amino acid with lysine, both polar amino acids. Lysine and arginine are relatively  
346 equal for all populations at position 8. Lysine and arginine belong to the same basic amino acid  
347 group and are known substitutions for one another [60]. Serine and threonine, position 13, are  
348 also easily substituted for one another but more threonine is found in the Egypt population  
349 compared to the Jordan populations. At position 10, threonine and alanine substitutions are found  
350 in all populations but are more frequent in the Egypt population. Even though threonine is polar  
351 and alanine is nonpolar, both are small amino acids and threonine's versatility of being inside or  
352 outside of the protein, the substitution can be functionally sound. At position 11, threonine is  
353 substituted by isoleucine in both Jordanian populations. Even though isoleucine is hydrophobic  
354 and threonine is polar, threonine may be on the inside of this protein making this substitution  
355 possible, similar to the substitution at position 10 [60].

356 **Fig 5. PpSP14 nucleotide and amino acid variation.**

357 (A) Weblogo illustrating the relative frequencies of nucleotide polymorphisms in wild caught *P.*  
358 *papatasi* populations from PPAW, PPJM, and PPJS. (B) Weblogo illustrating the relative  
359 frequencies of amino acid polymorphisms in wild caught *P. papatasi* populations from PPAW,  
360 PPJM, and PPJS.

361 **Population genetics analysis.** A total of 119 mature cDNA sequences were analyzed for  
362 *PpSP14* from PPAW (n=29), PPJM (n=44), and PPJS (n=46). Thirty-eight haplotypes 23 variant

363 sites. Of the 38 haplotypes, 25 were found in only one of the geographic study sites, 8 were  
364 shared between PPAW/PPJM or PPJM/PPJS, but none were shared by PPAW/PPJS. Five  
365 haplotypes were present in all three populations (H\_1, H\_5, H\_8, H\_10, H\_13), with H\_5 the  
366 most common haplotype. PPAW had 6 unique haplotypes (H\_3, H\_7, H\_9, H\_11, H\_12, H\_14)  
367 with 1 of those designated a private haplotype (H\_3). PPJM had 8 unique haplotypes (H\_16,  
368 H\_18, H\_21, H\_22, H\_23, H\_25, H\_26, H\_27) with 6 of the 8 being private haplotypes (H\_16,  
369 H\_18, H\_22, H\_23, H\_25, H\_26). PPJS had 11 unique haplotypes (H\_28, H\_29, H\_30, H\_31,  
370 H\_32, H\_33, H\_34, H\_35, H\_36, H\_37, H\_38) with 6 of the 11 being private haplotypes (H\_31,  
371 H\_32, H\_33, H\_36, H\_37, H\_38). The population genetics assessment indicates genetic  
372 homogeneity for *PpSP14* across the 3 populations (Table 5). Although the Tajima's D values  
373 were negative across all populations, the values were not significant and do not deviate far from  
374 zero indicating no selection. The majority of Ka/Ks values are under 1 or do not deviate far from  
375 1 further indicating no selection acting on *PpSP14*. There is the potential for population  
376 structuring as  $F_{st}$  demonstrated moderate genetic differentiation between PPAW and PPJM  
377 (0.10771) and PPAW and PPJS (0.09091) and little genetic differentiation between PPJM and  
378 PPJS (0.02346) (Table 6). The *PpSP14* median joining network does not demonstrate any  
379 significant clustering separating the different populations from one another (Fig 6). The PPJS  
380 haplotypes might be clustering together as compared to PPAW and PPJM but the 38 haplotypes  
381 are differentiated from one another by only one mutation. The only exception being haplotypes  
382 H\_7 and H\_12, both from PPAW are differentiated by 3 mutations from one another. The Ka/Ks  
383 ratio in the sliding window from 141-210 indicated potential positive selection in both PPJM and  
384 PPJS populations but not in the PPAW population (Table 7).  
385

386 **Table 5. PpSP14 population genetics analyses for *P. papatasi* populations.**

| Population                          | All Data                                                                                        | PPAW                                                       | PPJM                                             | PPJS                                                      |
|-------------------------------------|-------------------------------------------------------------------------------------------------|------------------------------------------------------------|--------------------------------------------------|-----------------------------------------------------------|
| Number of Sequences                 | 119                                                                                             | 29                                                         | 44                                               | 46                                                        |
| Number of Sites                     | 246                                                                                             | 246                                                        | 246                                              | 246                                                       |
| - Monomorphic                       | 223                                                                                             | 233                                                        | 233                                              | 232                                                       |
| - Polymorphic                       | 23                                                                                              | 13                                                         | 13                                               | 14                                                        |
| Singleton variable sites            | 2                                                                                               | 0                                                          | 2                                                | 1                                                         |
| - Site positions                    | 147, 232                                                                                        | -                                                          | 147, 232                                         | 183                                                       |
| Parsimony informative sites         | 21                                                                                              | 13                                                         | 11                                               | 13                                                        |
| - Site positions                    | 1, 14, 49, 54, 69, 75, 99, 116, 129, 133, 143, 151, 154, 156, 162, 179, 181, 183, 216, 221, 231 | 1, 14, 49, 99, 129, 143, 154, 156, 162, 179, 181, 183, 221 | 1, 14, 49, 54, 116, 143, 154, 179, 183, 221, 231 | 1, 49, 54, 69, 75, 116, 133, 143, 151, 154, 179, 216, 221 |
| Segregating sites (S)               | 23                                                                                              | 13                                                         | 13                                               | 14                                                        |
| Total number of mutations (Eta)     | 24                                                                                              | 14                                                         | 13                                               | 14                                                        |
| Total number of synonymous changes  | 8                                                                                               | 3                                                          | 4                                                | 4                                                         |
| - Site positions                    | 54, 69, 129, 147, 156, 162, 216, 231                                                            | 129, 156, 162                                              | 54, 147, 183, 231                                | 54, 69, 183, 216                                          |
| Total number of replacement changes | 13                                                                                              | 8                                                          | 9                                                | 10                                                        |
| - Site positions                    | 1, 14, 49, 75, 99, 116, 133, 143, 151, 154, 179, 221, 232                                       | 1, 14, 49, 99, 143, 154, 179, 221                          | 1, 14, 49, 116, 143, 154, 179, 221, 232          | 1, 49, 75, 116, 133, 143, 151, 154, 179, 221              |
| Number of haplotypes                | 38                                                                                              | 15                                                         | 20                                               | 21                                                        |
| Haplotype diversity (Hd)            | 0.870                                                                                           | 0.876                                                      | 0.833                                            | 0.874                                                     |
| - Standard deviation of Hd          | 0.013                                                                                           | 0.029                                                      | 0.026                                            | 0.019                                                     |
| Nucleotide diversity (Pi)           | 0.00817                                                                                         | 0.00905                                                    | 0.00657                                          | 0.00814                                                   |
| - Standard deviation of Pi          | 0.00046                                                                                         | 0.00102                                                    | 0.00056                                          | 0.00070                                                   |
| Theta (per site) from S (Theta-W)   | 0.01546                                                                                         | 0.01142                                                    | 0.01047                                          | 0.01117                                                   |
| - Standard deviation of             | 0.00450                                                                                         | 0.00430                                                    | 0.00381                                          | 0.00397                                                   |

|                                                    |                 |          |          |          |
|----------------------------------------------------|-----------------|----------|----------|----------|
| theta (no recombination)                           |                 |          |          |          |
| - Standard deviation of theta (free recombination) | 0.00322         | 0.00317  | 0.00290  | 0.00299  |
| Theta (per site) from Pi                           | 0.00825         | 0.00916  | 0.00663  | 0.00823  |
| Average number of nucleotide differences (k)       | 2.009           | 2.226    | 1.616    | 2.003    |
| Theta estimated from Eta                           | 3.969           | 3.024    | 2.575    | 2.749    |
| Fu and Li's D test statistic                       | 0.46088         | 1.04412  | 0.35095  | 0.99210  |
| - Statistical significance                         | NS              | NS       | NS       | NS       |
| Fu and Li's F test statistic                       | -0.32793        | 0.49487  | -0.16267 | 0.43593  |
| - Statistical significance                         | NS              | NS       | NS       | NS       |
| Tajima's D                                         | -1.33534        | -0.78153 | -1.02243 | -0.75052 |
| - Statistical significance                         | NS              | NS       | NS       | NS       |
| Synonymous sites Tajima's D(Syn)                   | -1.63036        | -0.83456 | -1.08859 | -1.12766 |
| - Statistical significance                         | NS <sup>1</sup> | NS       | NS       | NS       |
| Nonsynonymous sites Tajima's D(Nonsyn)             | -0.63507        | -0.12244 | -0.76166 | -0.40308 |
| - Statistical significance                         | NS              | NS       | NS       | NS       |
| Silent sites Tajima's D(Sil)                       | -1.6306         | -0.83456 | -1.08859 | -1.12766 |
| - Statistical significance                         | NS <sup>1</sup> | NS       | NS       | NS       |
| Tajima's D (Nonsyn/Syn) ration                     | 0.38953         | 0.14672  | 0.69967  | 0.35745  |
| $\omega$ (Ka/Ks)                                   | ---             | 0.877    | 0.879    | 1.242    |

387 NS= $p > 0.10$ ; NS<sup>1</sup>= $0.10 > p > 0.05$ ; \*= $p < 0.05$

388

389

390 **Table 6. *PpSP14* pairwise comparisons of genetic differentiation estimates.**

| POP 1 | POP 2 | Hs      | Ks      | Gst     | Fst     | Dxy     | Da      |
|-------|-------|---------|---------|---------|---------|---------|---------|
| PPAW  | PPJM  | 0.84968 | 1.85842 | 0.01880 | 0.10771 | 0.00875 | 0.00094 |
| PPAW  | PPJS  | 0.87453 | 2.08910 | 0.01161 | 0.09091 | 0.00945 | 0.00086 |
| PPJM  | PPJS  | 0.85355 | 1.81360 | 0.00205 | 0.02346 | 0.00753 | 0.00018 |

391

392 **Fig 6. Median-joining network for *PpSP14 P. papatasi* haplotypes.**

393 Circle size and circle color indicates frequency and geographical location of haplotypes,  
 394 respectively. Haplotype numbers are written next to the corresponding circle H\_XX. Red  
 395 numbers between haplotypes indicate number of mutations between haplotypes.

396 **Table 7. *PpSP14* sliding window analysis.**

| Ka/Ks          |       |       |        |
|----------------|-------|-------|--------|
| Sliding Window | PPAW  | PPJM  | PPJS   |
| 1-70           | ----  | 0.322 | 0.242  |
| 71-140         | 0.748 | ----  | ----   |
| 141-210        | 0.541 | 1.868 | 14.944 |
| 211-246        | ----  | 0.330 | 0.220  |

397 Ka/Ks were plotted for every 70 codons. Values greater than one suggest the potential for  
 398 positive selection. ---- indicates a lack of polymorphic data in the window to calculate a Ka/Ks  
 399 value.

400

401 **Secondary structure & T-cell epitope predictions.** The mature amino acid sequence for  
 402 *PpSP14* predicted that 6 polymorphic sites (L65, K79, A85, K88, V91, T92) were found in  $\alpha$ -  
 403 helices whereas the other 8 polymorphic sites were found in predicted coils (L41, F45, I57, N73,  
 404 T100, P101, S114, L118) (Fig 7). Twelve of the 14 polymorphic sites were found in predicted  
 405 MHC II T-cell epitope binding sites. This variability may affect the predicted binding sites found

406 between amino acids L41 and K58 and between amino acids L87 and C103, as the variable sites  
407 are found at the beginning and end of the fragment. There are no polymorphic sites found  
408 between amino acids M1 and F19. The variable sites found between H61 and A77 and I106 and  
409 T134 are found in the middle of the amino acid fragment and should not hinder binding. Of the  
410 142 amino acids included in this analysis, 100 amino acids were predicted to be potential epitope  
411 recognition sites. The software prediction tools, IEDB and ProPred, agree that the areas of the  
412 amino acid sequence with the highest predicted binding affinities occur between methionine  
413 residue at position 1 (M1) and the phenylalanine residue at position 19 (F19) as well as the  
414 isoleucine residue at position 106 (I106) and the threonine residue at position 134 (T134).  
415 Similar to PpSP12, all 51 alleles from ProPred identified potential binding sites, particularly  
416 between residues M1 and F19. Alleles DRB1\_04XX, DRB1\_08XX, DRB1\_11XX,  
417 DRB1\_13XX, and DRB1\_15XX had the highest binding affinities overall. To a lesser extent, the  
418 following alleles were also identified DRB1\_010X, DRB1\_030X, DRB1\_070X, and  
419 DRB5\_010X. The alleles with the strongest binding affinity potential identified by IEDB  
420 software included DRB3\_0101, DPA1\_0301/DPB1\_0402, DRB1\_1101,  
421 DAQ1\_0101/DQB1\_0501, DPA1\_0103/DPB1\_0201, DRB1\_0301, DPA1\_0201/DPB1\_0101,  
422 and DRB5\_0101.

423 **Fig 7. PpSp14 secondary structure, polymorphic sites, and MHC class II epitope**  
424 **predictions.**

425 The mature PpSP14 amino acid sequence predicted secondary structure. Yellow highlighted  
426 amino acids indicate the predicted MHC class II predicted promiscuous peptides. Individual  
427 amino acids underlined in black indicate unique polymorphic sites. Predicted secondary structure  
428 based on sequence accession #AGE83089[13].

## 429 **PpSP28 In-depth Analyses**

430 **Nucleotide and amino acid genetic diversity.** The 651-bp *PpSP28* fragment produced 95  
431 polymorphic sites (Fig 8A). Approximately, 61% of the polymorphic sites are transition  
432 substitutions and 26% are transversions. The remaining 12% of polymorphic sites are mostly  
433 conserved as the number of substitutions are so few. Positions 50 and 90 have three possible  
434 options at this site, each site a different combination of guanine, cytosine, adenine, or thymine.  
435 The translated PpSP28 amino acid sequence has 53 variable positions out of 184 total amino  
436 acids (Fig 8B). Eighteen of the variable sites demonstrate limited heterogeneity while the other  
437 35 sites demonstrate significant variation between the populations and an abundance of amino  
438 acid substitutions. PpSP28 exhibits the greatest nucleotide and amino acid sequence variability  
439 of all 9 salivary proteins studied (Fig 8).

### 440 **Fig 8. PpSP28 nucleotide and amino acid variation.**

441 (A) Weblogo illustrating the relative frequencies of nucleotide polymorphisms in wild caught *P.*  
442 *papatasi* populations from PPAW, PPJM, and PPJS. (B) Weblogo illustrating the relative  
443 frequencies of amino acid polymorphisms in wild caught *P. papatasi* populations from PPAW,  
444 PPJM, and PPJS.

445 **Population genetics analysis.** A total of 111 mature cDNA sequences were analyzed for  
446 *PpSP28* from Aswan (n=26), Malka (n=30), and Swaimeh (n=55). Ninety-five variant sites were  
447 identified in 122 haplotypes. Swaimeh, Jordan, tallied the most unique haplotypes (62) with 46  
448 identified as private. Malka, Jordan, had 21 unique haplotypes with 16 identified as private.  
449 Aswan, Egypt, totaled 30 unique haplotypes with 24 identified as private. One haplotype was  
450 shared by all 3 populations (H\_1) and 9 haplotypes were shared by 2 populations. As with  
451 *PpSP12* and *PpSP14*, various population genetics parameters were assessed (Table 8) indicating



452 heterogeneity among the populations. Although significant variation is present in *PpSP28*, the  
 453 analyses do not indicate that positive selection is acting on this salivary protein (Table 8).  
 454 Population pairwise comparisons, like *Fst*, reveal great genetic differentiation, according to  
 455 Wright (1978) between Aswan, Egypt, and Malka, Jordan at 0.10913, and moderate genetic  
 456 differentiation between Aswan, Egypt, and Swaimeh, Jordan at 0.06936 (Table 9). There is little  
 457 genetic differentiation between Malka, Jordan, and Swaimeh, Jordan, at 0.01595. The median  
 458 joining network for *PpSP28* similarly does not exhibit any clear clustering of the Egypt or Jordan  
 459 populations, but there are as many as 11 mutations separating connected haplotypes (Fig 9).  
 460 *PpSP28* sliding window analysis of *Ka/Ks* demonstrates the potential for *PpSP28* to be under  
 461 diversifying selection in several areas in contrast to the majority of the protein under purifying  
 462 selection in all populations (Table 10). Values higher than one were detected in all 3 populations  
 463 with PPJM having two sliding window regions with values over one compared to one sliding  
 464 window region in PPJS and PPAW (Table 10).

465 **Table 8. PpSP28 population genetics analyses for *P. papatasi* populations.**

| Population                  | All Data                                                                                                    | PPAW                                                                                                       | PPJM                                                                                                        | PPJS                                                                                                         |
|-----------------------------|-------------------------------------------------------------------------------------------------------------|------------------------------------------------------------------------------------------------------------|-------------------------------------------------------------------------------------------------------------|--------------------------------------------------------------------------------------------------------------|
| Number of Sequences         | 111                                                                                                         | 26                                                                                                         | 30                                                                                                          | 55                                                                                                           |
| Number of Sites             | 554                                                                                                         | 554                                                                                                        | 554                                                                                                         | 554                                                                                                          |
| - Monomorphic               | 495                                                                                                         | 482                                                                                                        | 485                                                                                                         | 475                                                                                                          |
| - Polymorphic               | 95                                                                                                          | 72                                                                                                         | 69                                                                                                          | 79                                                                                                           |
| Singleton variable sites    | 9                                                                                                           | 8                                                                                                          | 4                                                                                                           | 5                                                                                                            |
| - Site positions            | 41, 42, 59, 94, 167, 219, 311, 392, 405                                                                     | 41, 59, 94, 286, 327, 389, 391, 392                                                                        | 8, 70, 157, 391                                                                                             | 42, 167, 219, 311, 405                                                                                       |
| Parsimony informative sites | 86                                                                                                          | 64                                                                                                         | 65                                                                                                          | 74                                                                                                           |
| - Site positions            | 3, 6, 8, 9, 35, 40, 58, 64, 66, 67, 68, 70, 73, 79, 80, 81, 84, 93, 104, 105, 122, 129, 130, 131, 132, 142, | 3, 6, 8, 9, 40, 64, 67, 68, 70, 73, 79, 80, 84, 93, 105, 122, 129, 130, 131, 142, 205, 206, 229, 233, 251, | 3, 6, 9, 35, 40, 58, 64, 66, 67, 68, 79, 80, 84, 93, 104, 105, 122, 129, 130, 131, 132, 200, 229, 233, 239, | 3, 6, 8, 9, 35, 40, 58, 64, 66, 67, 68, 70, 79, 80, 81, 84, 93, 104, 105, 122, 129, 130, 131, 132, 157, 200, |

|                                     |                                                                                                                                                                                                                                                                         |                                                                                                                                                                                                   |                                                                                                                                                                                                        |                                                                                                                                                                                                                                                     |
|-------------------------------------|-------------------------------------------------------------------------------------------------------------------------------------------------------------------------------------------------------------------------------------------------------------------------|---------------------------------------------------------------------------------------------------------------------------------------------------------------------------------------------------|--------------------------------------------------------------------------------------------------------------------------------------------------------------------------------------------------------|-----------------------------------------------------------------------------------------------------------------------------------------------------------------------------------------------------------------------------------------------------|
|                                     | 157, 200, 205, 206, 229, 233, 239, 250, 251, 270, 273, 286, 302, 314, 325, 327, 329, 332, 345, 350, 362, 365, 386, 395, 401, 414, 416, 418, 423, 449, 450, 451, 459, 467, 469, 473, 476, 477, 481, 484, 486, 487, 502, 503, 510, 518, 525, 529, 530, 539, 544, 552, 553 | 270, 273, 302, 314, 325, 329, 332, 345, 349, 350, 353, 362, 365, 386, 395, 401, 414, 416, 418, 423, 449, 450, 451, 467, 473, 476, 481, 484, 486, 502, 503, 510, 518, 525, 529, 530, 539, 552, 553 | 250, 251, 270, 273, 286, 302, 314, 325, 329, 332, 345, 349, 350, 362, 377, 386, 395, 414, 416, 423, 438, 444, 449, 450, 459, 467, 469, 473, 476, 477, 481, 484, 486, 503, 510, 525, 529, 539, 544, 553 | 229, 233, 239, 251, 270, 273, 286, 302, 314, 325, 327, 329, 332, 345, 349, 350, 362, 377, 386, 389, 395, 414, 416, 423, 438, 444, 450, 451, 459, 467, 469, 473, 476, 477, 481, 484, 486, 487, 502, 503, 510, 518, 525, 529, 530, 539, 544, 552, 553 |
| Segregating sites (S)               | 95                                                                                                                                                                                                                                                                      | 72                                                                                                                                                                                                | 69                                                                                                                                                                                                     | 79                                                                                                                                                                                                                                                  |
| Total number of mutations (Eta)     | 107                                                                                                                                                                                                                                                                     | 75                                                                                                                                                                                                | 70                                                                                                                                                                                                     | 88                                                                                                                                                                                                                                                  |
| Total number of synonymous changes  | 34                                                                                                                                                                                                                                                                      | 27                                                                                                                                                                                                | 21                                                                                                                                                                                                     | 26                                                                                                                                                                                                                                                  |
| - Site positions                    | 35, 41, 59, 80, 104, 122, 122, 167, 200, 206, 233, 239, 251, 302, 311, 314, 332, 353, 362, 365, 377, 386, 386, 389, 392, 395, 401, 416, 423, 449, 467, 518, 525, 539, 539                                                                                               | 41, 59, 68, 80, 122, 206, 233, 251, 302, 332, 350, 353, 362, 365, 386, 389, 392, 395, 401, 416, 423, 449, 467, 518, 525, 530, 539                                                                 | 35, 80, 104, 122, 200, 233, 239, 251, 302, 329, 332, 350, 362, 377, 386, 395, 416, 423, 449, 467, 525                                                                                                  | 35, 80, 104, 122, 122, 167, 200, 233, 239, 251, 302, 311, 314, 332, 362, 377, 386, 386, 389, 395, 416, 423, 467, 518, 525, 530                                                                                                                      |
| Total number of replacement changes | 52                                                                                                                                                                                                                                                                      | 42                                                                                                                                                                                                | 43                                                                                                                                                                                                     | 44                                                                                                                                                                                                                                                  |
| - Site positions                    | 3, 6, 8, 9, 40, 42, 58, 64, 70, 73, 79, 81, 84, 93, 94, 105, 132, 142, 157, 205, 219, 229, 250, 270, 273, 286, 314, 325, 345, 349, 391, 414, 418, 423,                                                                                                                  | 3, 6, 8, 9, 40, 64, 67, 70, 73, 79, 84, 93, 94, 105, 142, 205, 229, 270, 273, 286, 314, 325, 345, 349, 391, 414, 418, 423,                                                                        | 3, 6, 8, 9, 40, 58, 64, 70, 79, 84, 93, 105, 132, 157, 229, 250, 270, 273, 286, 314, 325, 329, 345, 349, 391, 414, 438,                                                                                | 3, 6, 8, 9, 40, 42, 58, 64, 70, 79, 81, 84, 93, 105, 132, 157, 219, 229, 270, 273, 286, 314, 325, 345, 405, 414, 438, 444,                                                                                                                          |

|                                                    |                                                                                                                                             |                                                                                  |                                                                                               |                                                                                               |
|----------------------------------------------------|---------------------------------------------------------------------------------------------------------------------------------------------|----------------------------------------------------------------------------------|-----------------------------------------------------------------------------------------------|-----------------------------------------------------------------------------------------------|
|                                                    | 345, 391, 405,<br>414, 418, 423,<br>438, 444, 450,<br>451, 459, 469,<br>473, 476, 477,<br>481, 484, 486,<br>487, 510, 539,<br>544, 552, 553 | 450, 451, 473,<br>476, 481, 484,<br>486, 502, 503,<br>510, 529, 539,<br>552, 553 | 444, 450, 459,<br>469, 473, 476,<br>477, 481, 484,<br>486, 503, 510,<br>529, 539, 544,<br>553 | 450, 451, 459,<br>469, 473, 476,<br>477, 481, 484,<br>486, 487, 510,<br>529, 539, 552,<br>553 |
| Number of haplotypes                               | 122                                                                                                                                         | 33                                                                               | 28                                                                                            | 72                                                                                            |
| Haplotype diversity (Hd)                           | 0.9881                                                                                                                                      | 0.974                                                                            | 0.943                                                                                         | 0.991                                                                                         |
| - Standard deviation of Hd                         | 0.0022                                                                                                                                      | 0.00009                                                                          | 0.018                                                                                         | 0.003                                                                                         |
| Nucleotide diversity (Pi)                          | 0.03664                                                                                                                                     | 0.03798                                                                          | 0.03276                                                                                       | 0.03542                                                                                       |
| - Standard deviation of Pi                         | 0.00078                                                                                                                                     | 0.00114                                                                          | 0.00162                                                                                       | 0.00114                                                                                       |
| Theta (per site) from S (Theta-W)                  | 0.02869                                                                                                                                     | 0.02876                                                                          | 0.02671                                                                                       | 0.02704                                                                                       |
| - Standard deviation of theta (no recombination)   | 0.00666                                                                                                                                     | 0.00846                                                                          | 0.00770                                                                                       | 0.00703                                                                                       |
| - Standard deviation of theta (free recombination) | 0.00294                                                                                                                                     | 0.00339                                                                          | 0.00322                                                                                       | 0.00304                                                                                       |
| Theta (per site) from Pi                           | 0.03852                                                                                                                                     | 0.04001                                                                          | 0.03426                                                                                       | 0.03718                                                                                       |
| Average number of nucleotide differences (k)       | 20.299                                                                                                                                      | 21.04223                                                                         | 18.15085                                                                                      | 19.623                                                                                        |
| Theta estimated from Eta                           | 17.900                                                                                                                                      | 16.597                                                                           | 15.011                                                                                        | 16.688                                                                                        |
| Fu and Li's D test statistic                       | 0.7669                                                                                                                                      | 0.97403                                                                          | 1.56388                                                                                       | 1.26815                                                                                       |
| - Statistical significance                         | NS                                                                                                                                          | NS                                                                               | *                                                                                             | NS                                                                                            |
| Fu and Li's F test statistic                       | 0.71729                                                                                                                                     | 1.14769                                                                          | 1.48451                                                                                       | 1.16499                                                                                       |
| - Statistical significance                         | NS                                                                                                                                          | NS                                                                               | NS <sup>1</sup>                                                                               | NS                                                                                            |
| Tajima's D                                         | 0.41277                                                                                                                                     | 0.93781                                                                          | 0.71744                                                                                       | 0.57070                                                                                       |

|                                        |         |         |         |         |
|----------------------------------------|---------|---------|---------|---------|
| - Statistical significance             | NS      | NS      | NS      | NS      |
| Synonymous sites Tajima's D(Syn)       | 0.42640 | 0.61409 | 0.94295 | 0.62296 |
| - Statistical significance             | NS      | NS      | NS      | NS      |
| Nonsynonymous sites Tajima's D(Nonsyn) | 0.87413 | 1.20554 | 0.73109 | 0.77763 |
| - Statistical significance             | NS      | NS      | NS      | NS      |
| Silent sites Tajima's D(Sil)           | 0.42640 | 0.61409 | 0.94295 | 0.62296 |
| - Statistical significance             | NS      | NS      | NS      | NS      |
| Tajima's D (Nonsyn/Syn) ration         | 2.05003 | 1.96314 | 0.77532 | 1.24830 |
| $\omega$ (Ka/Ks)                       | ---     | 0.477   | 0.487   | 0.497   |

466 NS= $p > 0.10$ ; NS<sup>1</sup>= $0.10 > p > 0.05$ ; \*= $p < 0.05$

467

468 **Table 9. *PpSP28* pairwise comparisons of genetic differentiation estimates.**

| POP 1 | POP 2 | Hs      | Ks       | Gst     | Fst     | Dxy     | Da      |
|-------|-------|---------|----------|---------|---------|---------|---------|
| PPAW  | PPJM  | 0.95748 | 19.49328 | 0.02012 | 0.10931 | 0.03971 | 0.00434 |
| PPAW  | PPJS  | 0.98550 | 20.07880 | 0.00712 | 0.06936 | 0.03944 | 0.00274 |
| PPJM  | PPJS  | 0.97399 | 19.10365 | 0.01061 | 0.01595 | 0.03464 | 0.00055 |

469

470 **Fig 9. Median-joining network for *PpSP28 P. papatasi* haplotypes.**

471 Circle size and circle color indicates frequency and geographical location of haplotypes,

472 respectively. Haplotype numbers are written next to the corresponding circle H\_XX. Red

473 numbers between haplotypes indicate number of mutations between haplotypes.

474 **Table 10. *PpSP28* sliding window analysis.**

| Ka/Ks          |       |       |       |
|----------------|-------|-------|-------|
| Sliding Window | PPAW  | PPJM  | PPJS  |
| 1-71           | 1.506 | 1.329 | 1.437 |
| 72-141         | 0.624 | 0.427 | 0.482 |

|         |       |       |       |
|---------|-------|-------|-------|
| 142-211 | 0.413 | 0.059 | 0.254 |
| 212-281 | 0.453 | 0.473 | 0.571 |
| 282-351 | 0.852 | 0.570 | 0.756 |
| 352-421 | 0.031 | 0.038 | 0.024 |
| 422-491 | 0.391 | 0.890 | 0.862 |
| 492-554 | 0.845 | 1.333 | 0.534 |

475 Ka/Ks were plotted for every 70 codons. Values greater than one suggest the potential for  
476 positive selection.

477

478 **Secondary structure & T-cell epitope predictions.** The mature amino acid sequence for  
479 PpSP28 predicted a total of 53 polymorphic sites with 30 found in  $\alpha$ -helices whereas the other  
480 23 polymorphic sites were found in predicted coils (Fig 10). Twenty of the polymorphic sites are  
481 found in predicted MHC II T-cell epitope binding sites. Only 1 high affinity predicted binding  
482 site between residues M1 and S19 showed no variation. IEDB identified two alleles would  
483 recognize this region including DPA1\_0301/DPB1\_0402 and DPA1\_01/DPB1\_0401. The  
484 majority of the ProPred alleles recognized some combination of residues between M1 and Q28.  
485 Another conserved region was identified between residues F33 and S41 and was recognized by  
486 DRB1\_08XX, DRB1\_11XX, and DRB1\_13XX. The final region demonstrating conservation  
487 between residues L46 and L54 was recognized but by very few alleles. Two of the regions with  
488 the strongest affinities housed the most variation such as residues L71 to Q89, with 9 variant  
489 sites, and F195 to F203, with 4 variant sites. The high degree of variation within potential  
490 epitope binding sites and the decreased variety of alleles identified should exclude PpSP28 from  
491 further vaccine development.

492 **Fig 10. PpSp28 secondary structure, polymorphic sites, and MHC class II epitope**  
493 **predictions.**

494 The mature PpSP28 amino acid sequence predicted secondary structure. Yellow highlighted  
495 amino acids indicate the predicted MHC class II predicted promiscuous peptides. Individual  
496 amino acids underlined in black indicate unique polymorphic sites. Predicted secondary structure  
497 based on sequence accession #AGE83090 and #AGE83091[13].

498 **Multi-copy gene analysis for all salivary proteins**

499 Consistent with prior vector genome assemblies, variation within and/or between loci seems to  
500 have affected the initial assembly of SP proteins in this species. In general, comparing 2  
501 individual sand fly samples relative to the reference assembly implies that some SP proteins may  
502 exist as 2 separate loci given its coverage is significantly less than expected ( $p < 0.0002$ ; see  
503 Methods) using the Poisson-based coverage model of Lander and Waterman [46]. The only  
504 potential evidence of multiple copies occurred at the 3' terminal end of the second and third  
505 region (exon) of SP42 (2-3X expectation in both samples); however, other regions of the same  
506 gene were found less than expected ( $p < 0.0002$ ) (S2 Table). We conclude that there is no  
507 evidence of over assembly of SP proteins in the current Ppap reference assembly.

508 **Discussion**

509 We examined the genetic variability and potential immunogenicity of nine abundantly  
510 expressed *P. papatasi* salivary proteins with the overarching goal of identifying prospective targets  
511 to incorporate into an anti-leishmanial vaccine. The salivary proteins assessed included: PpSP12,  
512 PpSP14, PpSP28, PpSP29, PpSP30, PpSP32, PpSP36, PpSP42, and PpSP44. All sand flies  
513 collected from three natural populations were subjected to similar analyses outlined by Ramalho-  
514 Ortigão *et al.* (2015), to ascertain those salivary proteins that demonstrate similar characteristics

515 to PpSP15 as it has been extensively studied as a vaccine target [61]. A multitude of considerations  
516 must be addressed to characterize a salivary protein as a potential vaccine candidate, including  
517 genetic variability and conservation across populations, consistent expression, and  
518 immunogenicity like Th1 vs. Th2 response, and human MHC alleles. We recommend that PpSP12  
519 and PpSP14 be considered in vaccination strategies as these proteins are conserved across  
520 populations, demonstrate minimal variability, do not appear to be under selective pressure, and  
521 have the potential to activate the human immune system. PpSP28, PpSP29, PpSP32, PpSP36,  
522 PpSP42, or PpSP44 may be viable candidates for further vaccination applications but we would  
523 prioritize PpSP12 and PpSP14.

524 PpSP12 and PpSP14, exhibited a high degree of conservation at the nucleotide and amino  
525 acid levels (Figs 2 & 5) across all three populations studied. When our sampled sequences were  
526 aligned with previously published *P. papatasi* salivary protein gene sequences from Tunisia  
527 (*PpSP12* accession number JQ988874 and *PpSP14* accession number JQ988880)[13] and Israel  
528 (*PpSP12* accession number AF335485 and *PpSP14* accession number AF335486)[62], *PpSP12*  
529 and *PpSP14* demonstrated almost identical sequences with 95% and 91% percent identity shared,  
530 respectively (data not shown). This level of conservation across multiple populations beyond those  
531 included in this study demonstrates the potential for a vaccine with broad geographic coverage.  
532 Furthermore, the population genetics indices do not indicate that PpSP12 is under selective  
533 pressure. PpSP14 might be under slight selective pressure as evidenced by Tajima's D and Ka/Ks  
534 ratio though these values are not statistically significant (refer to S39 Table for summary  
535 information). In addition, a smaller number of nonsynonymous mutations or replacement changes  
536 are observed in PpSP12 (6) and PpSP14 (13) than in previous PpSP15 (19) analysis, further

537 suggesting PpSP12 and PpSP14 are not under positive selection pressures [24]. Nor do the median  
538 joining networks utilizing these genes indicate any clear population structuring.

539 PpSP12, PpSp14, and PpSP15 belong to the family of small odorant-binding proteins  
540 (OBP) but their specific functions are unknown. *Phlebotomus* OBPs are related to the D7 protein  
541 family that includes PpSP28 and PpSP30 and may have arose from a duplication event of a D7  
542 gene [13]. The high degree of conservancy among the OBPs demonstrated in this study mimics  
543 similar conservation of salivary proteins in geographically distant populations of *P. duboscqi* in  
544 Kenya and Mali [63]. *P. duboscqi* and *P. papatasi* belong to the same subgenus and are both known  
545 vectors of *Le. major*. The use of highly conserved salivary proteins across sand fly species to elicit  
546 a cross-protective effect would make the ideal vaccine, and cross protection against *Le. major*  
547 using salivary gland homogenate from *P. papatasi* and *P. duboscqi* using a murine model has been  
548 demonstrated [17]. Unfortunately, the same cross-protective phenomenon is not observed in  
549 phylogenetically distant species like *P. papatasi* and *Lu. longipalpis* [64]. Even though species  
550 specificity exists, cross protection may be possible across species that vector the same *Leishmania*  
551 parasites, i.e. *Le. major* vectored by *P. papatasi*, *P. duboscqi*, and *P. bergeroti*. Cross protection  
552 might theoretically be possible against sand flies that vector different *Leishmania* species but  
553 results in the same clinical disease outcome. For example, cross protection might be possible  
554 between *P. papatasi* and *P. sergenti* that vector *Le. major* and *Le. tropica*, respectively. However,  
555 this same phenomenon might not be possible with sand flies that vector *Leishmania* parasites that  
556 result in different clinical outcomes (i.e. cutaneous and visceral leishmaniasis) [17].

557 Gene expression is another important consideration in vaccine design as it relates to antigen  
558 dosage [65]. Salivary protein genes that are constitutively expressed are viable vaccine targets  
559 more so than those genes that change due to seasonality or other factors. Over the course of three



560 sand fly trappings (June, August, September), only *PpSP12* was significantly upregulated in  
561 September for the PPJS population but no significant change occurred in the other populations  
562 [41]. *PpSP14* did not experience a significant change in expression during the sampling season.  
563 Sugar content in plants from dry habitats, like Swaimeh, Jordan, varies in comparison to plants  
564 found in irrigated areas like Aswan, Egypt, suggesting that sugar source may be a principle factor  
565 in the differential expression demonstrated by *PpSP12*. Gene expression of *PpSP12* and *PpSP14*  
566 is influenced by diet and senescence [66]. In colony-reared, 3-day old sand flies, a 3.95 and 2.18-  
567 fold change was observed in blood-fed and sugar-fed flies respectively, compared to nonfed sand  
568 flies for *PpSP12*. For *PpSP14*, there was a 3.05-fold change in blood fed females compared to  
569 nonfed female sand flies. There was similar upregulation of both *PpSP12* and *PpSP14* at day 5  
570 and day 9 post-emergence. Though diet and senescence may influence salivary gland gene  
571 expression, environmental factors play a much larger role in gene expression regulation in wild  
572 populations [66]. Both *PpSP12* and *PpSP14* were expressed throughout seasonal trappings and  
573 when specifically tested for age or diet. Although these proteins are not considered constitutively  
574 expressed like *PpSP32*, they do not experience downregulation providing further evidence of their  
575 potential to provide a high enough antigen dose to prime the immune system for protection [65,66].

576 Another key aspect to vaccine development is the potential to elicit an immune response  
577 in human hosts. If certain salivary proteins are not predicted to interface with the appropriate  
578 human immune cells, then those salivary proteins should be excluded from further study. Both  
579 mature *PpSP12* and *PpSP14* proteins have multiple promiscuous MHC class II epitopes identified  
580 for presentation to T-cell receptors with limited variation in the potential epitope regions.  
581 Conversely, *PpSP28* demonstrates high variability in predicted epitope regions decreasing the  
582 bonding likelihood with MHC class II receptors. We also identified the MHC class II alleles

583 expected to recognize the salivary protein epitopes and investigated the predominant alleles of  
584 human populations living in Egypt and Jordan. The MHC class II alleles with strong binding  
585 affinities for PpSP12 that are also prevalent in Egyptian and Jordanian human populations include:  
586 DRB1\_0301, DRB1\_040X, DRB1\_110X, DRB1\_1301, and DRB1\_150X [67–69]. The MHC  
587 class II alleles identified for PpSP14 include: DRB1\_1101, DRB1\_0301, DRB1\_040X,  
588 DRB1\_11XX, DRB1\_13XX, DRB1\_15XX, and to a lesser extent DRB1\_070X [67–69]. The six  
589 remaining salivary proteins are predicted to bind to MHC class II alleles with varying affinity.  
590 PpSP36, PpSp42, and PpSP44 demonstrated greater binding affinities to multiple regions for each  
591 predicted protein structure but were not predicted to bind with the most prevalent alleles in the  
592 human populations from Egypt and Jordan (data not shown). PpSP29, PpSP30, and PpSP32,  
593 displayed fewer predicted binding regions with lower affinities for those regions (data not shown).  
594 The data from the prediction software tools adds to the mounting evidence in support of using  
595 PpSP12 and PpSP14 in vaccination strategies.

596         Of critical importance is whether these salivary proteins are recognized by human plasma.  
597 Although PpSP12 and PpSP14 are smaller in size than the other salivary proteins analyzed, they  
598 are less variable overall as there is less opportunity for mutations to occur. Even though larger  
599 proteins might be more immunogenic, our data, supported by previous studies, indicate that  
600 PpSP12 and PpSP14 will be recognized by alleles circulating in study areas [67–70]. Both PpSP12  
601 and PpSP14 are recognized by the immune system but antibody specificity differs among the  
602 human populations tested [70]. Our assessment of human responses included Egyptian and  
603 Jordanian residents (MENA donors) and U.S. military personnel deployed overseas. Eleven highly  
604 expressed salivary proteins were tested for their antibody specificity when compared to controls  
605 (i.e., MENA individuals not living in sand fly endemic regions or U.S. military that have not

606 traveled to *P. papatasi*-endemic regions). MENA donors displayed specificity to PpSP12, PpSP26,  
607 PpSP30, PpSP38, and PpSP44 but not PpSP14, whereas U.S. military displayed specificity to  
608 PpSP14 and PpSP38 but not PpSP12 [70]. In an independent study, it was shown that plasma  
609 antibody specificity of 200 Tunisian children ages 6 to 12 years old reacted to PpSP12, PpSP15,  
610 PpSP21, PpSP28, PpSP30, PpSP36, and PpSP44, but not to PpSP14 [19], emphasizing the impact  
611 of prolonged exposure to sand fly bites versus naïve individuals traveling to sand fly endemic areas  
612 [19,70]. Interestingly, PpSP12 and PpSP14 were also shown immunoreactive in unexposed control  
613 donors and that the circulating antibodies against these specific salivary proteins could be the result  
614 of exposure to other hematophagous arthropod species [70].

615         Specific antibody response also factors into the polarization of the immune response to a  
616 Th1-mediated or Th2-mediated response. The polarization to Th1 or Th2 responses result in  
617 protection against CL or a disease exacerbation effect, respectively [15,62]. In one study, total *P.*  
618 *papatasi* salivary gland homogenate elicited IgG4 specificity as the dominant isotype and subclass  
619 circulating in human donors and positively correlated with IgE concentrations [70]. IgG4 and IgE  
620 are hallmarks of a Th2 and allergic hypersensitivity response [71]. Another study demonstrated  
621 that whole salivary gland homogenate upregulates interleukin 4 (IL-4) while inhibiting interleukin  
622 12 (IL-12) and IFN- $\gamma$  skewing to a Th2 response in the murine model [72]. Th1/Th2 polarization  
623 is also dependent on no exposure or pre-exposure to sand fly bites (as reviewed in [73]). The  
624 antibody response to individual salivary protein antigens was characterized [19]. PpSP12 was  
625 recognized predominately by IgG1 and IgG2 and not IgG4 nor IgE indicating its potential to  
626 polarize to a protective Th1 response. PpSP14 was not characterized as it did not demonstrate  
627 antibody specificity, but in another study produced a humoral response [8,19].

628           Taken together, our results and those of others demonstrate the potential of PpSP12 and  
629 PpSp14 as vaccine targets. Further testing needs to be conducted to more specifically determine  
630 the Th1/Th2 response of PpSP12 and PpSP14 as well as determine if these proteins would confer  
631 protection in individuals living in endemic regions as well as naïve populations who may work or  
632 travel to endemic areas. This work, taken together with other studies, indicates that a combinatorial  
633 vaccine comprised of specific salivary proteins and a *Leishmania* parasite antigen would confer a  
634 more robust immune response resulting in lasting immunity.

### 635 **Funding Statement**

636           This project was supported by contract # W911NF0410380 from the Department of  
637 Defense (DoD) Defense Advanced Research Projects Agency (DARPA) awarded to MAM.  
638 CMF was supported by the University of Notre Dame Eck Institute for Global Health Graduate  
639 Student Fellowship, Arthur J. Schmitt Leadership Fellowship in Science and Engineering, and  
640 William and Linda Stavropoulos Fellowship in Science.

### 641 **Competing Interests**

642           The authors declare they have no competing interests.

### 643 **Acknowledgments**

644           We are grateful to the Egyptian Ministry of Health for their aid and in sand fly collections  
645 and the Multi National Force and Observers (MFO) military units for transportation in the Sinai  
646 Peninsula. Special gratitude goes to Ms. Maria Badra from U.S. Naval Medical Research Unit  
647 Number Three (NAMRU- 3), Cairo, Egypt, for her organizational skills and support of the work  
648 in Egypt. The study protocol was approved by the U.S. Naval Medical Research Unit Number  
649 Three (NAMRU-3) Institutional Review Board IRB No. 193, DoD No, NAMRU3.2006.0011, in  
650 compliance with all applicable Federal regulations governing the protection of human subjects.

651 The content is solely the responsibility of the authors and does not necessarily represent the  
652 official views of the National Institute of Allergy and Infectious Diseases or the National  
653 Institutes of Health of the U.S. Department of Defense. DFH is a retired military service  
654 member; MRO, IVCA, HAH, SSEH, EEDYF and SK are employees of the U.S. Government.  
655 This work was prepared as part of our official duties. Title 17 U.S.C. §105 provides that  
656 'Copyright protection under this title is not available for any work of the United States  
657 Government'. Title 17 U.S.C. §101 defines a U.S. Government work as a work prepared by a  
658 military service member or employee of the U.S. Government as part of that person's official  
659 duties. The opinions and assertions expressed herein are those of the author(s) and do not  
660 necessarily reflect the official policy or position of the Uniformed Services University or the  
661 Department of Defense. This work was prepared by a military or civilian employee of the U.S.  
662 Government as part of the individual's official duties and therefore is in the public domain and  
663 does not possess copyright protection. The authors thank Mariha Wadsworth, Jonathon  
664 Weyerbacher, and Theresa Lai for their help in the sequencing of the sand fly samples.

- 665 1. Alvar J, Vélez ID, Bern C, Herrero M, Desjeux P, Cano J, et al. Leishmaniasis worldwide  
666 and global estimates of its incidence. PLoS One. 2012;7.  
667 doi:10.1371/journal.pone.0035671
- 668 2. World Health Organization. Control of the leishmaniasis. World Heal Organ Tech Rep  
669 Ser. Geneva; 2010;949: 1–186. doi:10.1038/nrmicro1766
- 670 3. Ribeiro JM. Role of saliva in blood feeding by arthropods. Ann Rev Entomol. 1987;32:  
671 463–478. doi:10.1146/annurev.en.32.010187.002335
- 672 4. Marzouki S, Abdeladhim M, Abdessalem C Ben, Oliveira F, Ferjani B, Gilmore D, et al.  
673 Salivary antigen SP32 is the immunodominant target of the antibody response to

- 674 *Phlebotomus papatasi* bites in humans. PLoS Negl Trop Dis. 2012;6.  
675 doi:10.1371/journal.pntd.0001911
- 676 5. Sima M, Novotny M, Pravda L, Sumova P, Rohousova I, Volf P. The diversity of yellow-  
677 related proteins in sand flies (Diptera: Psychodidae). Traub-Csekö YM, editor. PLoS One.  
678 2016;11: e0166191. doi:10.1371/journal.pone.0166191
- 679 6. Marzouki S, Kammoun-Rebai W, Bettaieb J, Abdeladhim M, Hadj Kacem S, Abdelkader  
680 R, et al. Validation of recombinant salivary protein PpSP32 as a suitable marker of human  
681 exposure to *Phlebotomus papatasi*, the vector of *Leishmania major* in Tunisia. PLoS Negl  
682 Trop Dis. 2015;9: 1–14. doi:10.1371/journal.pntd.0003991
- 683 7. Valenzuela JG, Garfield M, Rowton ED, Pham VM. Identification of the most abundant  
684 secreted proteins from the salivary glands of the sand fly *Lutzomyia longipalpis*, vector of  
685 *Leishmania chagasi*. J Exp Biol. 2004;207: 3717–3729. doi:10.1242/jeb.01185
- 686 8. Oliveira F, Lawyer PG, Kamhawi S, Valenzuela JG. Immunity to distinct sand fly salivary  
687 proteins primes the anti-leishmania immune response towards protection or exacerbation  
688 of disease. PLoS Negl Trop Dis. 2008;2. doi:10.1371/journal.pntd.0000226
- 689 9. Oliveira F, Jochim RC, Valenzuela JG, Kamhawi S. Sand flies, *Leishmania*, and  
690 transcriptome-borne solutions. Parasitol Int. Elsevier B.V.; 2009;58: 1–5.  
691 doi:10.1016/j.parint.2008.07.004
- 692 10. Oliveira F, Rowton E, Aslan H, Gomes R, Castrovinci PA, Alvarenga PH, et al. A sand  
693 fly salivary protein vaccine shows efficacy against vector-transmitted cutaneous  
694 leishmaniasis in nonhuman primates. Sci Transl Med. 2015;7: 290ra90.  
695 doi:10.1126/scitranslmed.aaa3043
- 696 11. Tlili A, Marzouki S, Chabaane E, Abdeladhim M, Kammoun-Rebai W, Sakkouhi R, et al.

- 697 *Phlebotomus papatasi* yellow-related and apyrase salivary proteins are candidates for  
698 vaccination against human cutaneous leishmaniasis. J Invest Dermatol. Elsevier;  
699 2017;138: 598–606. doi:10.1016/J.JID.2017.09.043
- 700 12. Kamhawi S, Belkaid Y, Modi G, Rowton E, Sacks D. Protection against cutaneous  
701 leishmaniasis resulting from bites of uninfected sand flies. Science. 2000;290: 1351–1354.  
702 doi:10.1126/science.290.5495.1351
- 703 13. Abdeladhim M, Jochim RC, Ben Ahmed M, Zhioua E, Chelbi I, Cherni S, et al. Updating  
704 the salivary gland transcriptome of *Phlebotomus papatasi* (Tunisian strain): The search for  
705 sand fly-secreted immunogenic proteins for humans. PLoS One. 2012;7: e47347.  
706 doi:10.1371/journal.pone.0047347
- 707 14. Titus R, Ribeiro J. Salivary gland lysates from the sand fly *Lutzomyia longipalpis* enhance  
708 *Leishmania* infectivity. Science (80- ). 1988;239: 1306–1308.  
709 doi:10.1126/science.3344436
- 710 15. Belkaid Y, Kamhawi S, Modi G, Valenzuela J, Noben-Trauth N, Rowton E, et al.  
711 Development of a natural model of cutaneous leishmaniasis: Powerful effects of vector  
712 saliva and saliva preexposure on the long-term outcome of *Leishmania major* infection in  
713 the mouse ear dermis. J Exp Med. 1998;188: 1941–1953. doi:10.1084/jem.188.10.1941
- 714 16. Rohousova I, Ozensoy S, Ozbel Y, Volf P. Detection of species-specific antibody  
715 response of humans and mice bitten by sand flies. Parasitology. 2005;130: 493–499.  
716 doi:10.1017/S003118200400681X
- 717 17. Lestinova T, Vlkova M, Votypka J, Volf P, Rohousova I. *Phlebotomus papatasi* exposure  
718 cross-protects mice against *Leishmania major* co-inoculated with *Phlebotomus duboscqi*  
719 salivary gland homogenate. Acta Trop. 2015;144: 9–18.

- 720 doi:10.1016/j.actatropica.2015.01.005
- 721 18. Tavares NM, Silva RA, Costa DJ, Pitombo MA, Fukutani KF, Miranda JC, et al.  
722 *Lutzomyia longipalpis* saliva or salivary protein LJM19 protects against *Leishmania*  
723 *braziliensis* and the saliva of its vector, *Lutzomyia intermedia*. PLoS Negl Trop Dis.  
724 2011;5. doi:10.1371/journal.pntd.0001169
- 725 19. Marzouki S, Ben Ahmed M, Boussoffara T, Abdeladhim M, Ben Aleya-Bouafif N,  
726 Namane A, et al. Characterization of the antibody response to the saliva of *Phlebotomus*  
727 *papatasi* in people living in endemic areas of cutaneous leishmaniasis. Am J Trop Med  
728 Hyg. 2011;84: 653–661. doi:10.4269/ajtmh.2011.10-0598
- 729 20. de Moura TR, Oliveira F, Novais FO, Miranda JC, Clarêncio J, Follador I, et al. Enhanced  
730 *Leishmania braziliensis* infection following pre-exposure to sandfly saliva. PLoS Negl  
731 Trop Dis. 2007;1. doi:10.1371/journal.pntd.0000084
- 732 21. Andrade BB, Teixeira CR. Biomarkers for exposure to sand flies bites as tools to aid  
733 control of leishmaniasis. Front Immunol. 2012;3: 1–7. doi:10.3389/fimmu.2012.00121
- 734 22. Mondragon-Shem K, Al-Salem WS, Kelly-Hope L, Abdeladhim M, Al-Zahrani MH,  
735 Valenzuela JG, et al. Severity of Old World cutaneous leishmaniasis is influenced by  
736 previous exposure to sandfly bites in Saudi Arabia. PLoS Negl Trop Dis. 2015;9:  
737 e0003449. doi:10.1371/journal.pntd.0003449
- 738 23. Elnaiem D-EA, Meneses C, Slotman M, Lanzaro GC. Genetic variation in the sand fly  
739 salivary protein, SP-15, a potential vaccine candidate against *Leishmania major*. Insect  
740 Mol Biol. 2005;14: 145–150. doi:10.1111/j.1365-2583.2004.00539.x
- 741 24. Ramalho-Ortigão M, Coutinho-Abreu I V., Balbino VQ, Figueiredo CAS, Mukbel R,  
742 Dayem H, et al. *Phlebotomus papatasi* SP15: mRNA expression variability and amino



- 743 acid sequence polymorphisms of field populations. *Parasit Vectors*. 2015;8: 298.  
744 doi:10.1186/s13071-015-0914-2
- 745 25. Coutinho-Abreu I V., Ramalho-Ortigao M. Ecological genomics of sand fly salivary gland  
746 genes: An overview. *J Vector Ecol*. 2011;36: 58–63. doi:10.1111/j.1948-  
747 7134.2011.00112.x
- 748 26. Hamarsheh O, Presber W, Abdeen Z, Sawalha S, Al-Lahem A, Schönian G. Genetic  
749 structure of Mediterranean populations of the sandfly *Phlebotomus papatasi* by  
750 mitochondrial cytochrome b haplotype analysis. *Med Vet Entomol*. 2007;21: 270–277.  
751 doi:10.1111/j.1365-2915.2007.00695.x
- 752 27. Hamarsheh O, Presber W, Yaghoobi-Ershadi MR, Amro A, Al-Jawabreh A, Sawalha S, et  
753 al. Population structure and geographical subdivision of the *Leishmania major* vector  
754 *Phlebotomus papatasi* as revealed by microsatellite variation. *Med Vet Entomol*. 2009;23:  
755 69–77. doi:10.1111/j.1365-2915.2008.00784.x
- 756 28. Depaquit J, Lienard E, Verzeaux-Griffon A, Ferté H, Bounamous A, Gantier JC, et al.  
757 Molecular homogeneity in diverse geographical populations of *Phlebotomus papatasi*  
758 (Diptera, Psychodidae) inferred from ND4 mtDNA and ITS2 rDNA. Epidemiological  
759 consequences. *Infect Genet Evol*. 2008;8: 159–170. doi:10.1016/j.meegid.2007.12.001
- 760 29. Esseghir S, Ready PD, Killick-Kendrick R, Ben-Ismaïl R. Mitochondrial haplotypes and  
761 phylogeography of *Phlebotomus* vectors of *Leishmania major*. *Insect Mol Biol*. 1997;6:  
762 211–225. doi:DOI 10.1046/j.1365-2583.1997.00175.x
- 763 30. Raja B, Jaouadi K, Haouas N, Mezhoud H, Bdira S, Amor S. Mitochondrial cytochrome b  
764 variation in populations of the cutaneous leishmaniasis vector *Phlebotomus papatasi*  
765 across eastern Tunisia. *Int J Biodivers Conserv*. 2012;4: 189–196.

- 766 doi:10.5897/IJBC11.191
- 767 31. Flanley CM, Ramalho-Ortigao M, Coutinho-Abreu I V, Mukbel R, Hanafi HA, El-  
768 Hossary SS, et al. Population genetics analysis of *Phlebotomus papatasi* sand flies from  
769 Egypt and Jordan based on mitochondrial cytochrome b haplotypes. Parasit Vectors.  
770 2018;11: 1–11. doi:10.1186/s13071-018-2785-9
- 771 32. Bessat M, Shanat S El. Leishmaniasis: Epidemiology, control and future perspectives with  
772 special emphasis on Egypt. J Trop Dis. 2015;2: 1–10. doi:10.4172/2329891X.1000153
- 773 33. Salam N, Al-Shaqha WM, Azzi A. Leishmaniasis in the Middle East: Incidence and  
774 epidemiology. PLoS Negl Trop Dis. 2014;8: 1–8. doi:10.1371/journal.pntd.0003208
- 775 34. Lane RP. The sandflies of Egypt (Diptera: Phlebotominae). Bull Br Museum (Natural  
776 Hist. London: The Museum; 1986;52: 1–35.
- 777 35. Añez N, Tang Y. Comparison of three methods for age-grading of female Neotropical  
778 phlebotomine sandflies. Med Vet Entomol. 1997;11: 3–7. doi:10.1111/j.1365-  
779 2915.1997.tb00283.x
- 780 36. STyx. World Location Map. In: Wikimedia Commons [Internet]. 2010. Available:  
781 [https://commons.wikimedia.org/wiki/File:World\\_location\\_map.svg](https://commons.wikimedia.org/wiki/File:World_location_map.svg)
- 782 37. Hoel DF, Butler JF, Fawaz EY, Watany N, El-Hossary SS, Villinski J. Response of  
783 phlebotomine sand flies to light-emitting diode-modified light traps in southern Egypt. J  
784 Vector Ecol. 2007;32: 302–8. doi:10.3376/1081-1710(2007)32[302:ROPSFT]2.0.CO;2
- 785 38. Saliba EK, Oumeish OY. Reservoir hosts of cutaneous leishmaniasis. Clin Dermatol.  
786 1999;17: 275–277. doi:10.1016/S0738-081X(99)00045-0
- 787 39. Schlein Y, Jacobson RL. Linkage between susceptibility of *Phlebotomus papatasi* to  
788 *Leishmania major* and hunger tolerance. Parasitology. 2002;125: 343–8.

- 789           doi:10.1017/S0031182002002147
- 790   40.   Kamhawi S, Modi GB, Pimenta PF, Rowton E, Sacks DL. The vectorial competence of  
791       *Phlebotomus sergenti* is specific for *Leishmania tropica* and is controlled by species-  
792       specific, lipophosphoglycan-mediated midgut attachment. *Parasitology*. 2000;121: 25–33.  
793       doi:10.1017/S0031182099006125
- 794   41.   Coutinho-Abreu I V, Mukbel R, Hanafi HA, Fawaz EY, El-Hossary SS, Wadsworth M, et  
795       al. Expression plasticity of *Phlebotomus papatasi* salivary gland genes in distinct ecotopes  
796       through the sand fly season. *BMC Ecol. BioMed Central Ltd*; 2011;11: 24.  
797       doi:10.1186/1472-6785-11-24
- 798   42.   Kumar S, Stecher G, Tamura K. MEGA7: Molecular evolutionary genetics analysis  
799       version 7.0 for bigger datasets. *Mol Biol Evol*. 2016;33: 1870–1874.  
800       doi:10.1093/molbev/msw054
- 801   43.   Miles A, Iqbal Z, Vauterin P, Pearson R, Campino S, Theron M, et al. Indels, structural  
802       variation, and recombination drive genomic diversity in *Plasmodium falciparum*. *Genome*  
803       *Res*. 2016;26: 1288–1299. doi:10.1101/gr.203711.115
- 804   44.   Andrews S. FastQC: a quality control tool for high throughput sequence data. [Internet].  
805       2010. Available: <https://www.bioinformatics.babraham.ac.uk/projects/fastqc/>
- 806   45.   Li H, Durbin R. Fast and accurate long-read alignment with Burrows-Wheeler transform.  
807       *Bioinformatics*. 2010;26: 589–595. doi:10.1093/bioinformatics/btp698
- 808   46.   Lander ES, Waterman MS. Genomic mapping by fingerprinting random clones: A  
809       mathematical analysis. *Genomics*. 1988;2: 231–239. doi:10.1016/0888-7543(88)90007-9
- 810   47.   Rozas J, Ferrer-Mata A, Sanchez-DelBarrio JC, Guirao-Rico S, Librado P, Ramos-Onsins  
811       SE, et al. DnaSP 6: DNA sequence polymorphism analysis of large data sets. *Mol Biol*

- 812 Evol. Oxford University Press; 2017;34: 3299–3302. doi:10.1093/molbev/msx248
- 813 48. Hudson RR, Slatkin M, Maddison WP. Estimation of levels of gene flow from DNA  
814 sequence data. *Genetics*. 1992;132: 583–589. doi:PMC1205159
- 815 49. Wright S. *Evolution and the genetics of populations, variability within and among natural*  
816 *populations*. The University of Chicago Press, Chicago. 1978.
- 817 50. Nei M. Analysis of gene diversity in subdivided populations. *Proc Natl Acad Sci U S A*.  
818 1973;70: 3321–3323. doi:10.1073/pnas.70.12.3321
- 819 51. Hudson RR, Boos DD, Kaplan NL. A statistical test for detecting geographic subdivision.  
820 *Mol Biol Evol*. 1992;9: 138–151.
- 821 52. Kimura M. Evolutionary rate at the molecular level. *Nature*. 1968;217: 624–626.  
822 doi:10.1038/217624a0
- 823 53. Tajima F. Statistical method for testing the neutral mutation hypothesis by DNA  
824 polymorphism. *Genetics*. 1989;123: 585–595. doi:PMC1203831
- 825 54. Fu YX, Li WH. Statistical tests of neutrality of mutations. *Genetics*. 1993;133: 693–709.
- 826 55. Crooks G, Hon G, Chandonia J, Brenner S. WebLogo: a sequence logo generator.  
827 *Genome Res*. 2004;14: 1188–1190. doi:10.1101/gr.849004.1
- 828 56. Bandelt HJ, Forster P, Röhl A. Median-joining networks for inferring intraspecific  
829 phylogenies. *Mol Biol Evol*. 1999;16: 37–48. doi:10.1093/oxfordjournals.molbev.a026036
- 830 57. Wang P, Sidney J, Dow C, Mothé B, Sette A, Peters B. A systematic assessment of MHC  
831 class II peptide binding predictions and evaluation of a consensus approach. *PLoS*  
832 *Comput Biol*. 2008;4. doi:10.1371/journal.pcbi.1000048
- 833 58. Wang P, Sidney J, Kim Y, Sette A, Lund O, Nielsen M, et al. Peptide binding predictions  
834 for HLA DR, DP and DQ molecules. *BMC Bioinformatics*. 2010;11: 568–580.

- 835           doi:10.1186/1471-2105-11-568
- 836   59.   Singh H, Raghava GPS. ProPred: Prediction of HLA-DR binding sites. *Bioinformatics*.  
837           2001;17: 1236–1237. doi:10.1093/bioinformatics/17.12.1236
- 838   60.   Betts MJ, Russell RB. Amino acid properties and consequences of substitutions. In:  
839           Barnes MR, Gray IC, editors. *Bioinformatics for Geneticists*. West Sussex: John Wiley &  
840           Sons Ltd.; 2003. pp. 289–304. doi:10.1002/0470867302.ch14
- 841   61.   Srivastava S, Shankar P, Mishra J, Singh S. Possibilities and challenges for developing a  
842           successful vaccine for leishmaniasis. *Parasites and Vectors*. 2016;9: 1–15.  
843           doi:10.1186/s13071-016-1553-y
- 844   62.   Valenzuela JG, Belkaid Y, Garfield MK, Mendez S, Kamhawi S, Rowton ED, et al.  
845           Toward a defined anti-*Leishmania* vaccine targeting vector antigens: Characterization of a  
846           protective salivary protein. *J Exp Med*. 2001;194: 331–342. doi:10.1084/jem.194.3.331
- 847   63.   Kato H, Anderson JM, Kamhawi S, Oliveira F, Lawyer PG, Pham VM, et al. High degree  
848           of conservancy among secreted salivary gland proteins from two geographically distant  
849           *Phlebotomus duboscqi* sandflies populations (Mali and Kenya). *BMC Genomics*. 2006;7:  
850           1–21. doi:10.1186/1471-2164-7-226
- 851   64.   Thiakaki M, Rohousova I, Volfova V, Volf P, Chang KP, Soteriadou K. Sand fly  
852           specificity of saliva-mediated protective immunity in *Leishmania amazonensis*-BALB/c  
853           mouse model. *Microbes Infect*. 2005;7: 760–766. doi:10.1016/j.micinf.2005.01.013
- 854   65.   Henrickson SE, Mempel TR, Mazo IB, Liu B, Artyomov MN, Zheng H, et al. T cell  
855           sensing of antigen dose governs interactive behavior with dendritic cells and sets a  
856           threshold for T cell activation. *Nat Immunol*. 2008;9: 282–291. doi:10.1038/ni1559
- 857   66.   Coutinho-Abreu I V, Wadsworth M, Stayback G, Ramalho-Ortigao M, McDowell MA.

- 858 Differential expression of salivary gland genes in the female sand fly *Phlebotomus*  
859 *papatasi* (Diptera: Psychodidae). J Med Entomol. 2010;47: 1146–1155.  
860 doi:10.1603/ME10072
- 861 67. Hajjej A, Almawi WY, Arnaiz-Villena A, Hattab L, Hmida S. The genetic heterogeneity  
862 of Arab populations as inferred from HLA genes. PLoS One. 2018;13: 1–24.  
863 doi:10.1371/journal.pone.0192269
- 864 68. González-Galarza FF, Takeshita LYC, Santos EJM, Kempson F, Maia MHT, da Silva  
865 ALS, et al. Allele frequency net 2015 update: New features for HLA epitopes, KIR and  
866 disease and HLA adverse drug reaction associations. Nucleic Acids Res. 2015;43: D784–  
867 D788. doi:10.1093/nar/gku1166
- 868 69. Elbjeirami WM, Abdel-Rahman F, Hussein AA. Probability of finding an HLA-matched  
869 donor in immediate and extended families: The Jordanian experience. Biol Blood Marrow  
870 Transplant. 2013;19: 221–226. doi:10.1016/j.bbmt.2012.09.009
- 871 70. Geraci NS, Mukbel RM, Kemp MT, Wadsworth MN, Lesho E, Stayback GM, et al.  
872 Profiling of human acquired immunity against the salivary proteins of *Phlebotomus*  
873 *papatasi* reveals clusters of differential immunoreactivity. Am J Trop Med Hyg. 2014;90:  
874 923–938. doi:10.4269/ajtmh.13-0130
- 875 71. Punnonen J, Aversa G, Cocks BG, McKenzie AN, Menon S, Zurawski G, et al.  
876 Interleukin 13 induces interleukin 4-independent IgG4 and IgE synthesis and CD23  
877 expression by human B cells. Proc Natl Acad Sci. 1993;90: 3730–3734.  
878 doi:10.1073/pnas.90.8.3730
- 879 72. Mbow ML, Bleyenbergh JA, Hall LR, Titus RG. *Phlebotomus papatasi* sand fly salivary  
880 gland lysate down-regulates a Th1, but up-regulates a Th2, response in mice infected with

881 *Leishmania major*. J Immunol. 1998;161: 5571–7.

882 73. Lestinova T, Rohousova I, Sima M, de Oliveira CI, Volf P. Insights into the sand fly  
883 saliva: Blood-feeding and immune interactions between sand flies, hosts, and *Leishmania*.  
884 PLoS Negl Trop Dis. 2017;11: 1–26. doi:10.1371/journal.pntd.0005600

885

886

887 **S1 Table. *Phlebotomus papatasi* salivary protein primers and GenBank accession numbers.**

888 \*\*\*=Amplicon is under 200 base pairs; not assigned an accession number; sequences available  
889 upon request.

890

891 **S2 Table. *Phlebotomus papatasi* salivary protein gene multi-copy assessment.**

892

893 **S3 Fig. PpSP29 nucleotide and amino acid variation.**

894 (A) Weblogo illustrating the relative frequencies of nucleotide polymorphisms in wild caught *P.*  
895 *papatasi* populations from PPAW, PPJM, and PPJS. (B) Weblogo illustrating the relative  
896 frequencies of amino acid polymorphisms in wild caught *P. papatasi* populations from PPAW,  
897 PPJM, and PPJS.

898

899 **S4 Table. PpSP29 population genetics analyses for *P. papatasi* populations**

900 NS= $p > 0.10$ ; NS<sup>1</sup>= $0.10 > p > 0.05$ ; \*= $p < 0.05$

901

902 **S5 Table. PpSP29 pairwise comparisons of genetic differentiation estimates.**

903

904 **S6 Fig. Median-joining network for PpSP29 *P. papatasi* haplotypes.**

905 Circle size and circle color indicates frequency and geographical location of haplotypes,  
906 respectively. Haplotype numbers are written next to the corresponding circle H\_XX. Red  
907 numbers between haplotypes indicate number of mutations between haplotypes.

908

909 **S7 Table. PpSP29 sliding window analysis.**

910 Ka/Ks were plotted for every 70 codons. Values greater than one suggest the potential for  
911 positive selection. ---- indicates a lack of polymorphic data in the window to calculate a Ka/Ks  
912 value.

913

914 **S8 Fig. PpSp29 secondary structure, polymorphic sites, and MHC class II epitope  
915 predictions.**

916 The mature PpSP29 amino acid sequence predicted secondary structure. Yellow highlighted  
917 amino acids indicate the predicted MHC class II predicted promiscuous peptides. Individual  
918 amino acids underlined in black indicate unique polymorphic sites. Predicted secondary structure  
919 based on sequence accession #AGE83096[13].

920

921 **S9 Fig. PpSP30 nucleotide and amino acid variation.**

922 (A) Weblogo illustrating the relative frequencies of nucleotide polymorphisms in wild caught *P.*  
923 *papatasi* populations from PPAW, PPJM, and PPJS. (B) Weblogo illustrating the relative  
924 frequencies of amino acid polymorphisms in wild caught *P. papatasi* populations from PPAW,  
925 PPJM, and PPJS.

926



927 **S10 Table. PpSP30 population genetics analyses for *P. papatasi* populations**

928 NS= $p > 0.10$ ; NS<sup>1</sup>= $0.10 > p > 0.05$ ; \*= $p < 0.05$

929

930 **S11 Table. PpSP30 pairwise comparisons of genetic differentiation estimates.**

931

932 **S12 Fig. Median-joining network for PpSP30 *P. papatasi* haplotypes.**

933 Circle size and circle color indicates frequency and geographical location of haplotypes,

934 respectively. Haplotype numbers are written next to the corresponding circle H\_XX. Red

935 numbers between haplotypes indicate number of mutations between haplotypes.

936

937 **S13 Table. PpSP30 sliding window analysis.**

938 Ka/Ks were plotted for every 70 codons. Values greater than one suggest the potential for

939 positive selection. ---- indicates a lack of polymorphic data in the window to calculate a Ka/Ks

940 value.

941

942 **S14 Fig. PpSp30 secondary structure, polymorphic sites, and MHC class II epitope**  
943 **predictions.**

944 The mature PpSP30 amino acid sequence predicted secondary structure. Yellow highlighted

945 amino acids indicate the predicted MHC class II predicted promiscuous peptides. Individual

946 amino acids underlined in black indicate unique polymorphic sites. Predicted secondary structure

947 based on sequence accession #AGE83093[13].

948

949 **S15 Fig. PpSP32 nucleotide and amino acid variation.**

950 (A) Weblogo illustrating the relative frequencies of nucleotide polymorphisms in wild caught *P.*  
951 *papatasi* populations from PPAW, PPJM, and PPJS. (B) Weblogo illustrating the relative  
952 frequencies of amino acid polymorphisms in wild caught *P. papatasi* populations from PPAW,  
953 PPJM, and PPJS.

954

955 **S16 Table. PpSP32 population genetics analyses for *P. papatasi* populations**

956 NS= $p > 0.10$ ; NS<sup>1</sup>= $0.10 > p > 0.05$ ; \*= $p < 0.05$

957

958 **S17 Table. PpSP32 pairwise comparisons of genetic differentiation estimates.**

959

960 **S18 Fig. Median-joining network for PpSP32 *P. papatasi* haplotypes.**

961 Circle size and circle color indicates frequency and geographical location of haplotypes,  
962 respectively. Haplotype numbers are written next to the corresponding circle H\_XX. Red  
963 numbers between haplotypes indicate number of mutations between haplotypes.

964

965 **S19 Table. PpSP32 sliding window analysis.**

966 Ka/Ks were plotted for every 70 codons. Values greater than one suggest the potential for  
967 positive selection. ---- indicates a lack of polymorphic data in the window to calculate a Ka/Ks  
968 value.

969

970 **S20 Fig. PpSp32 secondary structure, polymorphic sites, and MHC class II epitope**  
971 **predictions.**

972 The mature PpSP32 amino acid sequence predicted secondary structure. Yellow highlighted  
973 amino acids indicate the predicted MHC class II predicted promiscuous peptides. Individual  
974 amino acids underlined in black indicate unique polymorphic sites. Predicted secondary structure  
975 based on sequence accession #AGE83097[13].

976

977 **S21 Fig. PpSP36 nucleotide and amino acid variation.**

978 (A) Weblogo illustrating the relative frequencies of nucleotide polymorphisms in wild caught *P.*  
979 *papatasi* populations from PPAW, PPJM, and PPJS. (B) Weblogo illustrating the relative  
980 frequencies of amino acid polymorphisms in wild caught *P. papatasi* populations from PPAW,  
981 PPJM, and PPJS.

982

983 **S22 Table. PpSP36 population genetics analyses for *P. papatasi* populations**

984 NS= $p > 0.10$ ; NS<sup>1</sup>= $0.10 > p > 0.05$ ; \*= $p < 0.05$

985

986 **S23 Table. PpSP36 pairwise comparisons of genetic differentiation estimates.**

987

988 **S24 Fig. Median-joining network for PpSP36 *P. papatasi* haplotypes.**

989 Circle size and circle color indicates frequency and geographical location of haplotypes,  
990 respectively. Haplotype numbers are written next to the corresponding circle H\_XX. Red  
991 numbers between haplotypes indicate number of mutations between haplotypes.

992

993 **S25 Table. PpSP36 sliding window analysis.**

994 Ka/Ks were plotted for every 70 codons. Values greater than one suggest the potential for  
995 positive selection. ---- indicates a lack of polymorphic data in the window to calculate a Ka/Ks  
996 value.

997

998 **S26 Fig. PpSp36 secondary structure, polymorphic sites, and MHC class II epitope**  
999 **predictions.**

1000 The mature PpSP36 amino acid sequence predicted secondary structure. Yellow highlighted  
1001 amino acids indicate the predicted MHC class II predicted promiscuous peptides. Individual  
1002 amino acids underlined in black indicate unique polymorphic sites. Predicted secondary structure  
1003 based on sequence accession #AGE83101[13].

1004

1005 **S27 Fig. PpSP42 nucleotide and amino acid variation.**

1006 (A) Weblogo illustrating the relative frequencies of nucleotide polymorphisms in wild caught *P.*  
1007 *papatasi* populations from PPAW, PPJM, and PPJS. (B) Weblogo illustrating the relative  
1008 frequencies of amino acid polymorphisms in wild caught *P. papatasi* populations from PPAW,  
1009 PPJM, and PPJS.

1010

1011 **S28 Table. PpSP42 population genetics analyses for *P. papatasi* populations**

1012 NS= $p > 0.10$ ; NS<sup>1</sup>= $0.10 > p > 0.05$ ; \*= $p < 0.05$

1013

1014 **S29 Table. PpSP42 pairwise comparisons of genetic differentiation estimates.**

1015

1016 **S30 Fig. Median-joining network for PpSP42 *P. papatasi* haplotypes.**

1017 Circle size and circle color indicates frequency and geographical location of haplotypes,  
1018 respectively. Haplotype numbers are written next to the corresponding circle H\_XX. Red  
1019 numbers between haplotypes indicate number of mutations between haplotypes.

1020

1021 **S31 Table. PpSP42 sliding window analysis.**

1022 Ka/Ks were plotted for every 70 codons. Values greater than one suggest the potential for  
1023 positive selection. ---- indicates a lack of polymorphic data in the window to calculate a Ka/Ks  
1024 value.

1025

1026 **S32 Fig. PpSp42 secondary structure, polymorphic sites, and MHC class II epitope  
1027 predictions.**

1028 The mature PpSP42 amino acid sequence predicted secondary structure. Yellow highlighted  
1029 amino acids indicate the predicted MHC class II predicted promiscuous peptides. Individual  
1030 amino acids underlined in black indicate unique polymorphic sites. Predicted secondary structure  
1031 based on sequence accession #AGE83094[13].

1032

1033 **S33 Fig. PpSP44 nucleotide and amino acid variation.**

1034 (A) Weblogo illustrating the relative frequencies of nucleotide polymorphisms in wild caught *P.*  
1035 *papatasi* populations from PPAW, PPJM, and PPJS. (B) Weblogo illustrating the relative  
1036 frequencies of amino acid polymorphisms in wild caught *P. papatasi* populations from PPAW,  
1037 PPJM, and PPJS.

1038

1039 **S34 Table. PpSP44 population genetics analyses for *P. papatasi* populations**

1040 NS= $p > 0.10$ ; NS<sup>1</sup>= $0.10 > p > 0.05$ ; \*= $p < 0.05$

1041

1042 **S35 Table. PpSP44 pairwise comparisons of genetic differentiation estimates.**

1043

1044 **S36 Fig. Median-joining network for PpSP44 *P. papatasi* haplotypes.**

1045 Circle size and circle color indicates frequency and geographical location of haplotypes,

1046 respectively. Haplotype numbers are written next to the corresponding circle H\_XX. Red

1047 numbers between haplotypes indicate number of mutations between haplotypes.

1048

1049 **S37 Table. PpSP44 sliding window analysis.**

1050 Ka/Ks were plotted for every 70 codons. Values greater than one suggest the potential for

1051 positive selection. ---- indicates a lack of polymorphic data in the window to calculate a Ka/Ks

1052 value.

1053

1054 **S38 Fig. PpSp44 secondary structure, polymorphic sites, and MHC class II epitope**  
1055 **predictions.**

1056 The mature PpSP44 amino acid sequence predicted secondary structure. Yellow highlighted

1057 amino acids indicate the predicted MHC class II predicted promiscuous peptides. Individual

1058 amino acids underlined in black indicate unique polymorphic sites. Predicted secondary structure

1059 based on sequence accession #AGE83095[13].

1060

1061 **S39 Table. Summary Tajima's D and Ka/Ks analysis for all *P. papatasi* salivary proteins**

1062 **studied.**

1063 NS= $p > 0.10$ ; NS<sup>1</sup>= $0.10 > p > 0.05$ ; \*= $p < 0.05$

1064

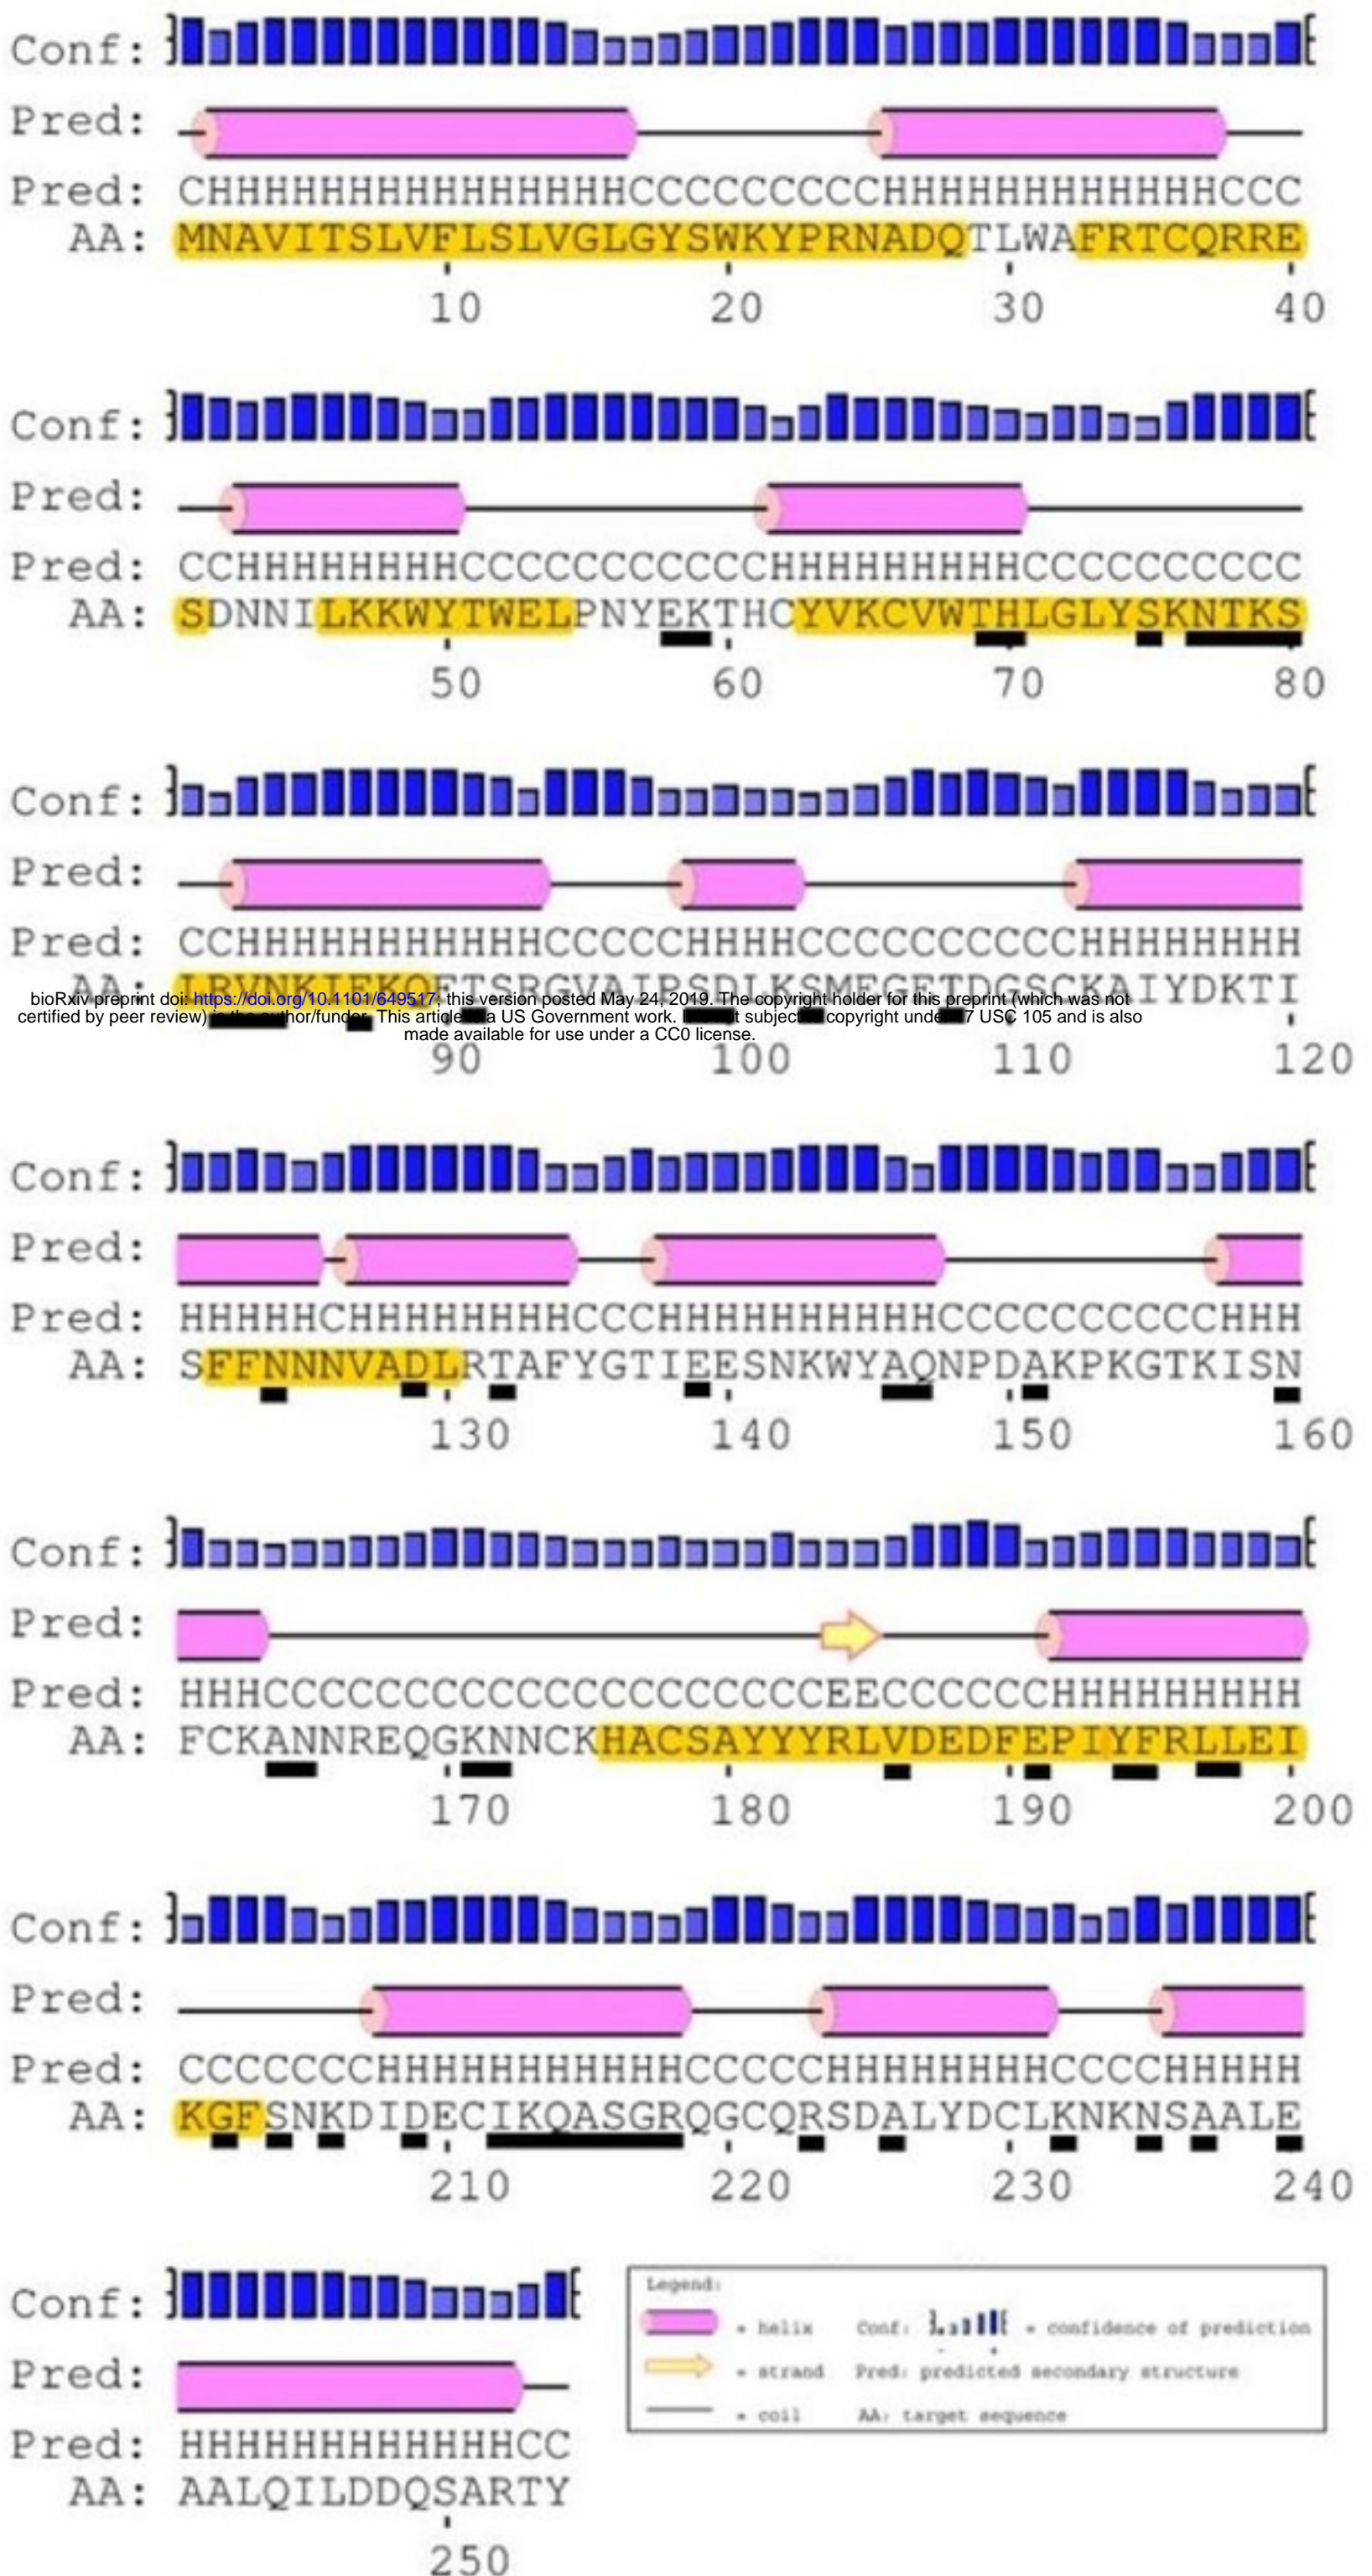

Figure 10



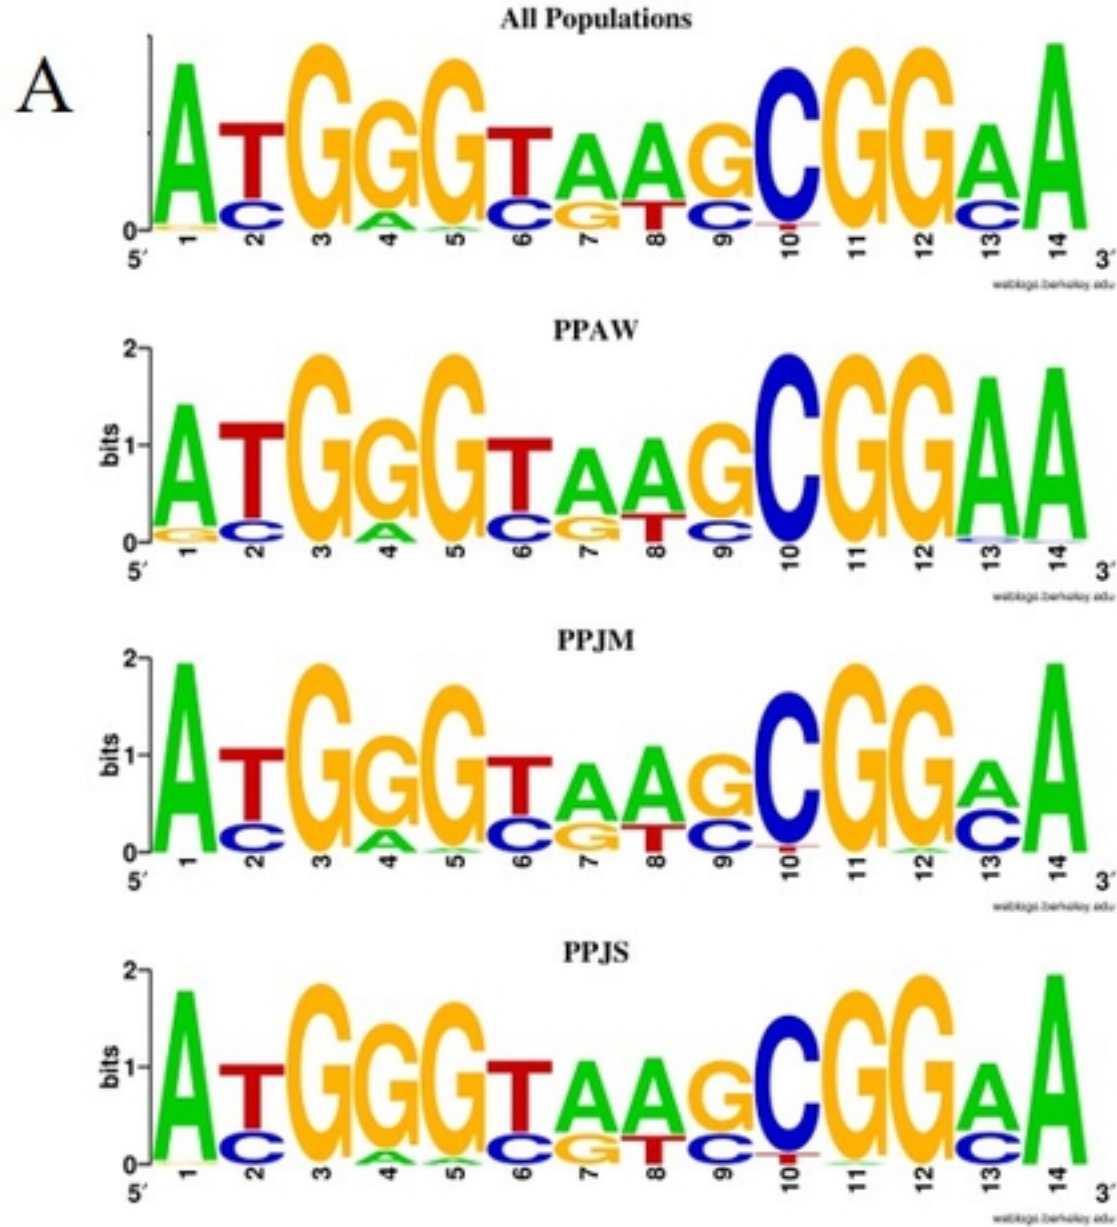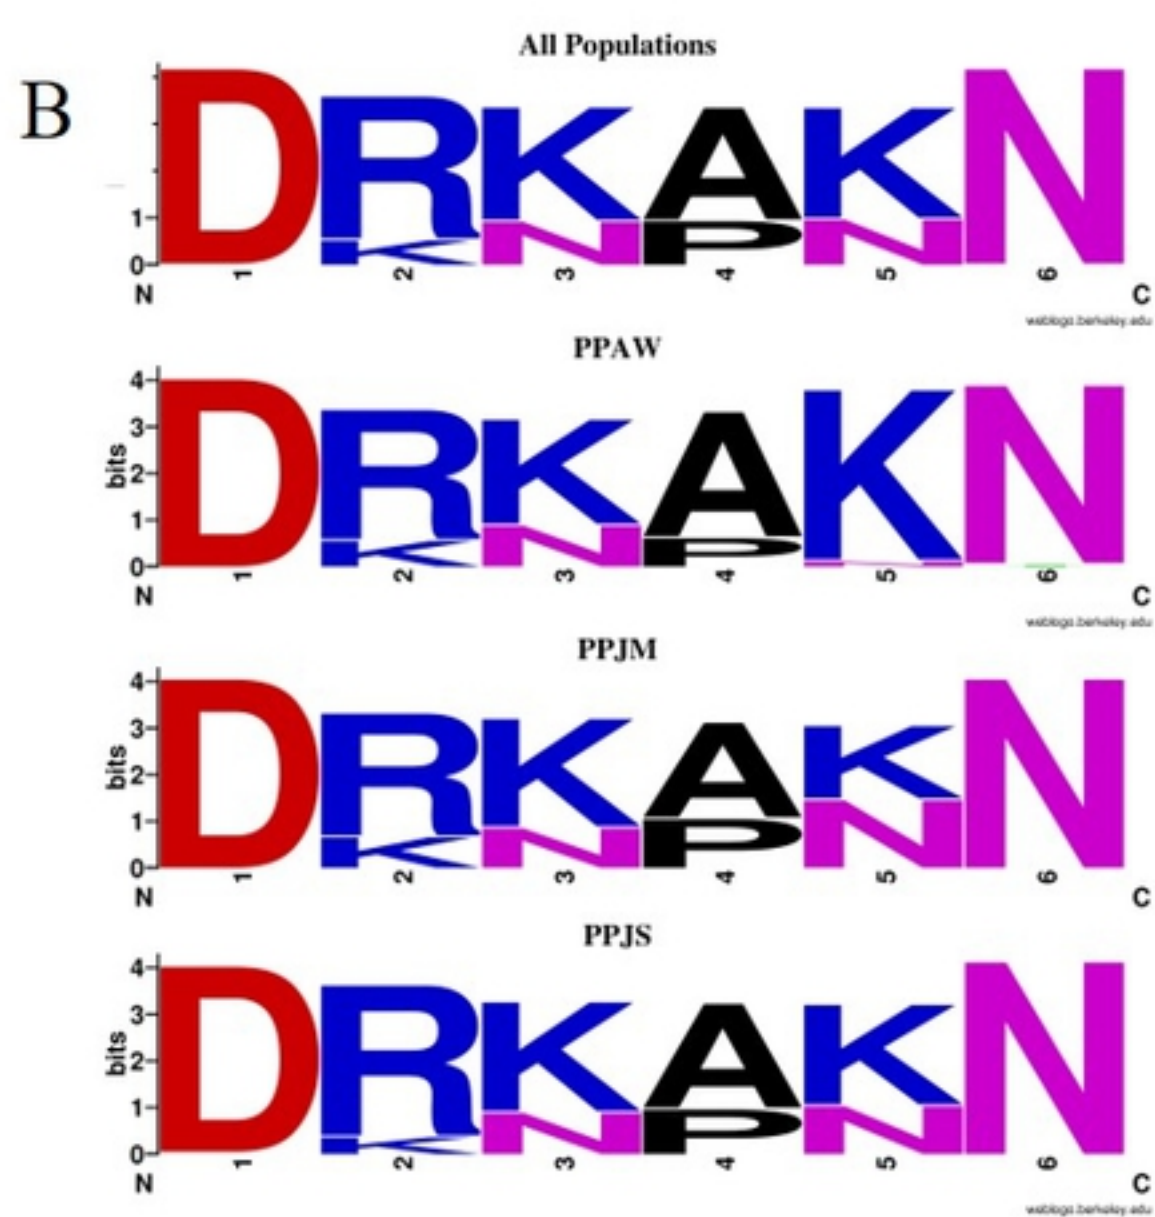

Figure 2

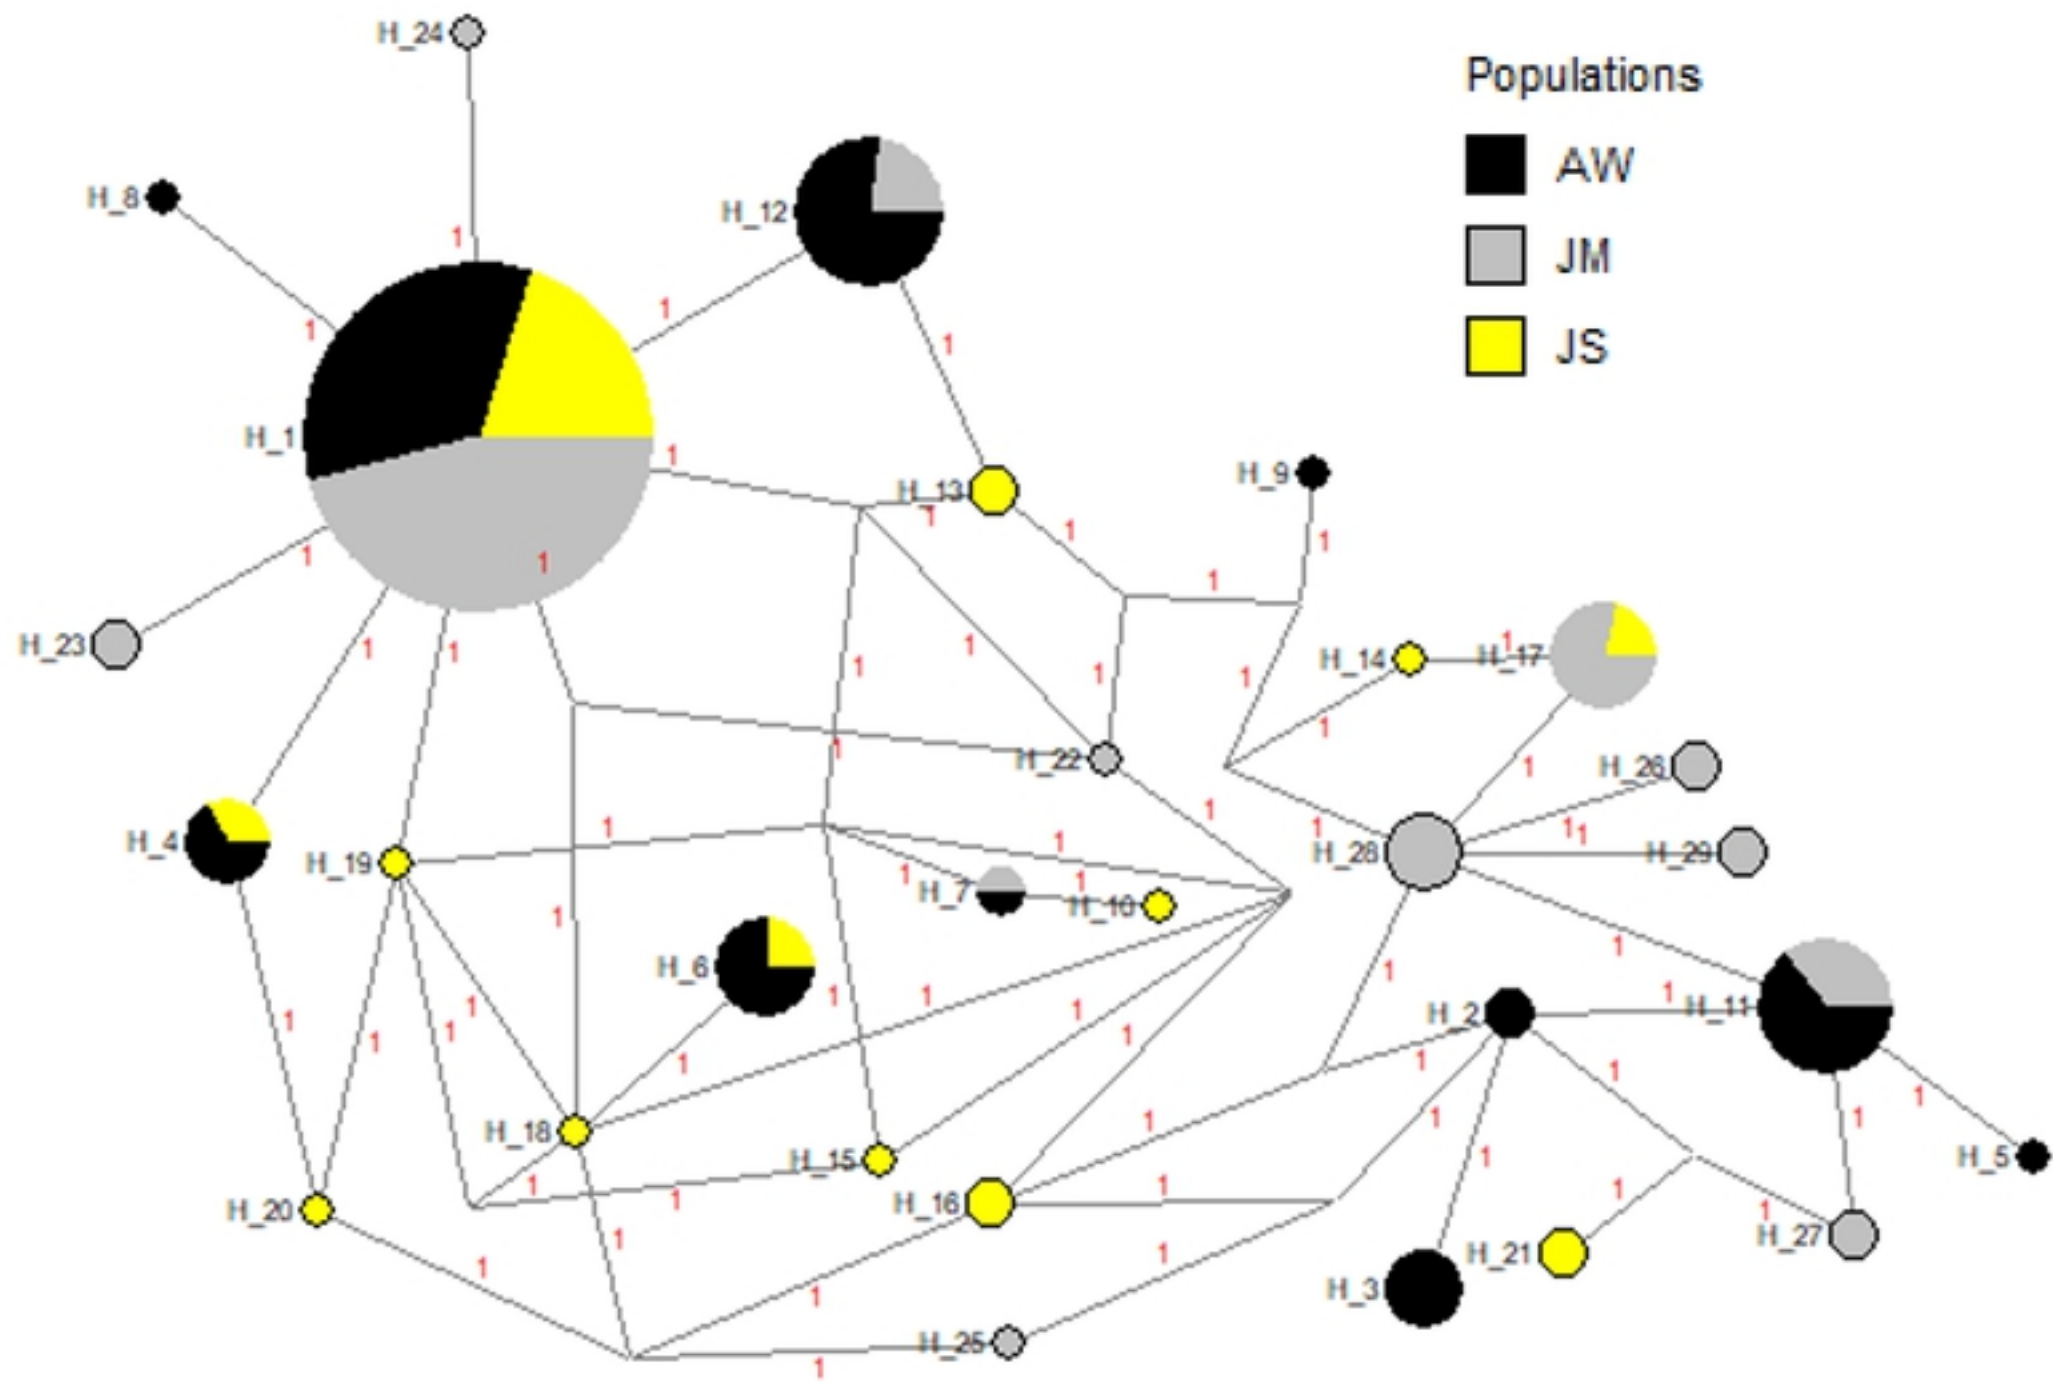

Figure 3

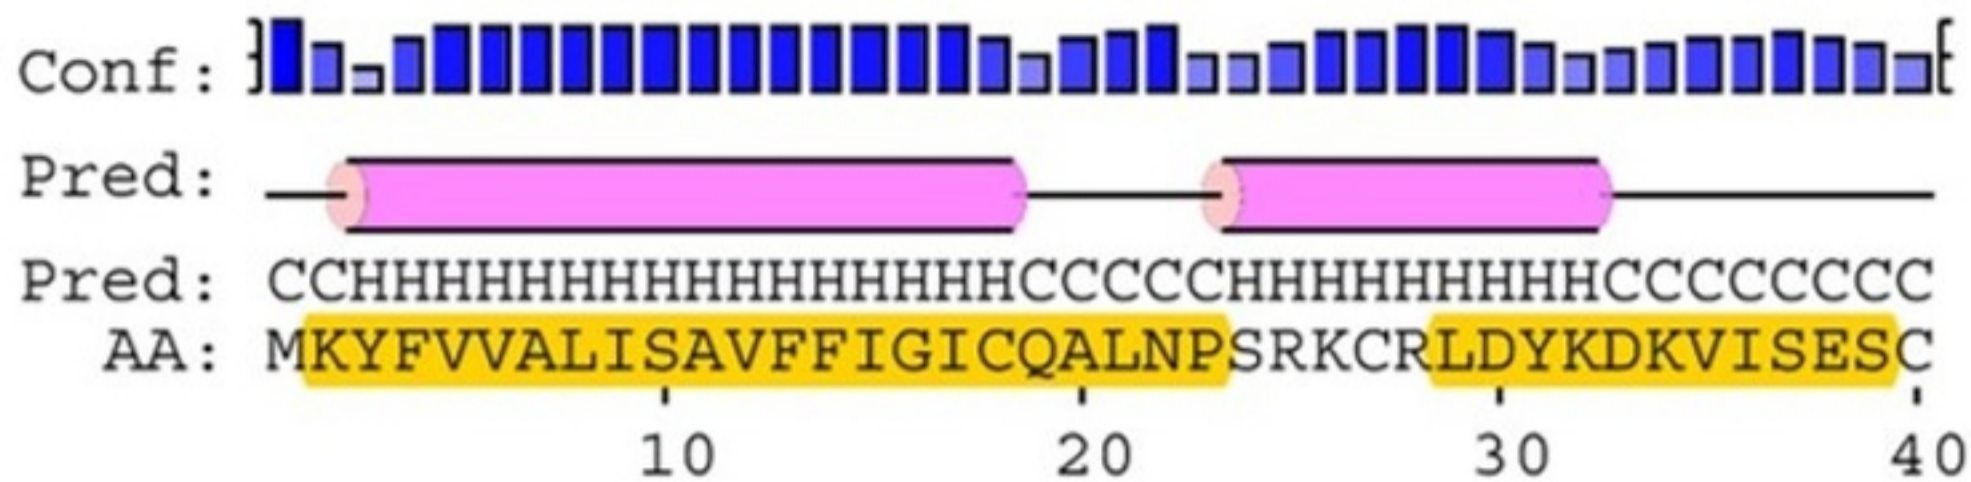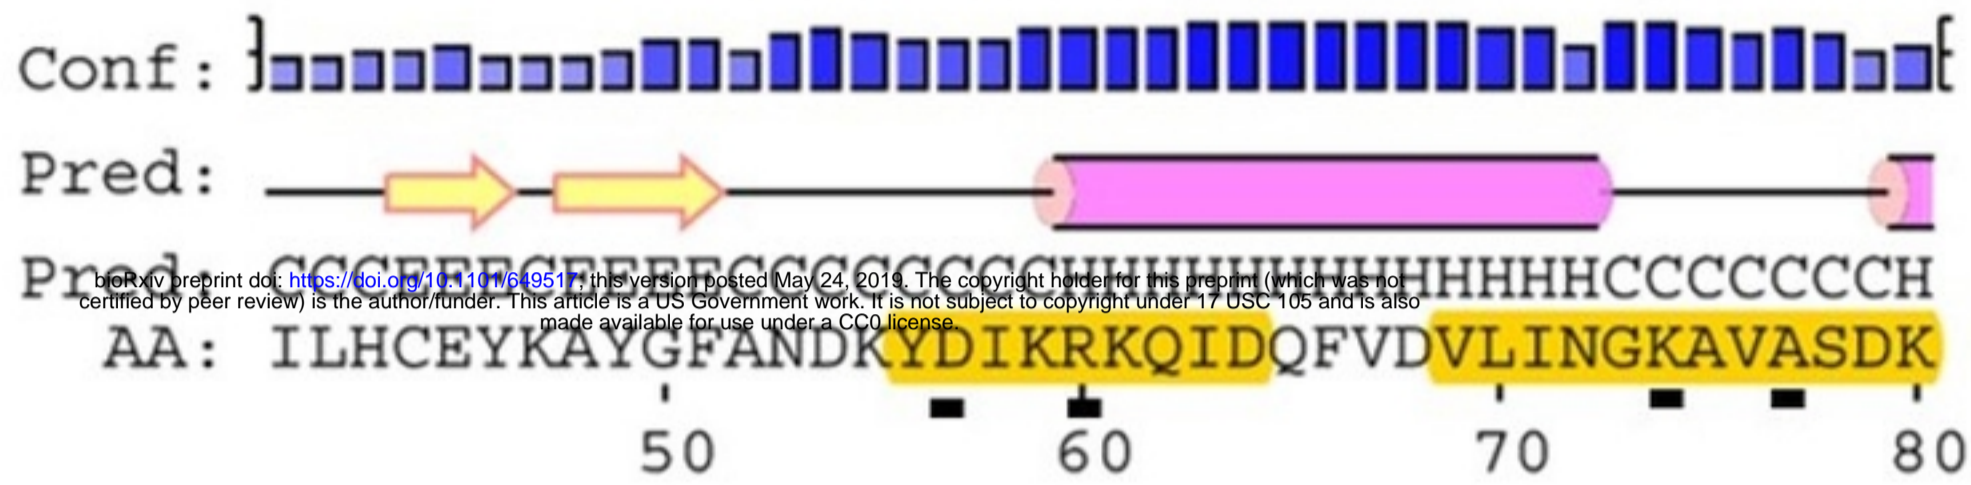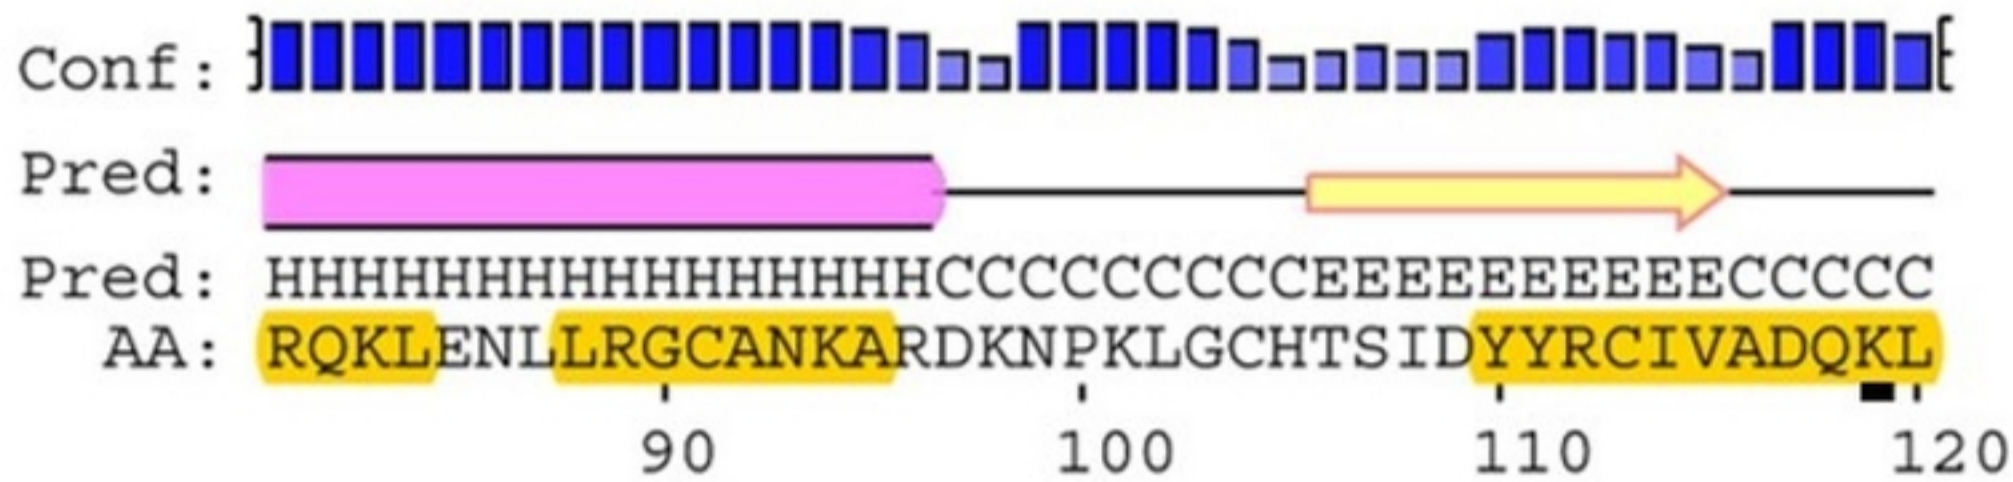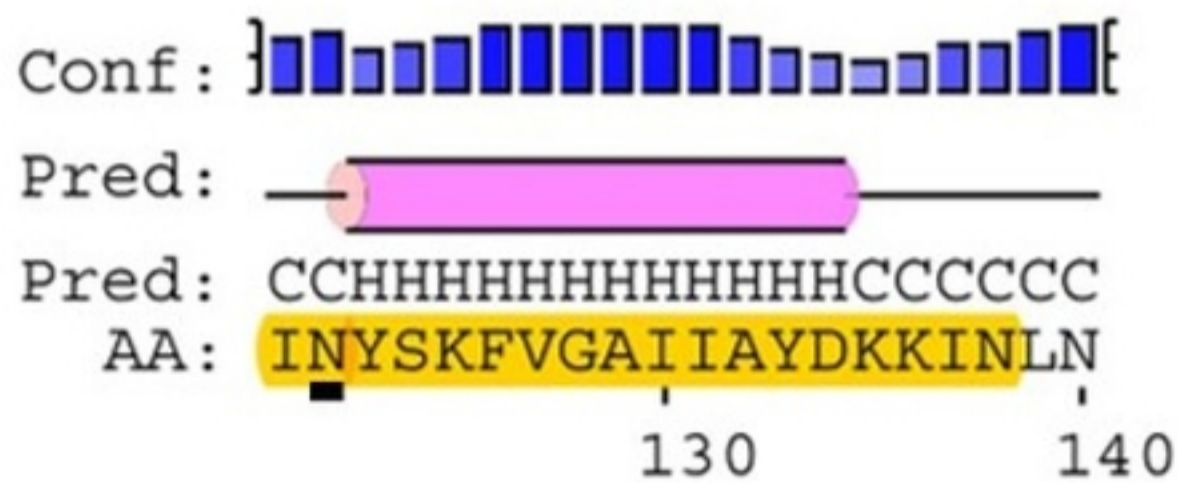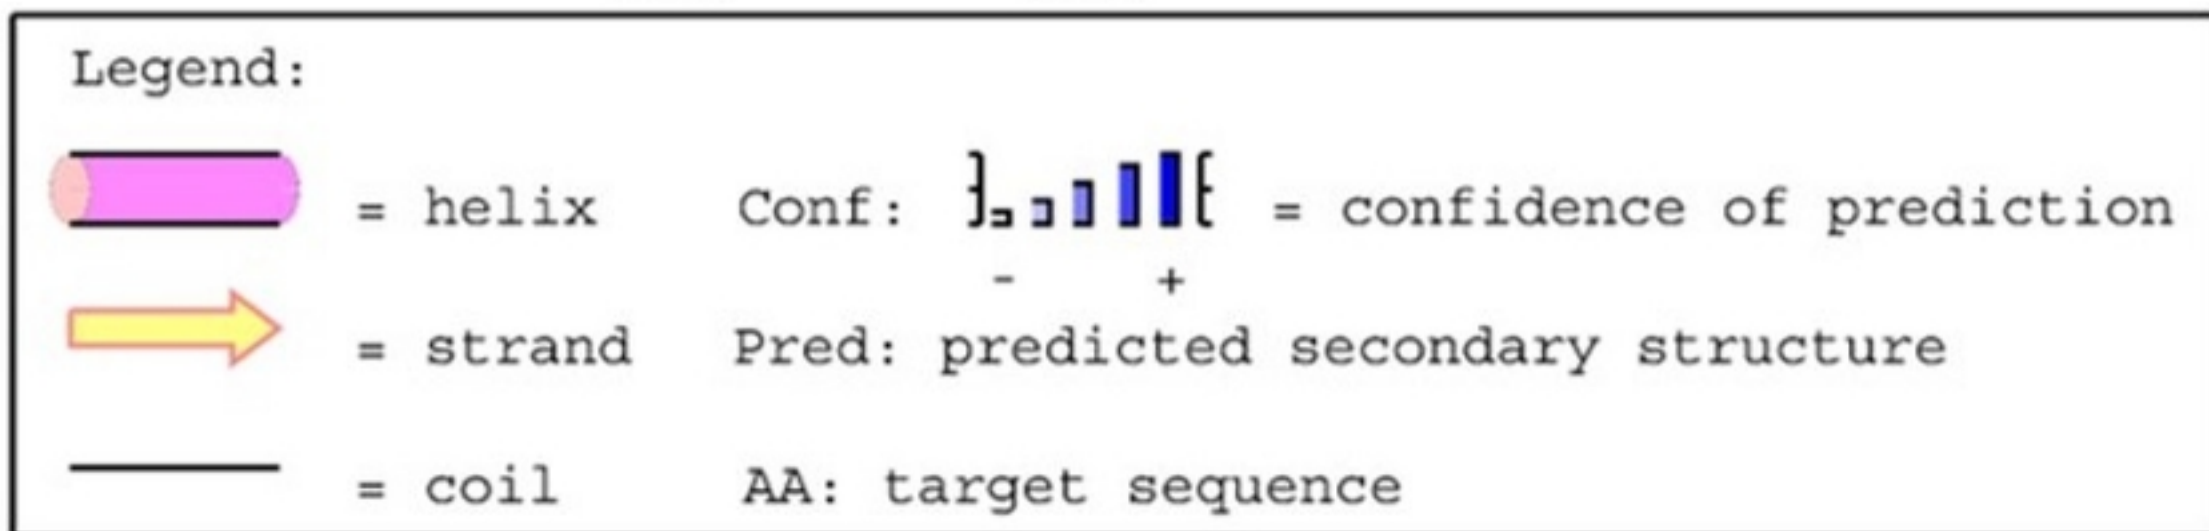

Figure 4

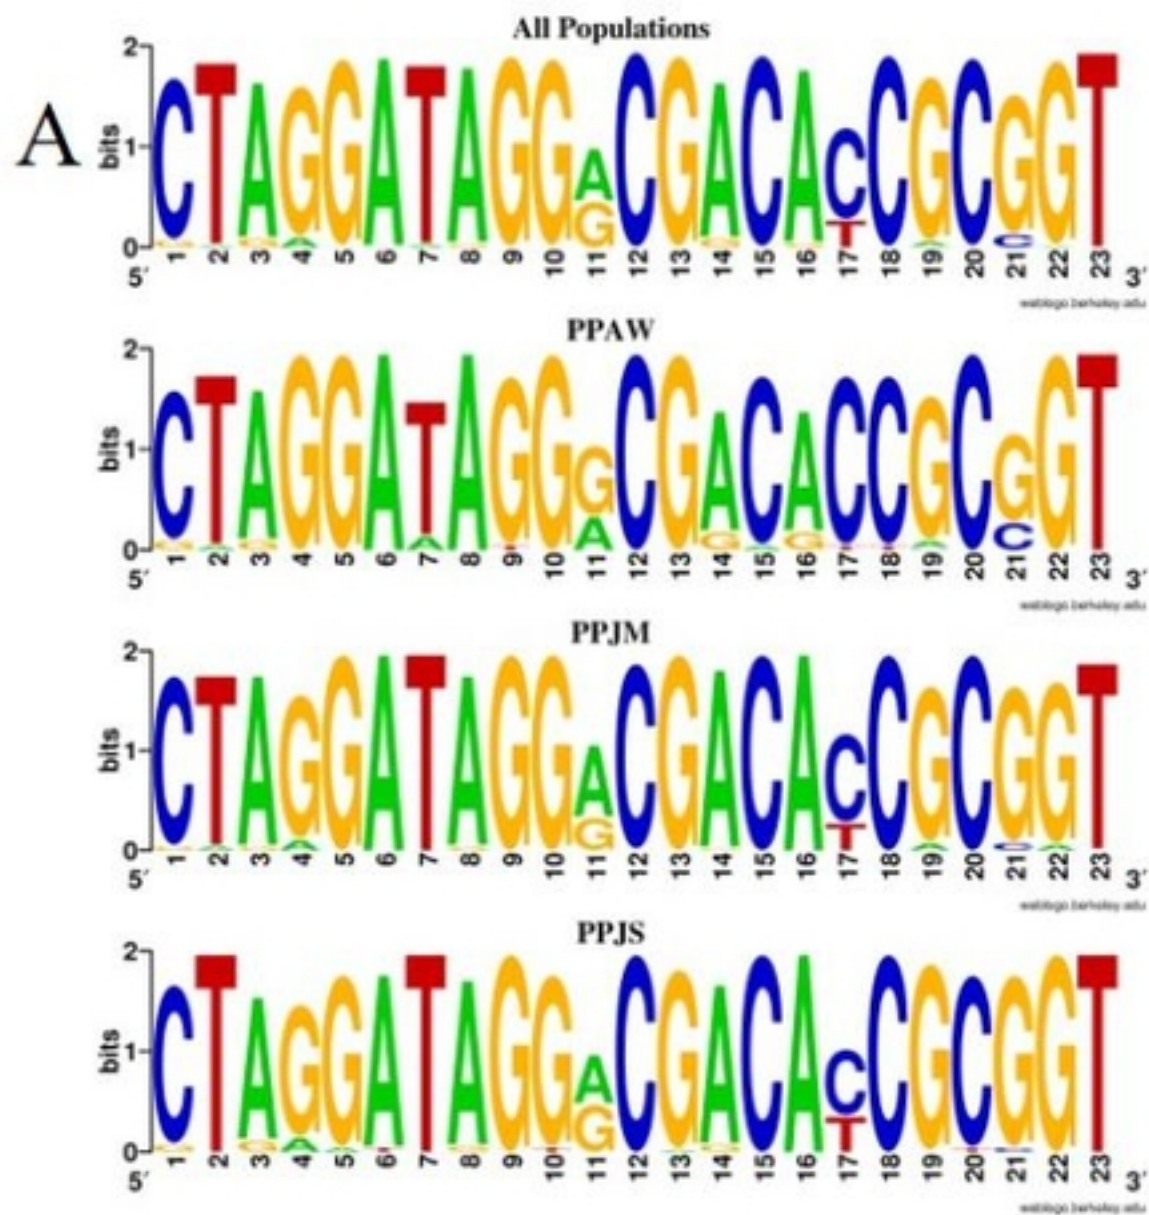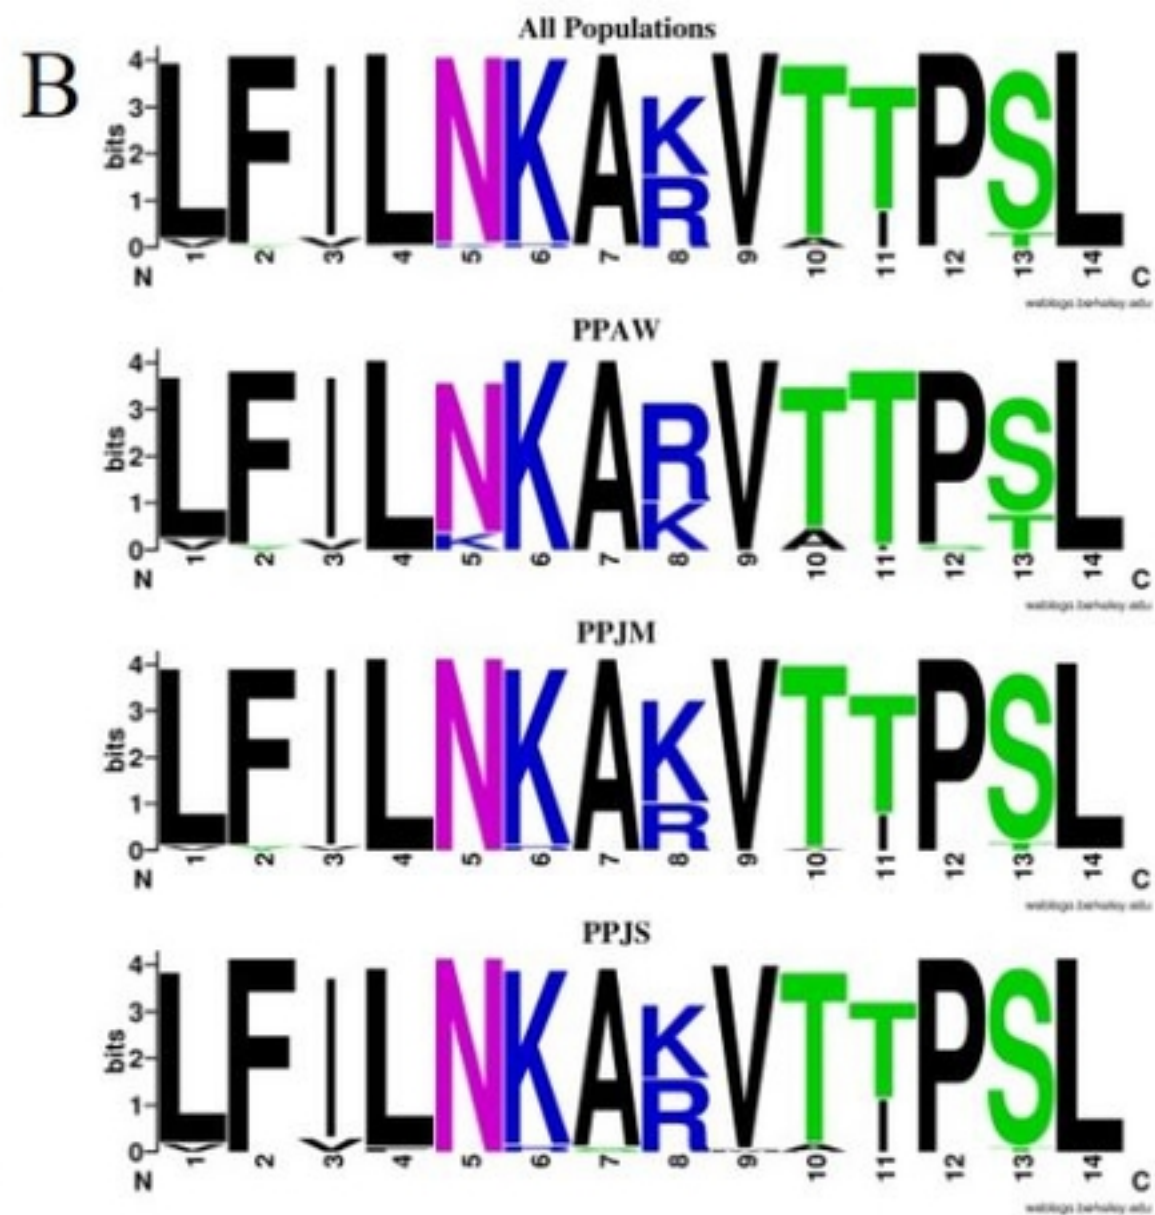

Figure 5

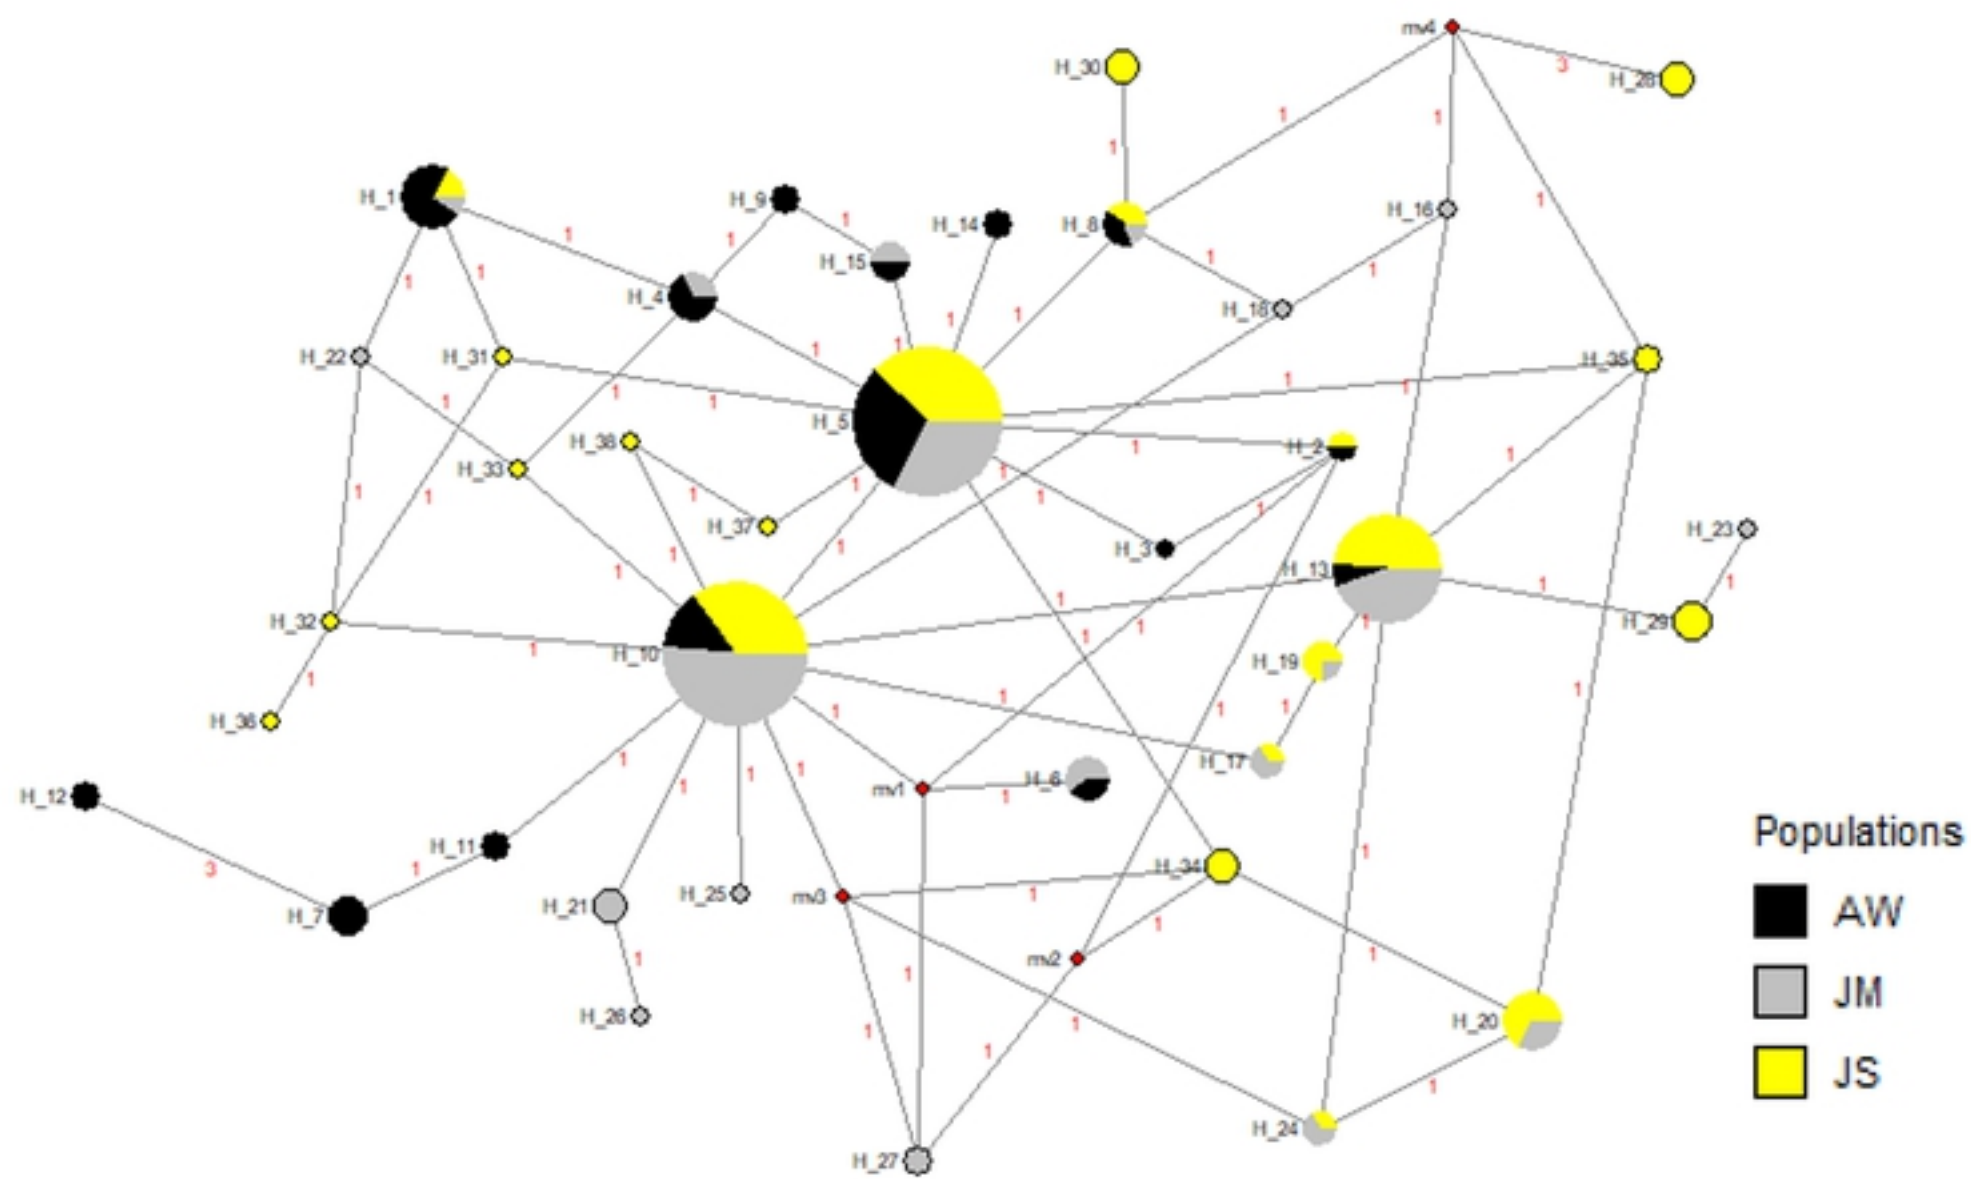

Figure 6

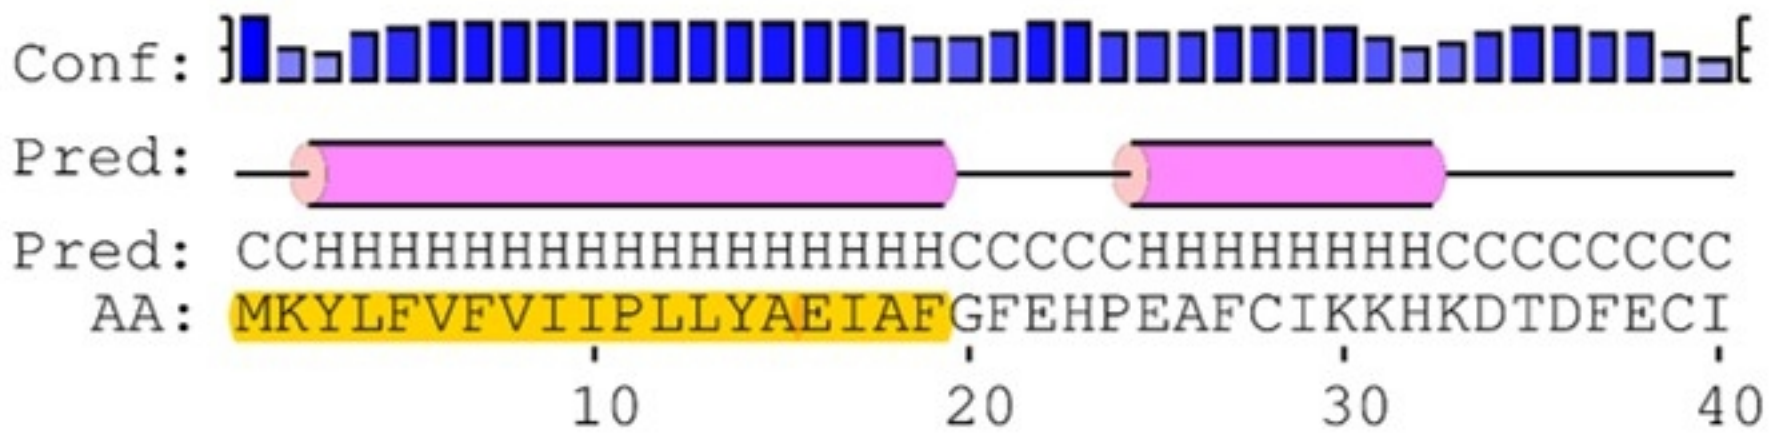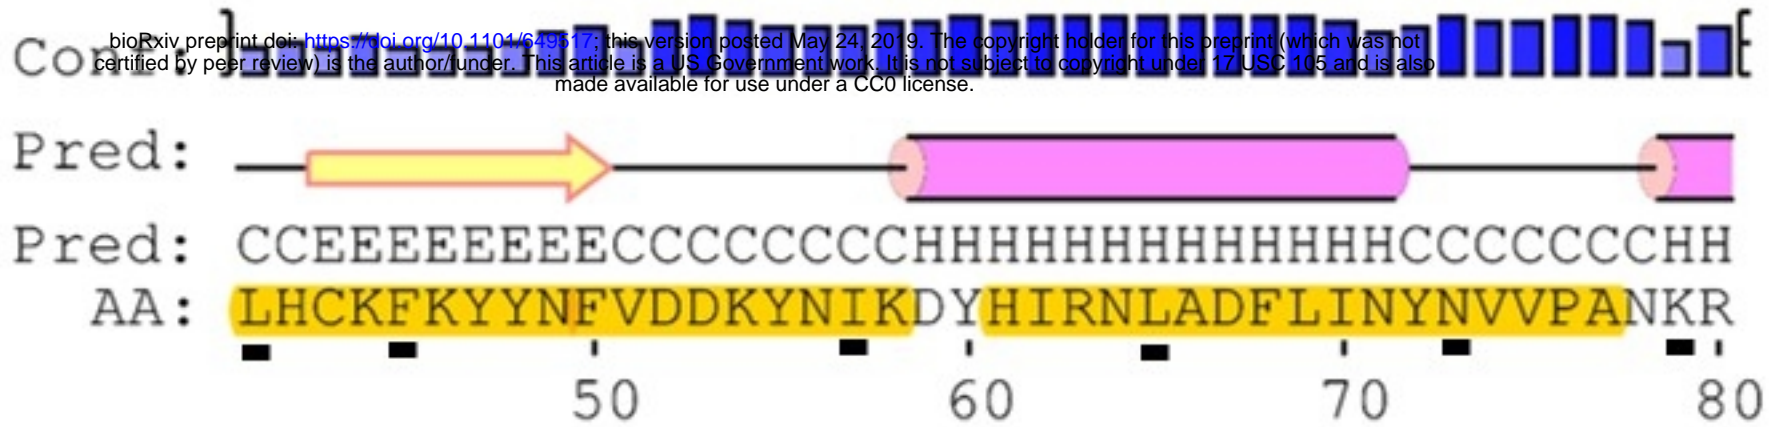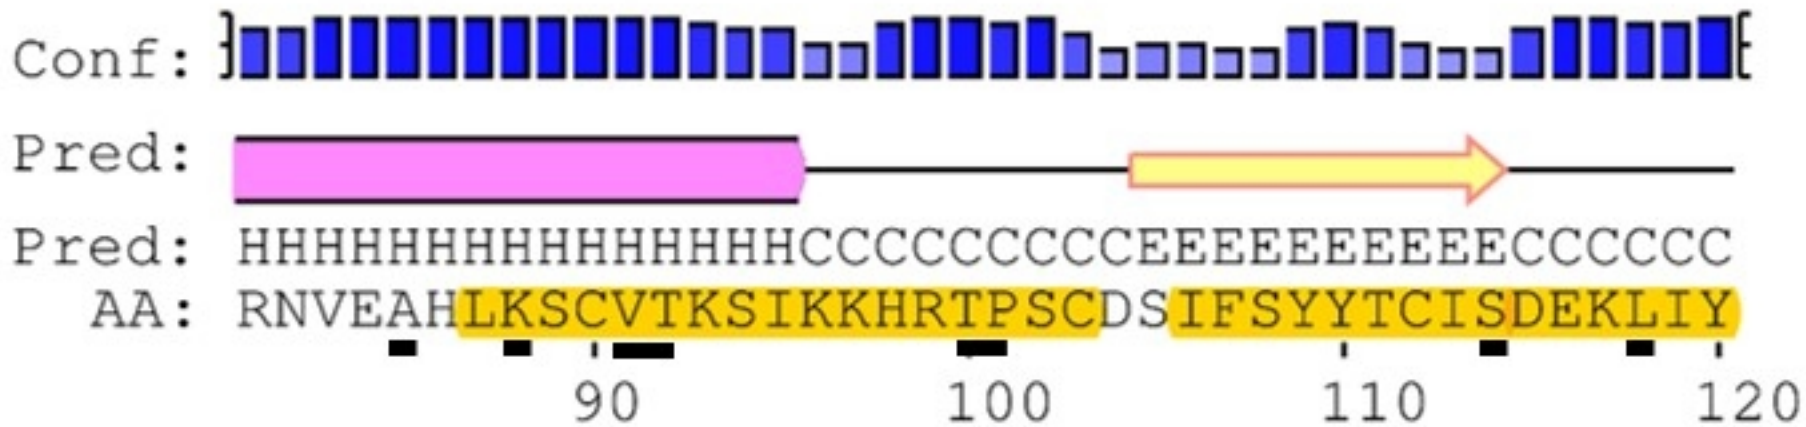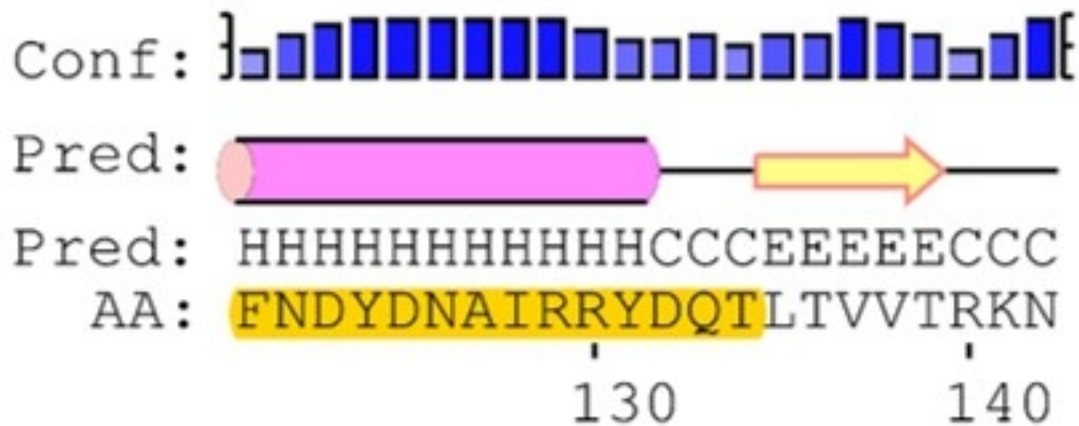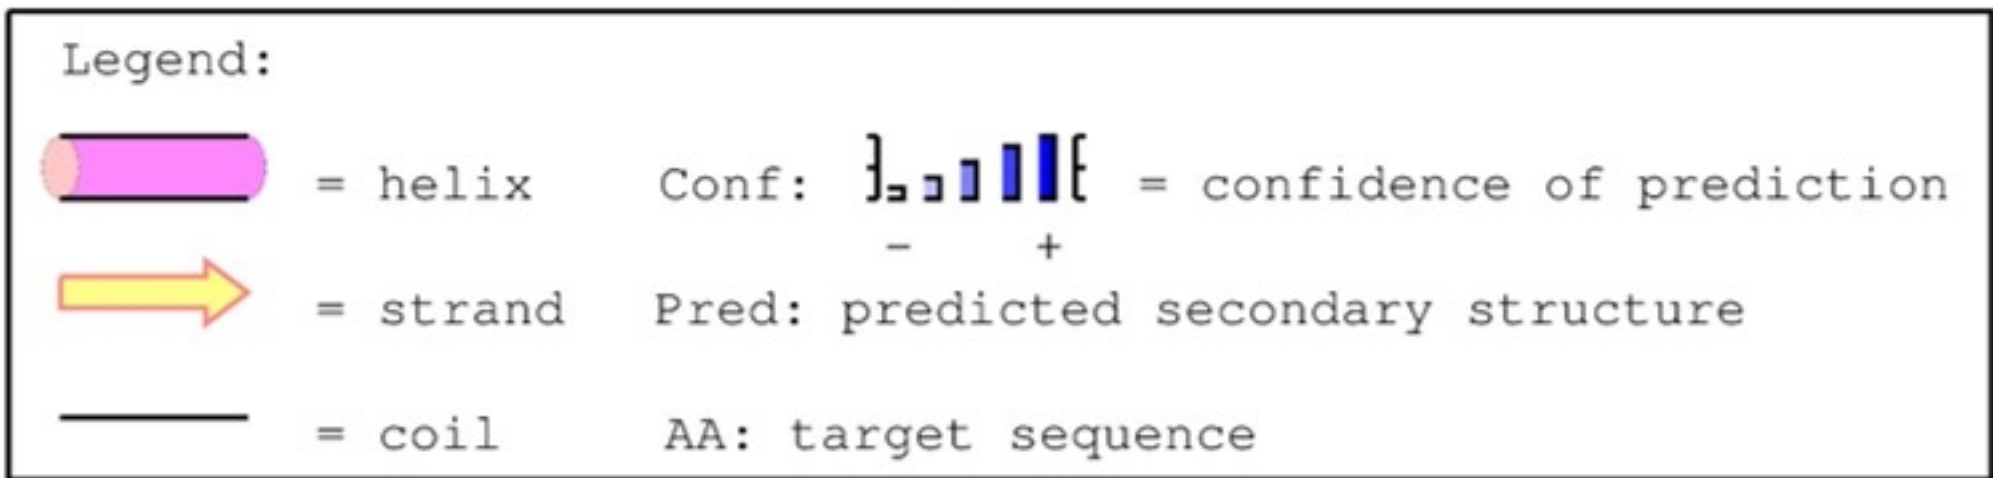

Figure 7

A

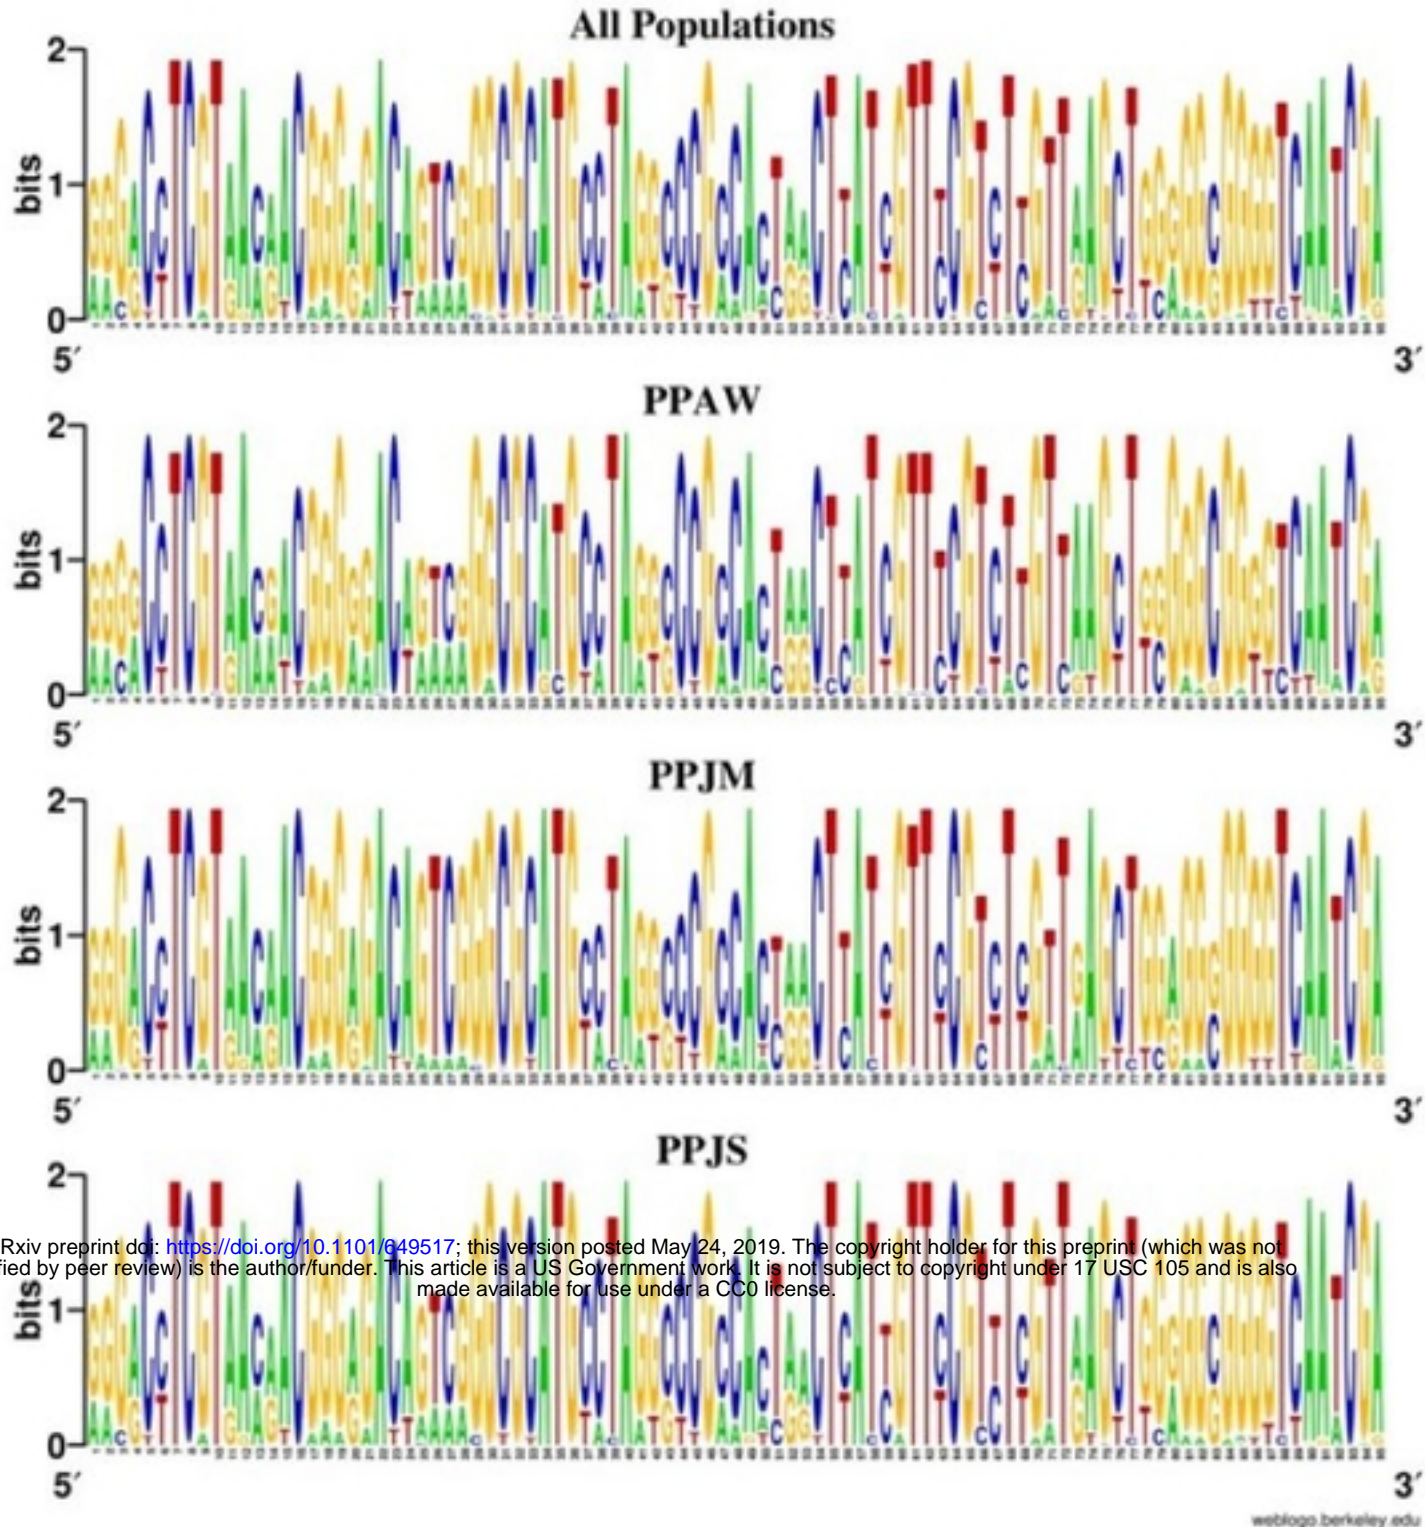

B

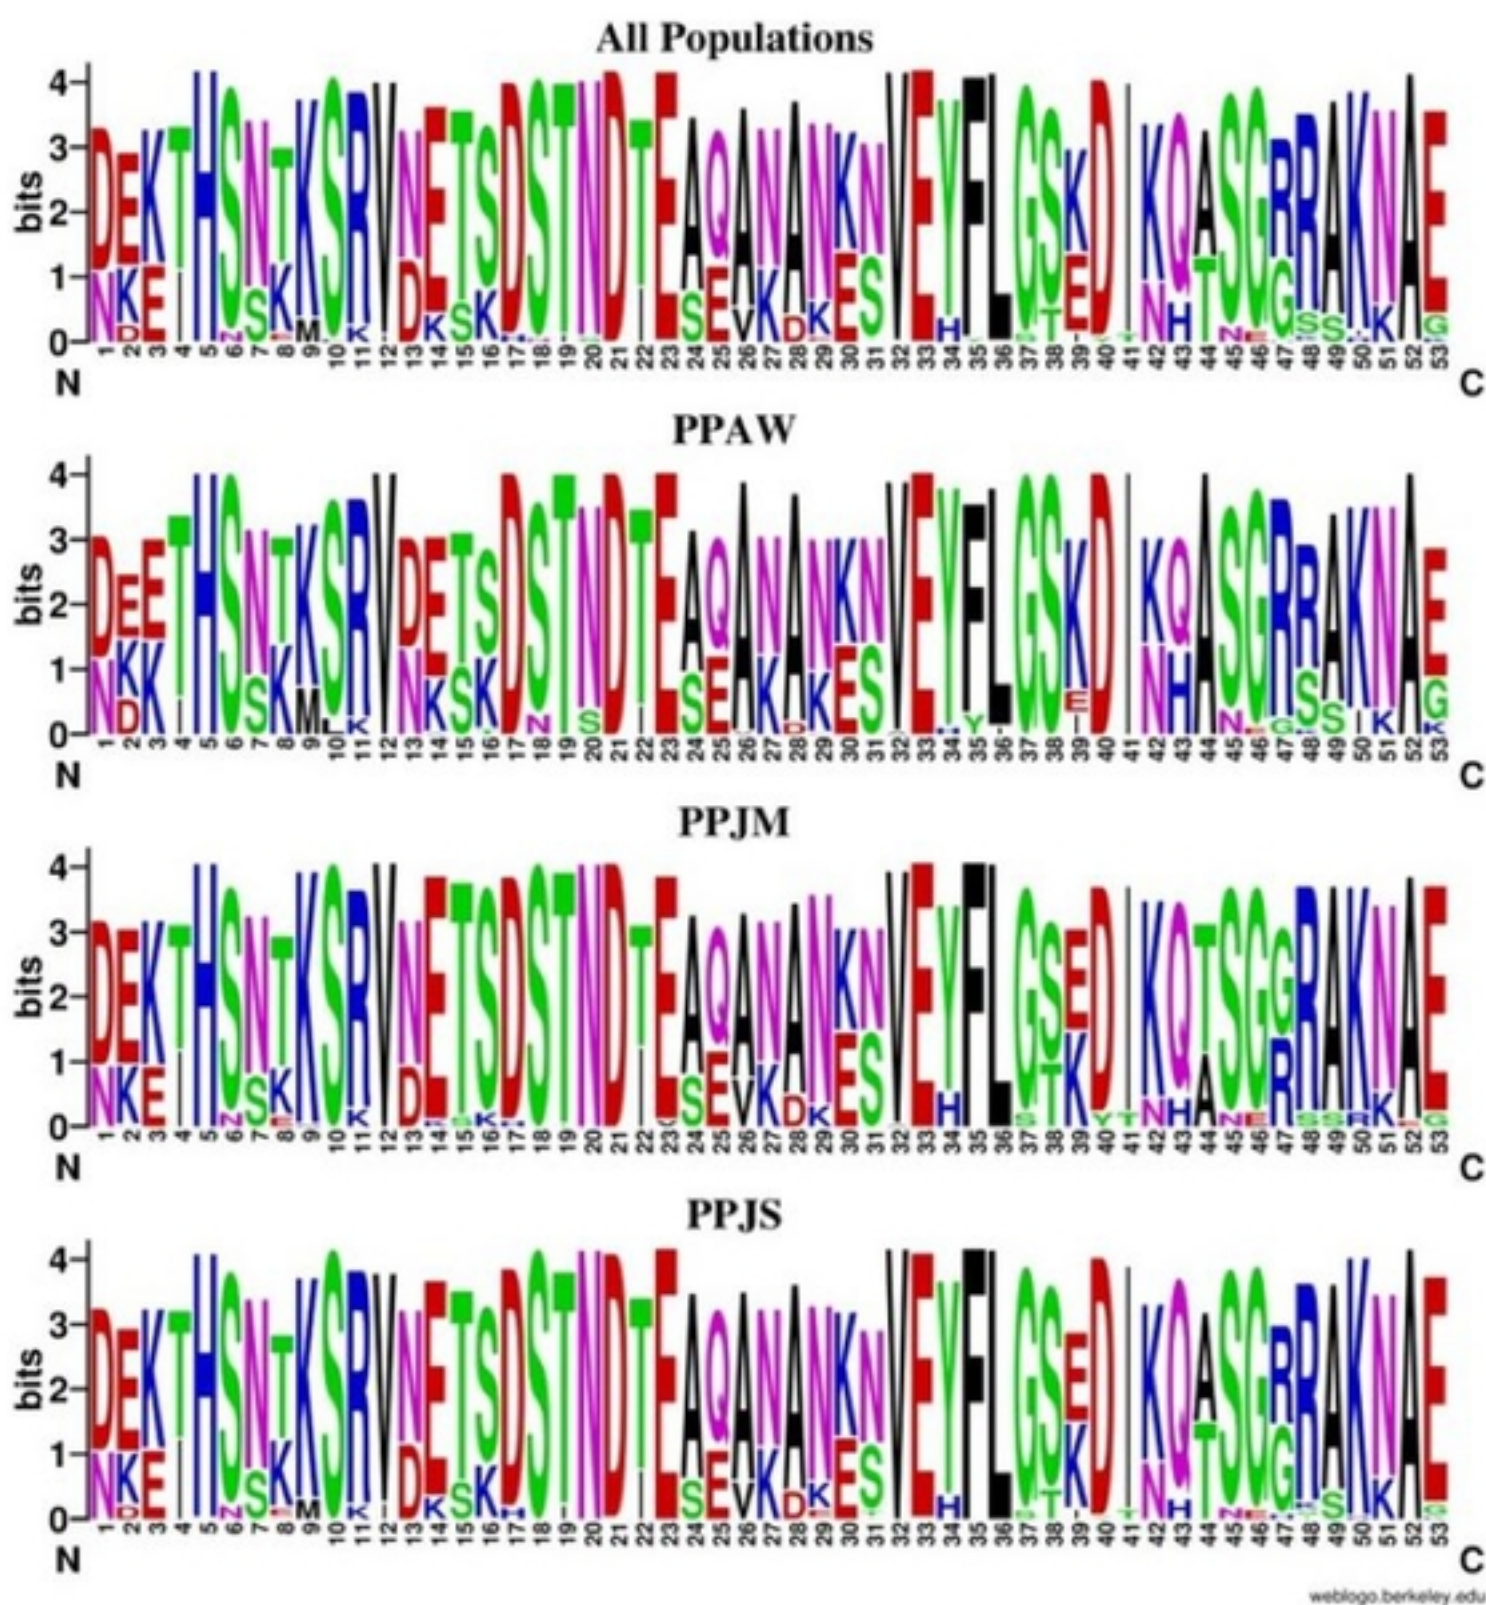

Figure 8

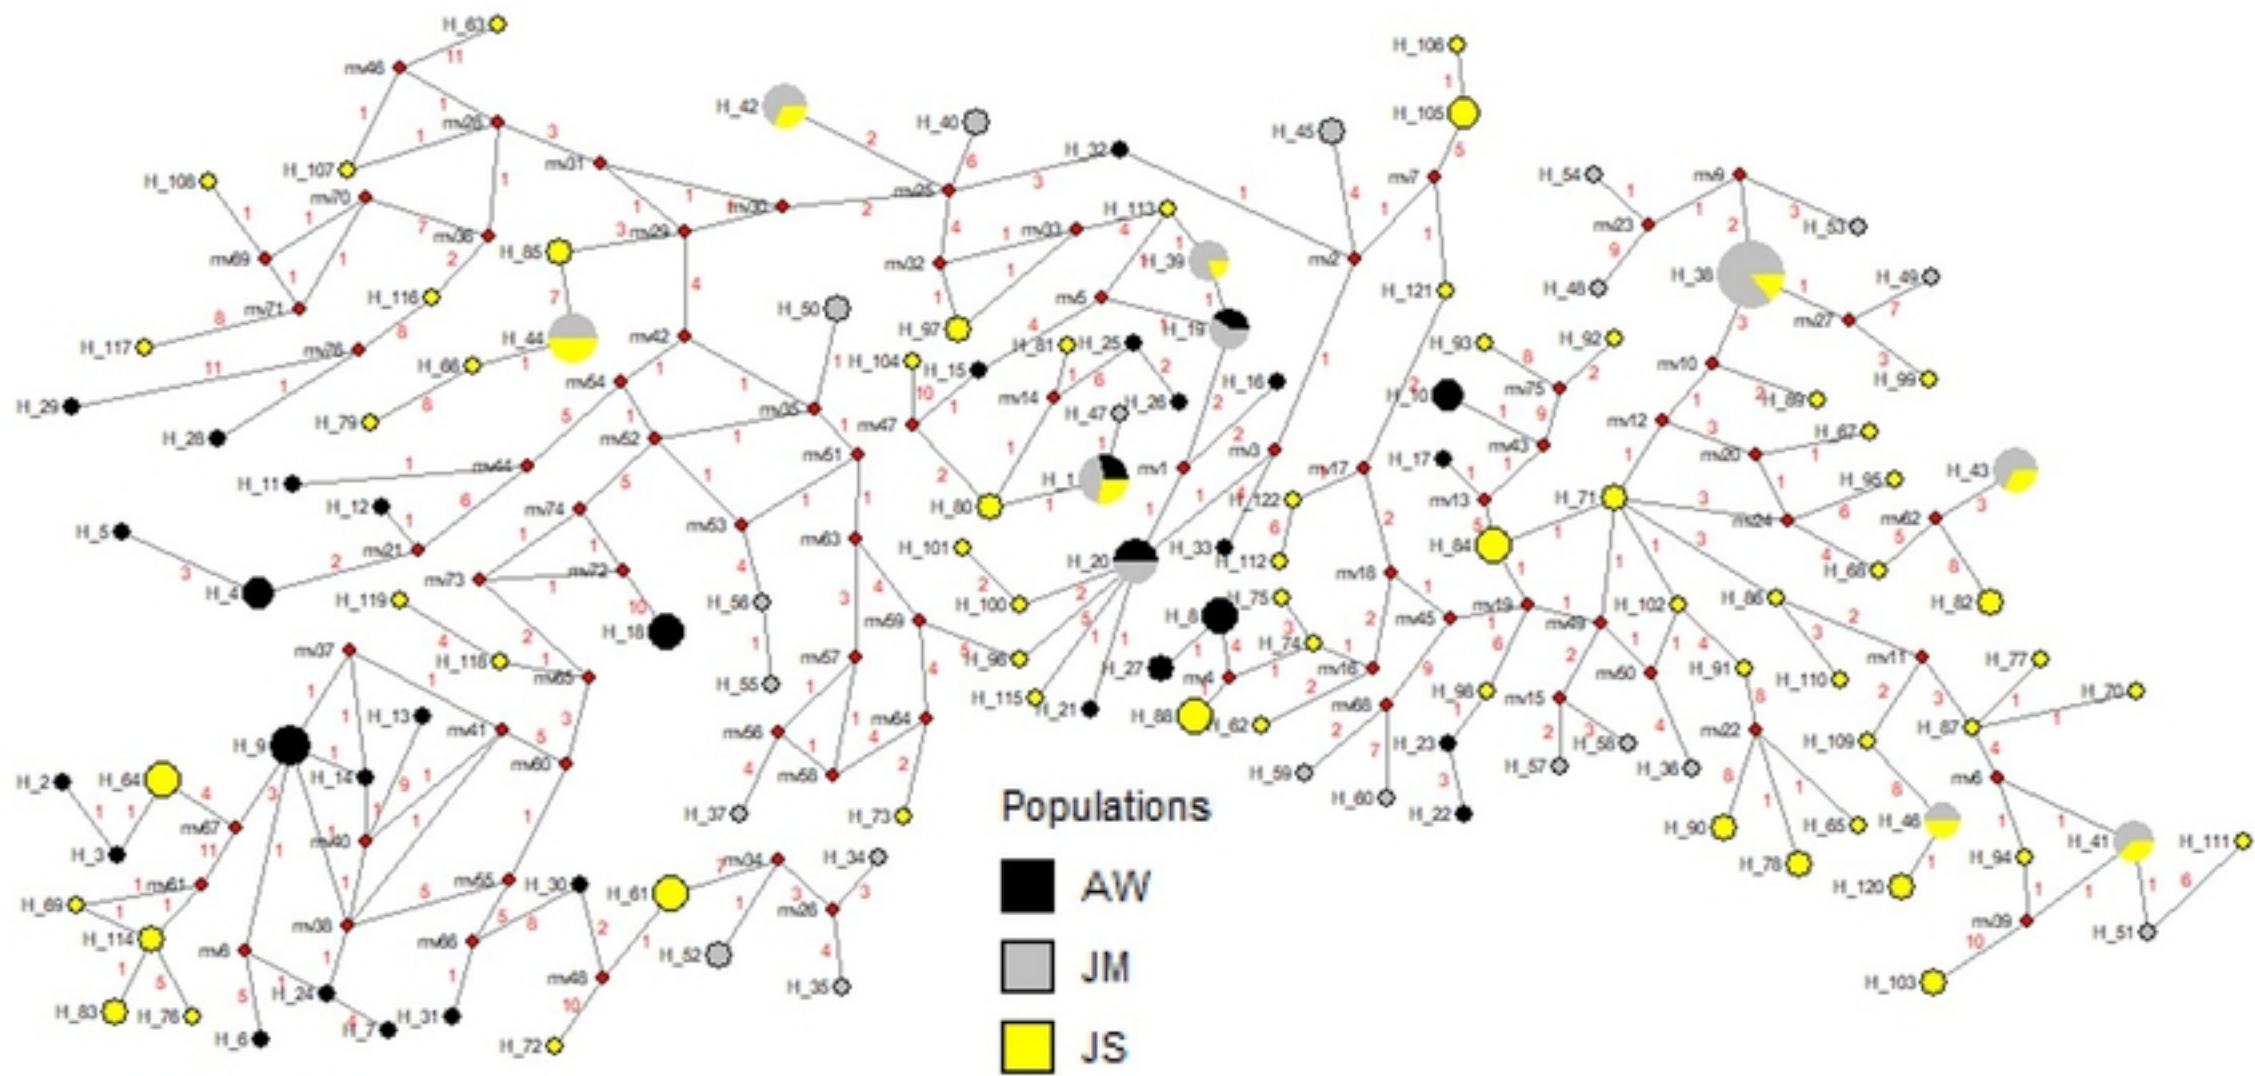

Figure 9



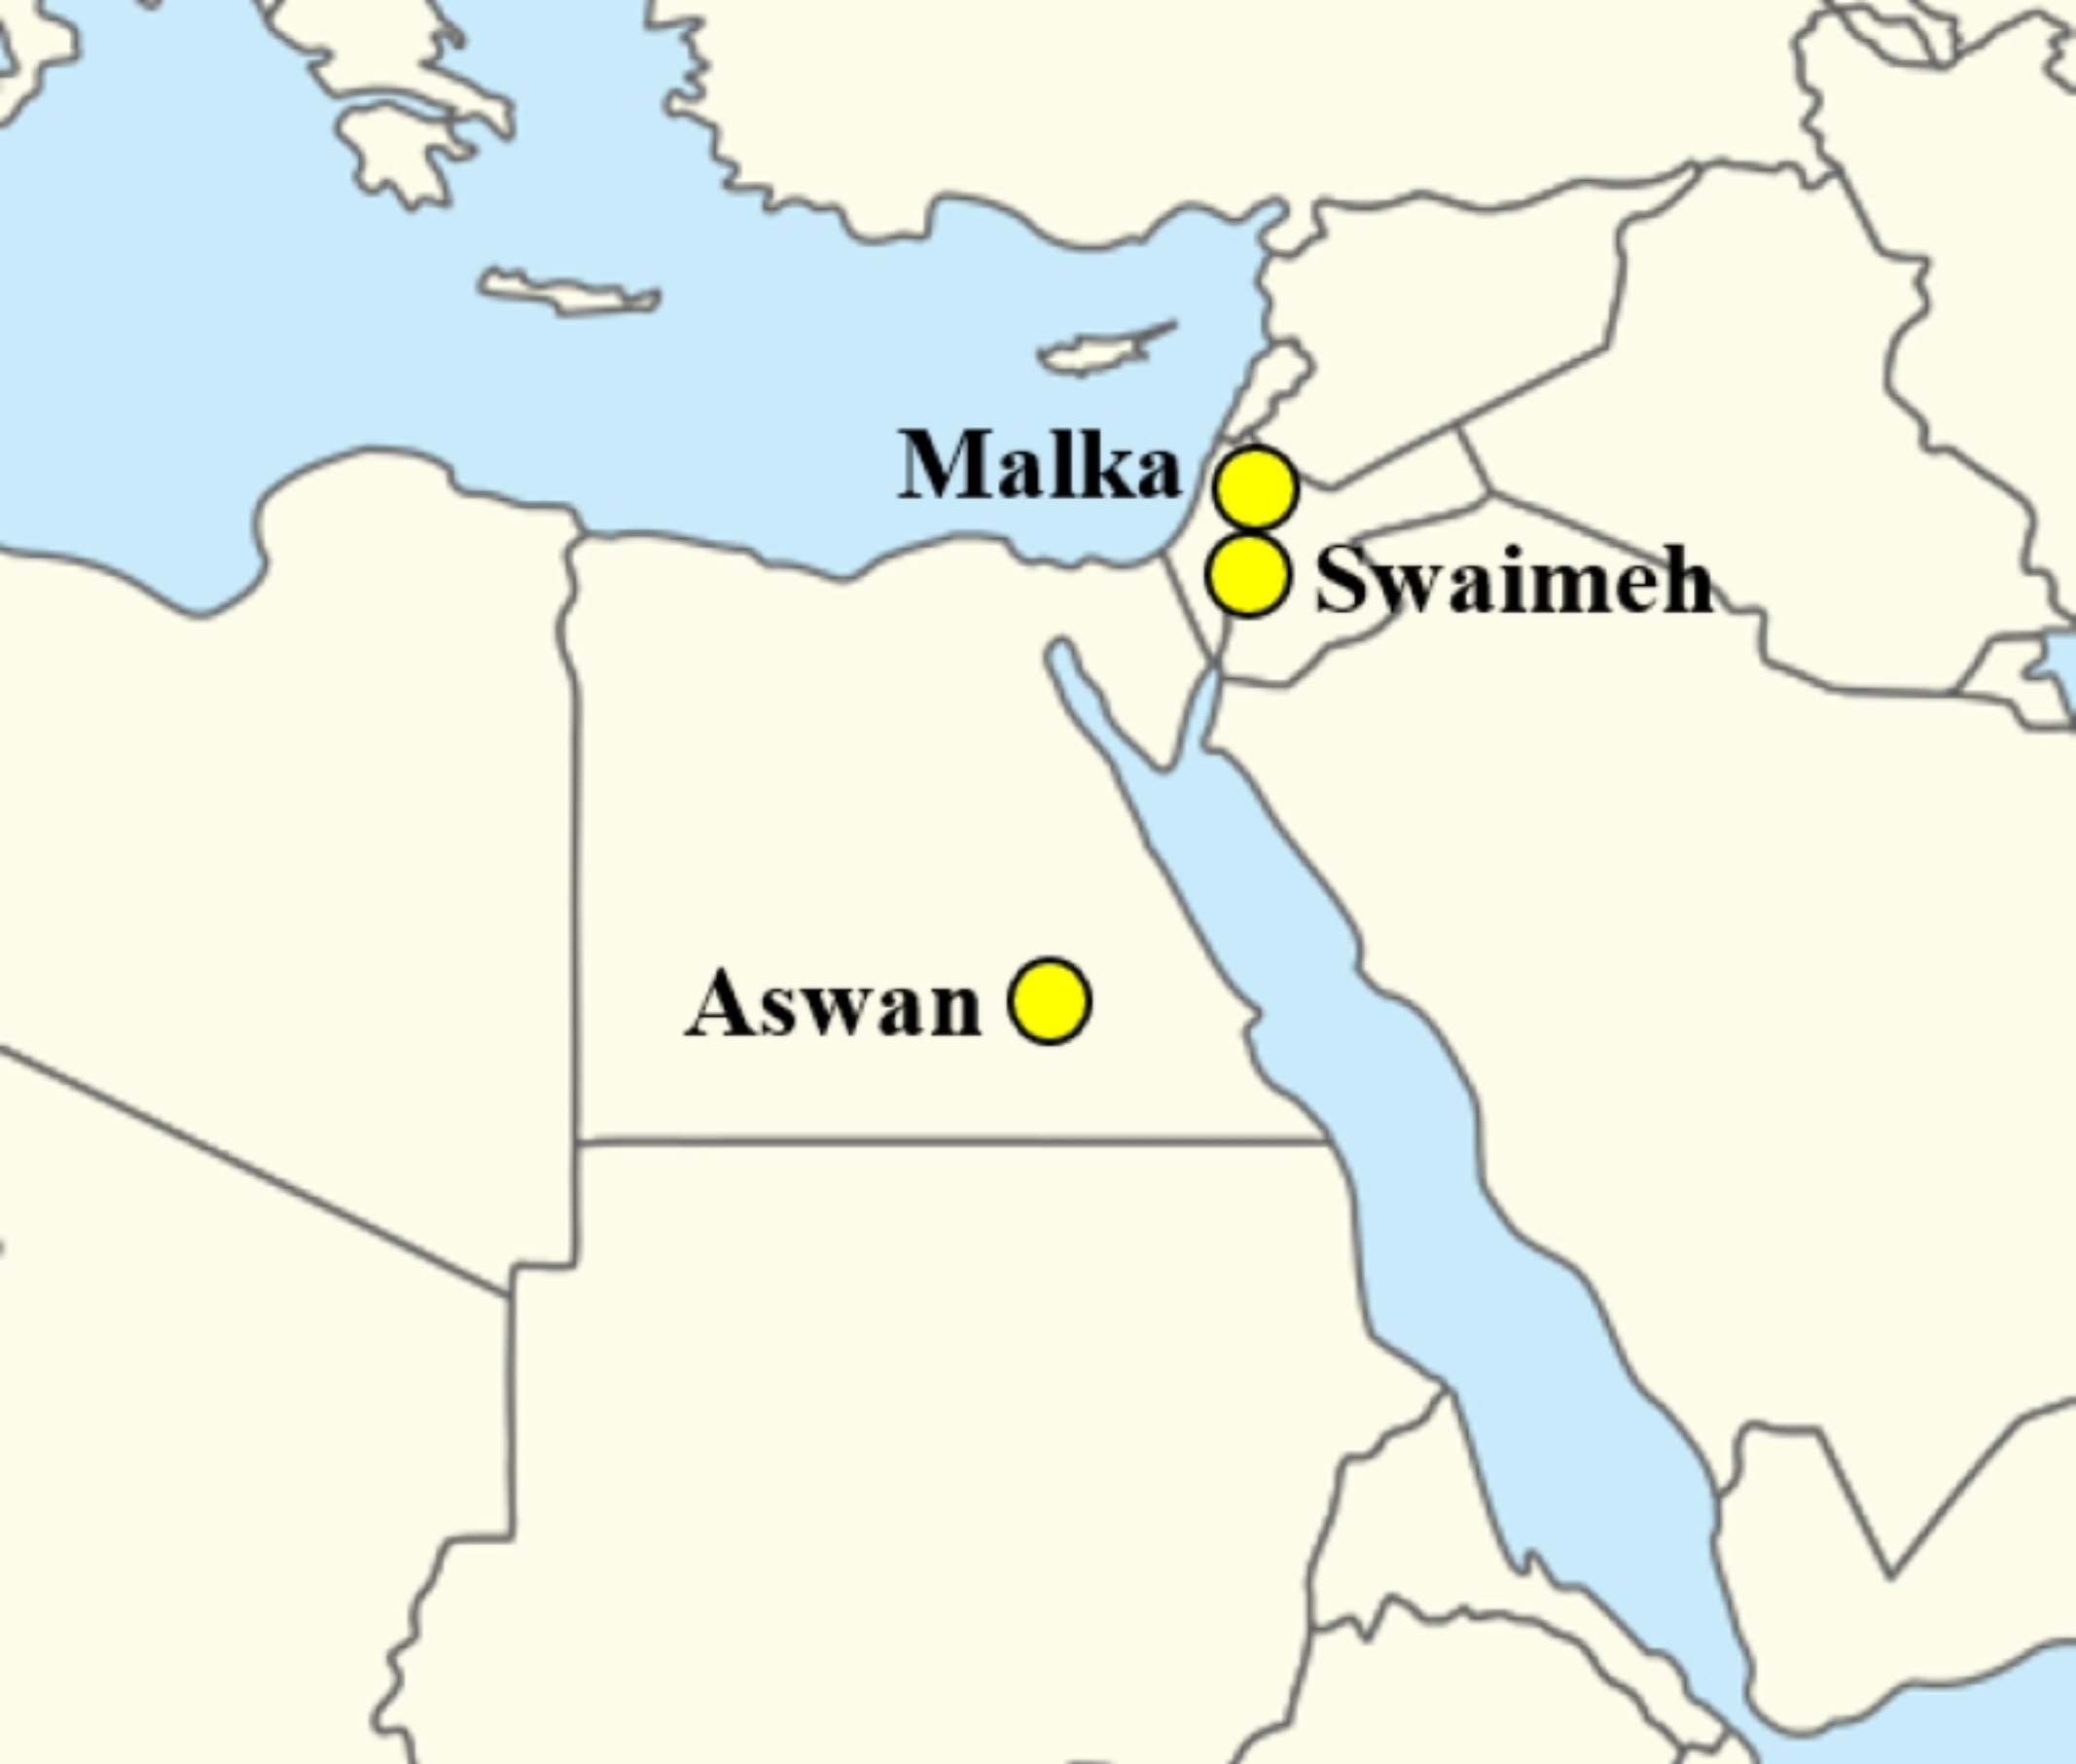

Figure 1
